# Supplementary material for: Association between organisational and workplace cultures, and patient outcomes: systematic review
Source: PubMed Central journal article supplement — BMJ Open. 2017 Nov 8;7(11):e017708. doi: 10.1136/bmjopen-2017-017708 (PMC5695304; doi:10.1136/bmjopen-2017-017708), 2017-11-08
Supplement: bmjopen-2017-017708.draft_revisions.pdf [file bmjopen-2017-017708.draft_revisions.pdf]

# BMJ Open

BMJ Open is committed to open peer review. As part of this commitment we make the peer review history of every article we publish publicly available.

When an article is published we post the peer reviewers' comments and the authors' responses online. We also post the versions of the paper that were used during peer review. These are the versions that the peer review comments apply to.

The versions of the paper that follow are the versions that were submitted during the peer review process. They are not the versions of record or the final published versions. They should not be cited or distributed as the published version of this manuscript.

BMJ Open is an open access journal and the full, final, typeset and author-corrected version of record of the manuscript is available on our site with no access controls, subscription charges or pay-per-view fees (<http://bmjopen.bmj.com>).

If you have any questions on BMJ Open's open peer review process please email [editorial.bmjopen@bmj.com](mailto:editorial.bmjopen@bmj.com)

# BMJ Open

## The association between organisational and workplace cultures, and patient outcomes: systematic review

|                                 |                                                                                                                                                                                                                                                                                                                                                                                                                                    |
|---------------------------------|------------------------------------------------------------------------------------------------------------------------------------------------------------------------------------------------------------------------------------------------------------------------------------------------------------------------------------------------------------------------------------------------------------------------------------|
| Journal:                        | <i>BMJ Open</i>                                                                                                                                                                                                                                                                                                                                                                                                                    |
| Manuscript ID                   | bmjopen-2017-017708                                                                                                                                                                                                                                                                                                                                                                                                                |
| Article Type:                   | Research                                                                                                                                                                                                                                                                                                                                                                                                                           |
| Date Submitted by the Author:   | 15-May-2017                                                                                                                                                                                                                                                                                                                                                                                                                        |
| Complete List of Authors:       | Braithwaite, Jeffrey; Macquarie University, Australian Institute of Health Innovation<br>Herkes, Jessica; Macquarie University, Australian Institute of Health Innovation<br>Ludlow, Kristiana; Macquarie University, Australian Institute of Health Innovation<br>Testa, Luke; Macquarie University, Australian Institute of Health Innovation<br>Lamprell, Gina; Macquarie University, Australian Institute of Health Innovation |
| <b>Primary Subject Heading</b>: | Health services research                                                                                                                                                                                                                                                                                                                                                                                                           |
| Secondary Subject Heading:      | Health services research, Sociology, Medical management, Public health                                                                                                                                                                                                                                                                                                                                                             |
| Keywords:                       | Health & safety < HEALTH SERVICES ADMINISTRATION & MANAGEMENT, Health policy < HEALTH SERVICES ADMINISTRATION & MANAGEMENT, PUBLIC HEALTH, Quality in health care < HEALTH SERVICES ADMINISTRATION & MANAGEMENT, Clinical governance < HEALTH SERVICES ADMINISTRATION & MANAGEMENT, Organisational development < HEALTH SERVICES ADMINISTRATION & MANAGEMENT                                                                       |
|                                 |                                                                                                                                                                                                                                                                                                                                                                                                                                    |

SCHOLARONE™  
Manuscripts

1  
2  
3 1 **The association between organisational and workplace cultures, and patient outcomes:**  
4  
5 2 **systematic review**  
6  
7 3

8 4 **Braithwaite, J<sup>1</sup>,\* Herkes, J<sup>1</sup>, Ludlow, K<sup>1</sup>, Testa, L<sup>1</sup>, Lamprell, G<sup>1</sup>**

9  
10 5 <sup>1</sup>Australian Institute of Health Innovation, Macquarie University  
11

12 6

13  
14 7 \*Corresponding Author

15 8 Level 6, 75 Talavera Rd

16 9 Macquarie University

17 10 Sydney, NSW 2109

18 11 Australia

19 12 P + 61 2 9850 2401 | F + 61 2 8088 6234

20 13 email: [jeffrey.braithwaite@mq.edu.au](mailto:jeffrey.braithwaite@mq.edu.au)  
21  
22  
23  
24  
25  
26  
27  
28  
29  
30  
31  
32  
33  
34  
35  
36  
37  
38  
39  
40  
41  
42  
43  
44  
45  
46  
47  
48  
49  
50  
51  
52  
53  
54  
55  
56  
57  
58  
59  
60

15 15 **Jeffrey BRAITHWAITE**,\* PhD

16 16 **Jessica HERKES**, BSc (Adv)

17 17 **Kristiana LUDLOW**, BPsych (Hons)

18 18 **Luke TESTA**, MPH

19 19 **Gina LAMPRELL**, BA (Hons)

20 20

21 21 **Keywords**

22 22 Health & safety; health policy; public health; quality in healthcare; clinical governance;  
23 23 organisational development.  
24  
25

**Manuscript data**

**Number of pages (including references): 30**

**Word count (Body): 2,975**

**Word count (Abstract): 300**

**Tables: 3**

**Figures: 3**

**References: 94**

1  
2  
3 26 **ABSTRACT**  
4

5 27 **Design and objectives:** Every organisation has a unique culture. There is a widely-held view  
6  
7  
8 28 that a positive organisational culture is related to positive patient outcomes. Following the  
9  
10 29 Preferred Reporting Items for Systematic Review and Meta-analysis Protocols (PRISMA-P),  
11  
12 30 we systematically reviewed and synthesised the evidence on the extent to which  
13  
14 31 organisational and workplace cultures are associated with patient outcomes across a range of  
15  
16 32 healthcare settings.

17  
18  
19 33 **Setting:** A variety of healthcare facilities, including hospitals, general practices, pharmacies,  
20  
21 34 military hospitals, aged care facilities, mental health and other healthcare contexts.  
22  
23

24 35 **Participants:** The articles included were heterogeneous in terms of participants. This was  
25  
26 36 expected as we allowed scope for wide-ranging health contexts to be included in the review.  
27  
28

29 37 **Primary and secondary outcome measures:** Patient outcomes, inclusive of specific  
30  
31 38 outcomes such as decubitus ulcer and pain level, as well as broader outcomes such as quality  
32  
33 39 of care and patient experience.  
34  
35

36 40 **Results:** The search strategy identified 2,049 relevant articles. A review of abstracts using the  
37  
38 41 inclusion criteria yielded 204 articles eligible for full-text review. Sixty-two articles were  
39  
40 42 included in the final analysis. We assessed studies for risk of bias and quality of evidence.  
41  
42 43 The majority of studies (84%) were from the North America or Europe, and conducted in  
43  
44 44 hospital settings (89%). They were largely quantitative (94%) and cross-sectional (81%). The  
45  
46 45 review identified four interventional studies, and no randomised controlled trials. We found  
47  
48 46 that overall, organisational and workplace cultures were consistently associated with a wide  
49  
50 47 range of patient outcomes such as reduced mortality rates, falls and hospital acquired  
51  
52 48 infections and increased patient satisfaction.  
53  
54  
55  
56  
57  
58  
59  
60

1  
2  
3 49 **Conclusions:** Synthesised, although there was no level 1 evidence, our review found a  
4  
5 50 positive association held between culture and outcomes across multiple studies, settings and  
6  
7 51 countries. This supports the argument in favour of activities which promote positive cultures  
8  
9  
10 52 in health care organisations to enhance care.

11  
12 53

13  
14  
15 54 **ARTICLE SUMMARY: STRENGTHS AND LIMITATIONS OF THIS STUDY**

- 16  
17  
18 55 • The high volume of included studies provides a solid foundation for readers to  
19  
20 56 enhance their knowledge of organisational culture in healthcare.  
21  
22 57 • Most articles included in the final synthesis were rated as high quality, based on the  
23  
24 58 Quality Assessment Tool.  
25  
26  
27 59 • The broad scope of the review, including a wide-ranging search strategy, provided an  
28  
29 60 overarching account of the research topic.  
30  
31  
32 61 • Definitions and measurements of culture, climate, environment and patient outcomes  
33  
34 62 were highly variable across studies, which placed limits on the comparisons that could  
35  
36 63 be drawn.  
37  
38 64 • This review aimed to investigate the association between organisational and  
39  
40 65 workplace culture, and patient outcomes across a *variety of health settings*, however,  
41  
42 66 most included studies consisted of observational, cross-sectional studies conducted in  
43  
44 67 hospital environments.  
45  
46  
47  
48 68

1  
2  
3 69 **The association between organisational and workplace cultures, and patient**  
4  
5 70 **outcomes: systematic review**  
6  
7  
8 71  
9

10 72 **INTRODUCTION**  
11

12  
13 73 Amongst policymakers, managers and clinicians, culture is a much-discussed construct. The  
14  
15 74 discourse is often centred on normative considerations, proposing that an effective, functional  
16  
17 75 or productive culture is preferable to one that is ineffective, dysfunctional or even toxic. A  
18  
19 76 healthier organisational or workplace culture is believed to be related to positive patient  
20  
21 77 outcomes, such as reduced mortality and length of stay, increased quality of life and  
22  
23 78 decreased pain level.[1, 2] However, no review has been conducted to weigh the evidence for  
24  
25 79 such beliefs. We examined the extent to which this putative association between culture and  
26  
27 80 patient outcomes holds in healthcare settings.  
28  
29  
30

31 81 Across the literature, culture has been defined through numerous models.[2-8] Based  
32  
33 82 on these works, we define culture as the sum of shared characteristics, values, thinking and  
34  
35 83 behaviours of people in organisations.[2] For this systematic review, culture is classified in  
36  
37 84 two ways. The first category concerns the overarching culture of an organisation, including  
38  
39 85 consistent practices, beliefs and attitudes, for example, within a whole hospital, general  
40  
41 86 practice group, aged care facility or other setting.[9, 10] The second category relates to more  
42  
43 87 localised cultural dimensions; workplace cultures, which are specific to group characteristics  
44  
45 88 of the organisation, for example those subcultures that manifest in wards, departments, or  
46  
47 89 within employee groups such as doctors, allied health professionals, or nurses.[6, 11, 12]  
48  
49  
50

51 90

52  
53  
54 91 **Box 1: Definitions**  
55  
56  
57  
58  
59  
60

1  
2  
3 92 **Cohen's Kappa:** A statistic commonly used to measure interrater reliability; that is, the  
4  
5 93 extent to which individual rater's scores agree whilst accounting for chance agreement.[13]  
6  
7  
8 94 **Complex adaptive systems (CAS):** A multi-dimensional enterprise displaying principles  
9  
10 95 such as self-organisation, emergent behaviour, and the capacity to evolve and adapt.[14]  
11  
12  
13 96 **Organisational culture:** The values, behaviours, goals, attitudes and beliefs shared across an  
14  
15 97 entire organisation.[15]  
16  
17  
18 98 **Patient outcomes:** The downstream consequences of patient care. These can be positive  
19  
20 99 (e.g., satisfaction with care, reduced length of stay) or negative (e.g., disability, hospital  
21  
22 100 acquired infection).[16]  
23  
24  
25 101 **Quality of care:** Within a healthcare environment, there are many facets of quality of care.  
26  
27 102 Types of care that can be assessed include the technical and judgement skill provided by the  
28  
29 103 physician, and the interpersonal care received from healthcare professionals.[17]  
30  
31  
32 104 **Quality of study:** The extent that the study design and the manner in which it is executed are  
33  
34 105 protective from bias and error.[18]  
35  
36  
37 106 **Risk of bias:** The potential of a systematic deviation from facts; an error.[18]  
38  
39  
40 107 **Workplace culture:** A specific type of sub-culture involving an identifiable grouping within  
41  
42 108 an organisation. In healthcare, such a 'workplace' may be a unit, ward or department, or a  
43  
44 109 professional group, e.g., medicine or nursing.[19]  
45  
46  
47 110 **Work environment:** The structural, social and implicit characteristics of the context in  
48  
49 111 which work is done.[20] For the purposes of this review, only cultural elements of workplace  
50  
51 112 environment were considered e.g., cooperation and sense of cohesiveness between the work  
52  
53 113 team. Structural characteristics such as nurse to patient ratios, and employee characteristics  
54  
55 114 such education, were not included in our definition of work environment.  
56  
57  
58  
59  
60

1  
2  
3 115

4  
5 116 We aimed to investigate ways in which organisational and workplace cultures are  
6  
7  
8 117 associated with patient outcomes across a range of healthcare settings. On the basis of the  
9  
10 118 foregoing,[2, 16, 21] we formulated a hypothesis: *positive organisational cultures are related*  
11  
12 119 *to positive patient outcomes and vice versa*. We anticipated that this would provide  
13  
14 120 information for those, such as policymakers, managers, clinicians, researchers, and patient  
15  
16 121 groups who seek to understand, shape or enhance healthcare cultures or subcultures. We  
17  
18 122 expected that such an analysis would provide insights into the evidence for culture and sub-  
19  
20 123 cultures, and recognise that cultures are deeply embedded in Complex Adaptive Systems  
21  
22 124 (CASs) which define health settings in terms of their interacting agents, capacity to evolve  
23  
24 125 and adapt, and emergent behaviours.[14, 22]

26  
27  
28 12629  
30  
31 127 **METHODS**

32  
33  
34 128 The review was carried out in accordance with the Preferred Reporting Items for Systematic  
35  
36 129 Review and Meta-analysis Protocols (PRISMA-P) statement.[23] Our search strategy  
37  
38 130 consisted of terms pertaining to patient outcomes, inclusive of specific outcomes such as  
39  
40 131 decubitus ulcer and pain level, as well as broader terms such as quality of care and patient  
41  
42 132 experience; organisational and workplace culture; and healthcare. The review was undertaken  
43  
44 133 in accordance with a published study protocol, which provides more detailed information  
45  
46 134 regarding information sources, the search strategy, data items and data synthesis  
47  
48 135 (Supplementary file A. Published Protocol).[19]

49  
50  
51 136 A literature search of academic databases; CINAHL, EMBASE, Ovid MEDLINE,  
52  
53 137 Web of Science and PsycINFO was conducted in August 2016. Records and abstracts were  
54  
55 138 downloaded into an EndNote library and duplicates were removed. Pairs of authors (JH:GL;



1  
2  
3 139 KL:LT) reviewed 5% of records to ensure the article retention process was consistent.  
4  
5 140 Abstracts were assessed against the following inclusion criteria: English language, peer-  
6  
7 141 reviewed journal articles consisting of empirical research conducted in healthcare settings. A  
8  
9 142 broad definition of healthcare was adopted, encompassing settings including hospitals,  
10  
11 143 general practices, pharmacies, military hospitals, aged care facilities, mental health and other  
12  
13 144 healthcare settings. Articles were only included if they assessed the association between  
14  
15 145 organisational or workplace culture, and patient outcomes. Articles that measured safety  
16  
17 146 culture were included if other inclusion criteria were met, as safety culture is an important  
18  
19 147 component of organisational culture.  
20  
21  
22

23 148 Discrepancies in article retention were discussed until a consensus was reached with  
24  
25 149 JB acting as arbitrator in cases of ambiguous study suitability. JH, KL, GL and LT assessed  
26  
27 150 the remaining abstracts against the inclusion criteria followed by a full-text analysis of  
28  
29 151 included articles. Papers evaluating 'hospital performance' were eligible for inclusion if the  
30  
31 152 measures concerned patient outcomes. Articles referring to measures of process interventions,  
32  
33 153 for example, 'adherence to guidelines' or 'medication administration error reporting' were  
34  
35 154 excluded if they did not measure patient outcomes. Articles that only measured healthcare  
36  
37 155 employees' *perceptions* of patient outcomes were excluded, as they were classified as a  
38  
39 156 process rather than outcome measure. Only associations relevant to the research question  
40  
41 157 were included in the analysis.  
42  
43  
44  
45

46 158 Included articles were summarised using a data extraction sheet[24] (Supplementary  
47  
48 159 File B. Data Extraction Sheet). Key information recorded included country, timeframe of data  
49  
50 160 collection, study type, aims, data collection methods, methodology, findings, and  
51  
52 161 implications. Bias of studies was assessed by JH and JB using a Risk of Bias Template  
53  
54 162 (Supplementary File C. Risk of Bias Template), adapted from the Cochrane Handbook for  
55  
56 163 Systematic Reviews, specifically the Cochrane Collaboration's tool for assessing risk of  
57  
58  
59  
60

1  
2  
3 164 bias.[25] The quality of articles was assessed by JH, GL, KL, and LT using Hawker et al.'s  
4  
5 165 (2002) Quality Assessment Tool.[26] Studies were analysed and synthesised according to  
6  
7 166 direction of association and categorisation of patient outcomes.  
8  
9

10 167

## 11 12 13 168 **RESULTS**

### 14 15 169 **Search strategy**

16  
17  
18 170 The results of the search strategy are outlined in Figure 1. A total of 2,049 relevant articles  
19  
20 171 were identified. The Cohen's Kappa for the 5% review of abstracts was 0.2966 (JH:GL) and  
21  
22 172 0.5032 (KL:LT). It is noted that Kappa Paradox 1 occurred in this instance, due to the  
23  
24 173 prevalence of excluded articles decreasing the Kappa value.[27, 28] This was taken into  
25  
26 174 account through calculating the prevalence-adjusted bias-adjusted Kappa (PABAK),  
27  
28 175 increasing the values to a strong (0.84) and moderate (0.76) level of agreement,  
29  
30 176 respectively.[13] Additionally, the prevalence index (PI) was calculated as 0.88 and 0.73 for  
31  
32 177 the pairs of reviewers.  
33  
34

35  
36 178 Two hundred and four abstracts met the inclusion criteria based on the complete  
37  
38 179 review of abstracts. The full text content review of these included articles resulted in sixty-  
39  
40 180 two articles included in the final analysis. A comprehensive table of included articles was  
41  
42 181 generated by JH and edited by KL and LT (Supplementary File D. Summary of Included  
43  
44 182 Articles).  
45  
46

47  
48 183

49  
50  
51 184 **[Insert Figure 1. Search strategy here]**

52  
53 185

### 54 55 56 186 **Study characteristics**

57  
58  
59  
60

1  
2  
3 187 A summary of included study characteristics is provided in Table 1. The majority of studies  
4  
5 188 employed quantitative methods. Only four studies comprised mixed methods, and no study  
6  
7 189 involved purely qualitative methods. Similarly, most studies were observational in nature,  
8  
9  
10 190 with only four intervention studies identified in the final analysis. Of the observational  
11  
12 191 studies, most were classified as cross-sectional. Studies were more commonly conducted in a  
13  
14 192 hospital context, and a US setting. No studies yielding level one evidence, i.e., randomised  
15  
16 193 controlled trials, were identified. The data obtained from the review was heterogeneous, in  
17  
18 194 terms of participants and outcomes (clinically diverse) and in study design (methodologically  
19  
20 195 diverse).[29] Across the studies, organisational and workplace culture, climate, and  
21  
22 196 environment, were defined and measured in a non-standardised way. For example, some  
23  
24 197 studies focussed on broader hospital culture,[30-38] while others assessed staff attitudes and  
25  
26 198 values,[39-42] or safety climate.[43-53] The concept of patient outcomes was also diverse in  
27  
28 199 nature, comprising a variety of specific and broader outcomes and conditions. Due to the  
29  
30 200 heterogeneity of definitions, tools, and variables, quantitative meta-analysis of data was  
31  
32 201 therefore of no value.[54]  
33  
34  
35  
36  
37  
38  
39  
40 203

**Table 1. Descriptive Characteristics of Included Studies**

|                          | Number<br>(%) |
|--------------------------|---------------|
| <b>Method</b>            |               |
| Quantitative             | 58 (93.6)     |
| Qualitative              | 0 (0.0)       |
| Mixed                    | 4 (6.5)       |
| <b>Study design</b>      |               |
| Intervention             | 4 (6.5)       |
| Observational            | 58 (93.6)     |
| Cross-sectional          | 50 (80.7)     |
| Longitudinal             | 10 (16.1)     |
| <b>Level of Evidence</b> |               |
| Level 1                  | 0 (0.0)       |
| Other                    | 62 (100.0)    |

| <b>Setting</b> |           |
|----------------|-----------|
| Hospital       | 55 (88.7) |
| Aged care      | 4 (6.5)   |
| Other          | 3 (4.8)   |
| <b>Country</b> |           |
| USA            | 36 (58.1) |
| Europe         | 11 (17.7) |
| Canada         | 5 (8.1)   |
| Asia           | 4 (6.5)   |
| Australia      | 2 (3.2)   |
| Middle East    | 2 (3.2)   |
| UK             | 2 (3.2)   |

204

205 **Risk of bias**

206 The Cochrane Collaboration's tool for assessing risk of bias is designed for use in clinical  
 207 trials. Our final collection of articles did not contain data from clinical trials, and therefore,  
 208 the tool was deemed an inappropriate method in which to assess risk of bias. A new way of  
 209 assessing risk of bias was established (Supplementary File C) by adapting the Cochrane  
 210 Handbook for Systematic Reviews' definitions of bias to be applicable to quantitative and  
 211 qualitative non-intervention studies.[25] Applying this tool, it became apparent that all  
 212 included articles sustained a risk of bias. It is suggested that classification of articles by  
 213 quality, rather than exclusively by bias, is more appropriate for this class of review.

214

215 **Quality assessment**

216 Over 93% of included studies were observational (Table 1). The Cochrane Handbook for  
 217 Systematic Reviews suggests that observational studies rate as low quality in its Grades of  
 218 Recommendation, Assessment, Development and Evaluation (GRADE) approach to  
 219 assessing the quality of articles.[55] Hawker et al.'s (2002) Quality Assessment Tool[26] was  
 220 deemed more suitable for this review as it is designed to evaluate studies covering a variety  
 221 of research paradigms. The tool developers (Hawker et al., 2002) gave detailed descriptions

222 of what constituted a “good” (4 points), “fair” (3 points), “poor” (2 points) or “very poor” (1  
 223 point) article in each of the following nine categories: abstract and title; introduction and  
 224 aims; method and data; sampling; data analysis; ethics and bias; findings/results;  
 225 transferability/generalisability; and, implications and usefulness, allowing for a potential  
 226 maximum score of 36. Hawker et al. (2002) did not suggest cut-offs for classifying the total  
 227 quality rating of the article, but this has been proposed by other researchers using the Quality  
 228 Assessment Tool.[26] For example, the rule of thumb developed by Lorenc et al. (2014)  
 229 suggests the following quality grading system: “high quality” (30-36 points), “medium  
 230 quality” (24-29 points), and “low quality” (9-24 points).[56] This recommendation was  
 231 modified in the current systematic review where “low quality” was classified as 9-23 points  
 232 to reduce ambiguity. Quality scores ranged from 17-36 across the 62 included studies. Full  
 233 details on quality scores are provided in Table 2. Articles were classified as either high,  
 234 medium or low quality based on these cut-off values. Quality scores are reported in  
 235 Supplementary File D.

236

237 **Table 2. Methodological Rigour and Quality of Included Articles**

| Quality classification* | Points scored on the Hawker et al. (2002) Quality Assessment Tool* | Number of articles classified in each section |
|-------------------------|--------------------------------------------------------------------|-----------------------------------------------|
| High quality            | 30-36                                                              | 39                                            |
| Medium quality          | 24-29                                                              | 21                                            |
| Low quality             | 9-23                                                               | 2                                             |

238 \*adapted from cut-off values determined by Lorenc et al., 2014.[56]

239

240 **Overall findings**

241 We found that organisational and workplace cultures were correlated with patient outcomes  
 242 in over 90% of studies. The majority (74.2%) of associations were classified as ‘positive’,

243 comprising of exclusively positive associations (48.4%), or a mixture of positive associations  
 244 and no associations (25.8%) (Figure 2).

245

246 **[Insert Figure 2: Categorisation of direction of studies (number of studies) here]**

247

248 Specifically, culture was positively associated with system-related patient outcomes  
 249 such as mortality rates,[47, 48, 57-63] failure to rescue,[57, 59, 64], readmission rates,[44,  
 250 51, 65, 66] and adverse events/medication errors[32, 49, 50, 67-70]; wellbeing outcomes  
 251 including, patient satisfaction,[31, 33, 35, 37, 40, 41, 71-80] quality of life,[81] and patient  
 252 mood[81]; and clinical outcomes such as pressure ulcers[32, 46, 82-85] falls,[30, 32, 46, 70,  
 253 83, 86] hospital acquired infections,[32, 39, 43, 84, 87-89] depressive symptoms,[90]  
 254 pulmonary embolism/deep vein thrombosis[46], incontinence,[85] symptom burden at the  
 255 end of life,[60] and physical and mental health status[52] (Figure 3). Table 3 summarises all  
 256 associations by outcome type.

257 Articles showing no significant associations accounted for 8.06% of studies.  
 258 Indeterminate or results comprising both positive and negative associations, made up 19.4%  
 259 of the research. There were no studies presenting ‘negative’ associations (exclusively  
 260 negative associations, or negative associations and no associations).

261

262 **[Insert Figure 3: Key associations between culture and patient outcomes here]**

263

264 **Table 3. Associations by type of outcome**

|  | System-related patient outcomes | Wellbeing outcomes | Clinical outcomes |
|--|---------------------------------|--------------------|-------------------|
|--|---------------------------------|--------------------|-------------------|

|                                           |           |           |          |
|-------------------------------------------|-----------|-----------|----------|
| Exclusively positive associations         | 15 (24.2) | 13 (21.0) | 5 (8.1)  |
| Positive associations and no associations | 8 (12.9)  | 6 (9.7)   | 8 (12.9) |
| No associations                           | 2 (3.2)   | 3 (4.8)   | 1 (1.6)  |
| Negative associations and no associations | 0 (0.0)   | 0 (0.0)   | 0 (0.0)  |
| Exclusively negative associations         | 0 (0.0)   | 0 (0.0)   | 0 (0.0)  |
| Indeterminate or mixed results            | 8 (12.9)  | 4 (6.5)   | 5 (8.1)  |

265

266 **Positive associations**

267 Almost three in four (74.2%) studies reported exclusively positive associations, or a mixture  
 268 of positive associations and no associations, between culture and patient outcomes. For  
 269 example, hospital-based cross-sectional studies found patient mortality rates were nearly 48%  
 270 lower in hospitals with better work environments,[62] and surgical mortality rates were more  
 271 than 60% higher in hospitals with poor work environments.[91] Some studies moved beyond  
 272 ‘better’ and ‘poor’ environments by evaluating *types* of culture positively associated with  
 273 patient outcomes. For example, a ‘human relations’ climate, focusing on flexibility and  
 274 supporting internal resources, and embracing values associated with belonging, trust, and  
 275 cohesion, was also related to enhanced patient satisfaction.[33]

276 Organizational and workplace cultures were also positively associated with patient  
 277 outcomes in contexts other than hospitals. A study of aged-care found that residents in  
 278 facilities with less effective staff cohesion were at significantly greater risk of pressure ulcers  
 279 and incontinence, compared with residents in facilities with more effective cohesion.[85]  
 280 Depressive symptoms in residents were associated with two dimensions of organisational  
 281 culture (proficiency and resistance), and three dimensions of climate (stress, engagement, and  
 282 functionality).[90] Companionate love culture (that is, feelings of affection, caring and

1  
2  
3 283 compassion) in aged-care facilities was positively correlated with patient mood, quality of  
4  
5 284 life, satisfaction and fewer trips to the emergency room.[81] A single study of a community  
6  
7 285 mental health organisation concluded that positive (i.e., supportive and cohesive)  
8  
9  
10 286 organisational culture and climate were strong predictors of physical and mental health status  
11  
12 287 improvements over time, but not changes in quality of life.[52] These findings collectively  
13  
14 288 indicate the importance of a positive organisational and workplace culture for a wide variety  
15  
16 289 of patient outcomes, across settings.

17  
18  
19 290 A small group of studies reported a combination of positive associations and no  
20  
21 291 associations between culture and patient outcomes. One study found no correlation between  
22  
23 292 culture or climate and risk-adjusted outcomes, however, teamwork, communication and  
24  
25 293 collaboration was associated with risk-adjusted morbidity.[47] Another study reported that  
26  
27 294 nurses' perceptions of work environment were significantly related to patient hospitalisation  
28  
29 295 rates, but not with patient satisfaction.[92] Studies that reported mixed positive and no-  
30  
31 296 association results have also been reported in aged care[50, 81] and mental health  
32  
33 297 services.[52]

34  
35  
36  
37 298

38  
39  
40 299 **No associations**

41  
42 300 Not all studies reported associations between culture and patient outcomes. A primary care-  
43  
44 301 based cross-sectional study found no significant associations between team culture and  
45  
46 302 HbA1c level, systolic blood pressure and total cholesterol levels in diabetes mellitus type II  
47  
48 303 patients.[42] Other studies found no association between organisational or workplace culture  
49  
50 304 or climate, and patient satisfaction,[45] performance indexes,[34] prescription errors, rates of  
51  
52 305 adverse events, and patient mortality rates.[93]

53  
54  
55  
56 306  
57  
58  
59  
60



1  
2  
3 307 **Indeterminate studies**  
4

5 308 Over 17% of included articles reported indeterminate or mixed results. ‘Indeterminate’ was  
6  
7 309 used in cases where the classification of cultures as positive or negative could not be  
8  
9  
10 310 discerned. For example, higher scores on group culture measures, that is those that  
11  
12 311 emphasised teamwork, cohesiveness and participation, were associated with significantly  
13  
14 312 lower rates of survival without major morbidity, whereas in one study, higher scores on  
15  
16 313 hierarchical culture measures were associated with higher rates of survival without major  
17  
18 314 morbidity.[63] ‘Mixed’ refers to both positive and negative associations presented in the one  
19  
20 315 study. A study reported that ICUs in which nurses perceived the organisational climate as  
21  
22 316 positive had higher rates of central line associated bloodstream infections (CLBSI), but were  
23  
24 317 39% less likely to develop a catheter-associated urinary tract infection (CAUTI).[84] In  
25  
26 318 another study, patient falls with injury were positively related to a developmental culture,  
27  
28 319 characterised by dynamic and innovative environments that value individual initiatives and  
29  
30 320 growth, and negatively related to group culture, which is characterised by warm, caring  
31  
32 321 environments that value tradition and loyalty.[30]  
33  
34  
35  
36  
37  
38  
39

40 323 **Intervention studies**  
41

42 324 Our review included four intervention studies. A systematic review on culture and  
43  
44 325 performance (rather than outcomes) completed five years prior, included only two  
45  
46 326 interventions, indicating growing researcher attention in this area.[2] A study in rural/small  
47  
48 327 hospitals which implemented 12 nurse-friendly criteria to create a positive work environment  
49  
50 328 observed positive changes in nurses’ perception of their work environment and improvements  
51  
52 329 in quality of care in participating hospitals post-intervention.[83] A hospital-based  
53  
54 330 intervention study to change organisational culture on frequency of staff handwashing did not  
55  
56  
57  
58  
59  
60

1  
2  
3 331 improve rates of methicillin-resistant *Staphylococcus aureus* (MRSA) in two hospitals, but  
4  
5 332 rates of vancomycin-resistant enterococci (VRE) were significantly reduced in the  
6  
7 333 intervention hospital during implementation.[87] A prominent interventional study, the UK  
8  
9 334 Safer Patients Initiative, indicated that while there was a small improvement in staff attitudes  
10  
11 335 to organisational climate in intervention hospitals, the intervention had no significant effect  
12  
13 336 on patient safety outcomes, measured by the proportion of prescription errors, rates of  
14  
15 337 adverse events, and mortality rates.[93] The fourth intervention study was based in a single  
16  
17 338 hospital in Sweden. The study found that patients' perceptions of work environment were a  
18  
19 339 significant predictor of patients' satisfaction with quality of care.[71]  
20  
21  
22  
23  
24  
25

26 340

## 27 341 **DISCUSSION**

28  
29 342 We synthesised a large literature with diverse variables which attempted to measure or study  
30  
31 343 healthcare cultures, or intervene to create enhanced organisational and workplace cultures,  
32  
33 344 across multiple healthcare settings, mostly hospitals, in a range of countries, chiefly north  
34  
35 345 America, Europe and Australasia. The complexity of the synthesising task should not be  
36  
37 346 underestimated in reviews of this kind (see also Greenhalgh's work synthesising research on  
38  
39 347 diffusion of innovation [94]). The studies we report on undertook work on settings best  
40  
41 348 described as CASs, in which the healthcare system is defined as a layered web of agents  
42  
43 349 interacting dynamically across space and time, producing emergent outcomes.[14, 22] CASs  
44  
45 350 are hard to change, and resist simple, linear improvement strategies. The studies themselves  
46  
47 351 involved nuanced choices in types of measures, multiple mechanisms for studying or  
48  
49 352 intervening, and variable ways of reporting their methods and results.  
50  
51  
52

53 353 Despite the challenges in combining and assessing disparate research, we found  
54  
55 354 confirmatory evidence for previous work[2, 16, 21], which suggested that there were positive  
56  
57  
58  
59  
60

1  
2  
3 355 linkages between cultures in healthcare settings and patient outcomes. In short, healthcare  
4  
5 356 organisational cultures are related to patient outcomes in the way people have generally  
6  
7 357 assumed they are, and in the direction our hypothesis suggested. Thus, we found  
8  
9  
10 358 confirmatory evidence supporting our hypothesis.

11  
12 359

### 13 14 15 360 **Study strengths and weaknesses**

16  
17  
18 361 The number of included articles in this review was relatively high, providing comprehensive  
19  
20 362 coverage of the research topic. An overarching account of the association between  
21  
22 363 organisational and workplace culture and patient outcomes was made possible by having a  
23  
24 364 broad scope of review, including multiple types of healthcare settings, and considering  
25  
26 365 patient outcomes as both an all-encompassing concept as well as considering more specific  
27  
28 366 outcomes. However, the broad scope of the review poses a challenge, as there were inherent  
29  
30 367 limitations whereby terms such as ‘culture’, ‘climate’ and ‘environment’ were inconsistently  
31  
32 368 defined or measured. The heterogeneity of data complicated attempts to draw comparisons  
33  
34 369 across studies, and conclusions. Nevertheless, we rigorously assessed bias and study quality,  
35  
36 370 and the study results point in the same direction.

37  
38  
39  
40 371 Although this review set out to assess the association between organisational and  
41  
42 372 workplace culture and patient outcomes across a variety of health settings, most studies were  
43  
44 373 conducted in a hospital environment. We propose that more research is needed in other  
45  
46 374 healthcare settings such as aged and community care. Only four studies employed  
47  
48 375 interventional designs in testing out chosen associations. More rigorous intervention studies  
49  
50 376 aimed at promoting change in organisational culture could provide valuable information on  
51  
52 377 how improvements in organisational culture can affect outcomes for patients.

53  
54  
55  
56 378  
57  
58  
59  
60

1  
2  
3 379 **CONCLUSION**  
4

5 380 Studies examining culture are common. Fewer explore linkages between cultures and patient  
6  
7 381 outcomes. There are no RCTs, and few intervention studies with strong designs are reported.  
8  
9

10 382 The trend for most studies is to find that positive cultures are related to better outcomes for  
11  
12 383 patients. Better quality studies, and those outside of hospitals, would provide confirming or  
13  
14 384 disconfirming evidence for our synthesis.  
15  
16

17  
18 385

19  
20 386 **Acknowledgements**  
21

22  
23 387 The authors would like to thank Jeremy Cullis, Clinical Librarian, Macquarie University, for  
24  
25 388 proving his expertise on the use of academic databases and for reviewing our search strategy.  
26

27 389 We also thank Ms Hsuen P. Ting, Biostatistician, Australian Institute of Health Innovation,  
28  
29 390 Macquarie University, for providing advice, and conducting the statistical analysis of the 5%  
30  
31 391 library analyses.  
32  
33

34  
35 392

36  
37 393 **Competing Interests**  
38

39 394 The authors declare no conflicts of interest.  
40  
41

42  
43 395

44  
45 396 **Funding**  
46

47  
48 397 This work is supported by NHMRC Program Grant 1054146, NHMRC Partnership Centre in  
49  
50 398 Health Systems Sustainability Grant 9100002, and other grants held by JB.  
51  
52

53  
54 399

55  
56 400 **Data Sharing Statement**  
57  
58  
59  
60

1  
2  
3 401 No additional data available.  
4  
5  
6 402  
7  
8 403 **Authors' Contributions**  
9

10  
11 404 JB led the study and provided a conceptualisation of the topic to the team, and acted as an  
12  
13 405 arbitrator and advisor where necessary. JH, KL, GL and LT did the abstract and full-text  
14  
15 406 reviews of the articles. All authors contributed to the writing of the drafts, and agree with the  
16  
17 407 final version.  
18  
19

20 408

21  
22  
23 409 **Amendments**  
24

25  
26 410 Any minor adjustments to the protocol have been documented in this systematic review.  
27  
28  
29  
30  
31  
32  
33  
34  
35  
36  
37  
38  
39  
40  
41  
42  
43  
44  
45  
46  
47  
48  
49  
50  
51  
52  
53  
54  
55  
56  
57  
58  
59  
60

## 411 REFERENCES

412

- 413 1. Hesselink G, Vernooij-Dassen M, Pijnenborg L, et al. Organizational culture: an important  
414 context for addressing and improving hospital to community patient discharge. *Med*  
415 *Care* 2013;51:90-98.
- 416 2. Parmelli E, Flodgren G, Beyer F, et al. The effectiveness of strategies to change  
417 organisational culture to improve healthcare performance: a systematic review.  
418 *Implement Sci* 2011;6(1):1-8. doi: 10.1186/1748-5908-6-33.
- 419 3. Scott T, Mannion R, Davies H, et al. The quantitative measurement of organizational  
420 culture in health care: a review of the available instruments. *Health Serv Res*  
421 2003;38(3):923-45. doi: 10.1111/1475-6773.00154.
- 422 4. Mannion R, Davies H, Marshall M. Cultures for Performance in Health Care. Buckingham,  
423 UK: Open University Press 2005.
- 424 5. Braithwaite J, Westbrook MT, Iedema R, et al. A tale of two hospitals: assessing cultural  
425 landscapes and compositions. *Social science & medicine (1982)* 2005;60(5):1149-62.  
426 doi: 10.1016/j.socscimed.2004.06.046.
- 427 6. Braithwaite J, Hyde P, Pope C. Culture and Climate in Health Care Organizations.  
428 Basingstoke, London, England: Palgrave Macmillan 2010:1-218.
- 429 7. Braithwaite J. A lasting legacy from Tony Blair? NHS culture change. *J R Soc Med*  
430 2011;104(2):87-89. doi: 10.1258/jrsm.2010.100364.
- 431 8. Schein E. Organizational Culture and Leadership. San Francisco, CA: Jossey-Bass 2004.
- 432 9. Wagner C, Mannion R, Hammer A, et al. The associations between organizational culture,  
433 organizational structure and quality management in European hospitals. *Int J Qual*  
434 *Health Care* 2014;26(Suppl 1):74-80.

- 1  
2  
3 435 10. Ashkanasy N, Wilderom C, Peterson M. Handbook of Organizational Culture and  
4  
5 436 Climate. Thousand Oaks, CA: Sage 2000.  
6  
7 437 11. Jacobs R, Mannion R, Davies H, et al. The relationship between organisational culture  
8  
9 438 and performance in acute hospitals. *Social science & medicine (1982)* 2013;76:115-  
10  
11 439 25.  
12  
13 440 12. Callen J, Braithwaite J, Westbrook JI. The importance of medical and nursing sub-  
14  
15 441 cultures in the implementation of clinical information systems. *Methods Inf Med*  
16  
17 442 2009;48(2):196-202. doi: 10.3414/me9212.  
18  
19 443 13. McHugh ML. Interrater reliability: the kappa statistic. *Biochemia Medica*  
20  
21 444 2012;22(3):276-82.  
22  
23 445 14. Braithwaite J, Clay-Williams R, Nugus P, et al. Health care as a complex adaptive  
24  
25 446 system. In: Hollbagel E, Braithwaite J, Wears R, eds. Resilient Health Care. Farnham,  
26  
27 447 Surrey, UK: Ashgate Publishing Ltd 2013.  
28  
29 448 15. Scott T, Mannion R, Davies HT, et al. Implementing culture change in health care: theory  
30  
31 449 and practice. *Int J Qual Health Care* 2003;15(2):111-8.  
32  
33 450 16. MacDavitt K, Chou SS, Stone PW. Organizational climate and health care outcomes. *Jt*  
34  
35 451 *Comm J Qual Patient Saf* 2007;33(11 Suppl):45-56.  
36  
37 452 17. Donabedian A. The quality of care. How can it be assessed? *Jama* 1988;260(12):1743-8.  
38  
39 453 18. Viswanathan M, Ansari M, Berkman N, et al. Assessing the Risk of Bias of Individual  
40  
41 454 Studies in Systematic Reviews of Health Care Intervention: Agency for Healthcare  
42  
43 455 Research and Quality Methods Guide for Comparative Effectiveness Reviews, 2012.  
44  
45 456 19. Braithwaite J, Herkes J, Ludlow K, et al. The association between organisational and  
46  
47 457 workplace cultures, and patient outcomes: systematic review protocol. *BMJ Open*  
48  
49 458 2016;6(12):e013758. doi: 10.1136/bmjopen-2016-013758.  
50  
51  
52  
53  
54  
55  
56  
57  
58  
59  
60

- 1  
2  
3 459 20. Gershon RRM, Stone PW, Zeltseri M, et al. Organizational climate and nurse health  
4  
5 460 outcomes in the United States: a systematic review. *Ind Health* 2007;45(5):622-36.  
6  
7 461 doi: 10.2486/indhealth.45.622.  
8  
9  
10 462 21. Scott T, Mannion R, Marshall M, et al. Does organisational culture influence health care  
11  
12 463 performance? A review of the evidence. *Journal of health services research & policy*  
13  
14 464 2003;8(2):105-17. doi: 10.1258/135581903321466085.  
15  
16 465 22. Plsek PE, Greenhalgh T. The challenge of complexity in health care. *BMJ* 2001;323:625-  
17  
18 466 28. doi: 10.1136/bmj.323.7313.625.  
19  
20  
21 467 23. Shamseer L, Moher D, Clarke M, et al. Preferred reporting items for systematic review  
22  
23 468 and meta-analysis protocols (PRISMA-P) 2015: elaboration and explanation. *BMJ*  
24  
25 469 2015;349:g7647. doi: 10.1136/bmj.g7647.  
26  
27 470 24. Taylor N, Clay-Williams R, Hogden E, et al. High performing hospitals: a qualitative  
28  
29 471 systematic review of associated factors and practical strategies for improvement. *Bmc*  
30  
31 472 *Health Services Research* 2015;15 doi: 10.1186/s12913-015-0879-z.  
32  
33  
34 473 25. Higgins J, Altman D, Sterne J. Chapter 8. Assessing risk of bias in included studies. In:  
35  
36 474 Higgins J, Green S, eds. *Cochrane Handbook for Systematic Reviews of Interventions*  
37  
38 475 *Version 510: The Cochrane Collaboration* 2011.  
39  
40  
41 476 26. Hawker S, Payne S, Kerr C, et al. Appraising the evidence: reviewing disparate data  
42  
43 477 systematically. *Qual Health Res* 2002;12(9):1284-99.  
44  
45 478 27. Byrt T, Bishop J, Carlin J. Bias, prevalence and kappa. *J Clin Epidemiol* 1993;46(5):423-  
46  
47 479 29.  
48  
49 480 28. Feinstein A, Cicchetti D. High agreement but low kappa: the problems of two paradoxes.  
50  
51 481 *J Clin Epidemiol* 1990;43:543-48.  
52  
53  
54  
55  
56  
57  
58  
59  
60



- 1  
2  
3 482 29. Deeks JJ, Higgins JP, Altman DG. Chapter 9: 9.5.1 What is heterogeneity? In: Higgins J,  
4  
5 483 Green S, eds. *Cochrane Handbook for Systematic Reviews of Interventions* Version  
6  
7 484 510: The Cochrane Collaboration 2011.
- 8  
9  
10 485 30. Brewer BB. Relationships among teams, culture, safety, and cost outcomes. *West J Nurs*  
11  
12 486 *Res* 2006;28(6):641-53. doi: 10.1177/0193945905282303.
- 13  
14 487 31. Coustasse A, Mains DA, Lykens K, et al. Organizational culture in a terminally ill  
15  
16 488 hospital. *J Hosp Mark Public Relations* 2008;18(1):39-60.
- 17  
18 489 32. Dubois C-A, d'Amour D, Tchouaket E, et al. Associations of patient safety outcomes with  
19  
20 490 models of nursing care organization at unit level in hospitals. *IJQHC* 2013;25(2):110-  
21  
22 491 17.
- 23  
24  
25 492 33. Ancarani A, Di Mauro C, Giammanco MD. Patient satisfaction, managers' climate  
26  
27 493 orientation and organizational climate. *IJOPM* 2011;31(3):224-50. doi:  
28  
29 494 10.1108/01443571111111900.
- 30  
31  
32 495 34. Nasirpour AA, Gohari MR, Moradi S. The relationship of centralization, organizational  
33  
34 496 culture and performance indexes in teaching hospitals affiliated to tehran university of  
35  
36 497 medical sciences. *Acta Medica Iranica* 2010;48(5):326-31.
- 37  
38 498 35. Nowinski CJ, Becker SM, Reynolds KS, et al. The impact of converting to an electronic  
39  
40 499 health record on organizational culture and quality improvement. *Int J Med Inform*  
41  
42 500 2007;76(Suppl 1):174-83.
- 43  
44  
45 501 36. Shortell SM, Jones RH, Rademaker AW, et al. Assessing the impact of total quality  
46  
47 502 management and organizational culture on multiple outcomes of care for coronary  
48  
49 503 artery bypass graft surgery patients. *Med Care* 2000;38(2):207-17. doi:  
50  
51 504 10.1097/00005650-200002000-00010.
- 52  
53  
54  
55  
56  
57  
58  
59  
60

- 1  
2  
3 505 37. Zhou P, Bundorf K, Le Chang J, et al. Organizational culture and its relationship with  
4  
5 506 hospital performance in public hospitals in China. *Health Serv Res* 2011;46(6 Pt  
6  
7 507 2):2139-60.  
8  
9  
10 508 38. Maben J, Adams M, Peccei R, et al. 'Poppets and parcels': the links between staff  
11  
12 509 experience of work and acutely ill older peoples' experience of hospital care. *Int J*  
13  
14 510 *Older People Nurs* 2012;7(2):83-94.  
15  
16 511 39. Fedorowsky R, Peles-Bortz A, Masarwa S, et al. Carbapenem-resistant  
17  
18 512 Enterobacteriaceae carriers in acute care hospitals and postacute-care facilities: the  
19  
20 513 effect of organizational culture on staff attitudes, knowledge, practices, and infection  
21  
22 514 acquisition rates. *Am J Infect Control* 2015;43(9):935-39. doi:  
23  
24 515 10.1016/j.ajic.2015.05.014.  
25  
26  
27 516 40. Saame I, Reino A, Vadi M. Organizational culture based on the example of an Estonian  
28  
29 517 hospital. *J Health Organ Manag* 2011;25(5):526-48.  
30  
31  
32 518 41. Ancarani A, Di Mauro C, Giammanco MD. How are organisational climate models and  
33  
34 519 patient satisfaction related? A competing value framework approach. *Social science &*  
35  
36 520 *medicine (1982)* 2009;69(12):1813-8. doi: 10.1016/j.socscimed.2009.09.033.  
37  
38  
39 521 42. Bosch M, Dijkstra R, Wensing M, et al. Organizational culture, team climate and diabetes  
40  
41 522 care in small office-based practices. *BMC Health Serv Res* 2008;8:180. doi:  
42  
43 523 10.1186/1472-6963-8-180.  
44  
45 524 43. Fan CJ, Pawlik TM, Daniels T, et al. Association of Safety Culture with Surgical Site  
46  
47 525 Infection Outcomes. *Journal of the American College of Surgeons* 2016;222(2):122-  
48  
49 526 28. doi: 10.1016/j.jamcollsurg.2015.11.008.  
50  
51  
52 527 44. Hansen LO, Williams MV, Singer SJ. Perceptions of hospital safety climate and  
53  
54 528 incidence of readmission. *Health Serv Res* 2011;46(2):596-616.  
55  
56  
57  
58  
59  
60

- 1  
2  
3 529 45. Ausserhofer D, Schubert M, Desmedt M, et al. The association of patient safety climate  
4  
5 530 and nurse-related organizational factors with selected patient outcomes: a cross-  
6  
7 531 sectional survey. *Int J Nurs Stud* 2013;50(2):240-52. doi:  
8  
9 532 10.1016/j.ijnurstu.2012.04.007.  
10  
11 533 46. Taylor JA, Dominici F, Agnew J, et al. Do nurse and patient injuries share common  
12  
13 534 antecedents? An analysis of associations with safety climate and working conditions.  
14  
15 535 *BMJ Qual Saf* 2012;21(2):101-11. doi: 10.1136/bmjqs-2011-000082.  
16  
17 536 47. Davenport DL, Henderson WG, Mosca CL, et al. Risk-adjusted morbidity in teaching  
18  
19 537 hospitals correlates with reported levels of communication and collaboration on  
20  
21 538 surgical teams but not with scale measures of teamwork climate, safety climate, or  
22  
23 539 working conditions. *JACS* 2007;205(6):778-84. doi:  
24  
25 540 10.1016/j.jamcollsurg.2007.07.039.  
26  
27 541 48. Kelly DM, Kutney-Lee A, McHugh MD, et al. Impact of critical care nursing on 30-day  
28  
29 542 mortality of mechanically ventilated older adults. *Crit Care Med* 2014;42(5):1089-95.  
30  
31 543 49. Mardon RE, Khanna K, Sorra J, et al. Exploring relationships between hospital patient  
32  
33 544 safety culture and adverse events. *Journal of patient safety* 2010;6(4):226-32. doi:  
34  
35 545 10.1097/PTS.0b013e3181fd1a00.  
36  
37 546 50. Singer S, Lin S, Falwell A, et al. Relationship of safety climate and safety performance in  
38  
39 547 hospitals. *Health Serv Res* 2009;44(2 Pt 1):399-421. doi: 10.1111/j.1475-  
40  
41 548 6773.2008.00918.x.  
42  
43 549 51. Ma C, McHugh MD, Aiken LH. Organization of hospital nursing and 30-day  
44  
45 550 readmissions in Medicare patients undergoing surgery. *Med Care* 2015;53(1):65-70.  
46  
47 551 52. Morris A, Bloom JR, Kang S. Organizational and individual factors affecting consumer  
48  
49 552 outcomes of care in mental health services. *Adm Policy Ment Health* 2007;34(3):243-  
50  
51 553 53. doi: 10.1007/s10488-006-0104-9.  
52  
53  
54  
55  
56  
57  
58  
59  
60

- 1  
2  
3 554 53. Kutney-Lee A, Stimpfel AW, Sloane DM, et al. Changes in patient and nurse outcomes  
4 associated with magnet hospital recognition. *Med Care* 2015;53(6):550-57. doi:  
5 555  
6 10.1097/MLR.0000000000000355.  
7 556  
8  
9 557 54. Haidich AB. Meta-analysis in medical research. *Hippokratia* 2010;14(Suppl 1):29-37.  
10  
11 558 55. Schünemann HJ, Oxman AD, Vist GE, et al. Chapter 12: 12.1.1 Interpreting results and  
12 drawing conclusions. In: Higgins J, Green S, eds. *Cochrane Handbook for Systematic*  
13 559 *Reviews of Interventions Version 510: The Cochrane Collaboration 2011*.  
14 560  
15 561 56. Lorenc T, Petticrew M, Whitehead M, et al. Appendix 5. Quality assessment for the  
16 562 systematic review of qualitative evidence. *Crime, fear of crime and mental health:*  
17 563 *synthesis of theory and systematic reviews of interventions and qualitative evidence*.  
18 564 Southampton, UK: NIHR Journals Library, 2014.  
19  
20 565 57. Aiken LH, Buchan J, Ball J, et al. Transformative impact of Magnet designation: England  
21 566 case study. *J Clin Nurs* 2008;17(24):3330-37. doi: 10.1111/j.1365-  
22 567 2702.2008.02640.x.  
23  
24 568 58. Bradley EH, Curry LA, Spatz ES, et al. Hospital strategies for reducing risk-standardized  
25 569 mortality rates in acute myocardial infarction. *Ann Intern Med* 2012;156(9):618-26.  
26  
27 570 59. Kutney-Lee A, Brennan CW, Meterko M, et al. Organization of nursing and quality of  
28 571 care for veterans at the end of life. *J Pain Symptom Manage* 2015;49(3):570-77. doi:  
29 572 10.1016/j.jpainsymman.2014.07.002.  
30  
31 573 60. Estabrooks CA, Hoben M, Poss JW, et al. Dying in a nursing home: treatable symptom  
32 574 burden and its link to modifiable features of work context. *J Am Med Dir Assoc*  
33 575 2015;16(6):515-20. doi: 10.1016/j.jamda.2015.02.007.  
34  
35 576 61. Aiken LH, Cimiotti JP, Sloane DM, et al. Effects of nurse staffing and nurse education on  
36 577 patient deaths in hospitals with different nurse work environments. *Med Care*  
37 578 2011;49(12):1047-53.  
38  
39  
40  
41  
42  
43  
44  
45  
46  
47  
48  
49  
50  
51  
52  
53  
54  
55  
56  
57  
58  
59  
60

- 1  
2  
3 579 62. Cho E, Sloane DM, Eun-Young K, et al. Effects of nurse staffing, work environments,  
4  
5 580 and education on patient mortality: an observational study. *Int J Nurs Stud*  
6  
7 581 2015;52(2):535-42. doi: 10.1016/j.ijnurstu.2014.08.006.  
8  
9  
10 582 63. Mahl S, Lee SK, Baker GR, et al. The Association of organizational culture and quality  
11  
12 583 improvement implementation with neonatal outcomes in the NICU. *J Pediatr Health*  
13  
14 584 *Care* 2015;29(5):435-41. doi: 10.1016/j.pedhc.2015.01.011.  
15  
16 585 64. Aiken LH, Shang J, Xue Y, et al. Hospital use of agency-employed supplemental nurses  
17  
18 586 and patient mortality and failure to rescue. *Health Serv Res* 2013;48(3):931-48.  
19  
20  
21 587 65. Carthon JMB, Lasater KB, Sloane DM, et al. The quality of hospital work environments  
22  
23 588 and missed nursing care is linked to heart failure readmissions: a cross-sectional study  
24  
25 589 of US hospitals. *BMJ Qual Saf* 2015;24(4):255-63. doi: 10.1136/bmjqs-2014-003346.  
26  
27  
28 590 66. McHugh MD, Ma CJ. Hospital nursing and 30-day readmissions among Medicare  
29  
30 591 patients with heart failure, acute myocardial infarction, and pneumonia. *Med Care*  
31  
32 592 2013;51(1):52-59. doi: 10.1097/MLR.0b013e3182763284.  
33  
34 593 67. Weinberg DB, Avgar AC, Sugrue NM, et al. The importance of a high-performance work  
35  
36 594 environment in hospitals. *Health Serv Res* 2013;48(1):319-32. doi: 10.1111/j.1475-  
37  
38 595 6773.2012.01438.x.  
39  
40  
41 596 68. Chang Y, Mark B. Effects of learning climate and registered nurse staffing on medication  
42  
43 597 errors. *Nurs Res* 2011;60(1):32-39. doi: 10.1097/NNR.0b013e3181ff73cc.  
44  
45 598 69. Duffield C, Diers D, O'Brien-Pallas L, et al. Nursing staffing, nursing workload, the work  
46  
47 599 environment and patient outcomes. *Appl Nurs Res* 2011;24(4):244-55. doi:  
48  
49 600 10.1016/j.apnr.2009.12.004.  
50  
51  
52 601 70. Prezerakos P, Galanis P, Moisoglou I. The work environment of haemodialysis nurses  
53  
54 602 and its impact on patients' outcomes. *Int J Nurs Pract* 2015;21(2):132-40. doi:  
55  
56 603 10.1111/ijn.12223.  
57  
58  
59  
60

- 1  
2  
3 604 71. Arnetz JE, Arnetz BB. The development and application of a patient satisfaction  
4  
5 605 measurement system for hospital-wide quality improvement. *International Journal*  
6  
7 606 *for Quality in Health Care* 1996;8(6):555-66.  
8  
9  
10 607 72. Tervo-Heikkinen T, Partanen P, Aalto P, et al. Nurses' work environment and nursing  
11  
12 608 outcomes: a survey study among Finnish university hospital registered nurses. *Int J*  
13  
14 609 *Nurs Pract* 2008;14(5):357-65.  
15  
16 610 73. Tzeng HM, Ketefian S, Redman RW. Relationship of nurses' assessment of  
17  
18 611 organizational culture, job satisfaction, and patient satisfaction with nursing care. *Int J*  
19  
20 612 *Nurs Stud* 2002;39(1):79-84.  
21  
22  
23 613 74. Tei-Tominaga M, Sato F. Effect of nurses' work environment on patient satisfaction: a  
24  
25 614 cross-sectional study of four hospitals in Japan. *JJNS* 2016;13(1):105-13. doi:  
26  
27 615 10.1111/jjns.12091.  
28  
29  
30 616 75. Greenslade JH, Jimmieson NL. Organizational factors impacting on patient satisfaction: a  
31  
32 617 cross sectional examination of service climate and linkages to nurses' effort and  
33  
34 618 performance. *Int J Nurs Pract* 2011;48(10):1188-98. doi:  
35  
36 619 10.1016/j.ijnurstu.2011.04.004.  
37  
38  
39 620 76. Warren N, Hodgson M, Craig T, et al. Employee working conditions and healthcare  
40  
41 621 system performance: the veterans health administration experience. *J Occup Env Med*  
42  
43 622 2007;49(4):417-29. doi: 10.1097/JOM.0b013e31803b94ce.  
44  
45  
46 623 77. You L-M, Aiken LH, Sloane DM, et al. Hospital nursing, care quality, and patient  
47  
48 624 satisfaction: cross-sectional surveys of nurses and patients in hospitals in China and  
49  
50 625 Europe. *Int J Nurs Stud* 2013;50(2):154-61. doi: 10.1016/j.ijnurstu.2012.05.003.  
51  
52  
53 626 78. Kutney-Lee A, McHugh MD, Sloane DM, et al. Nursing: a key to patient satisfaction.  
54  
55 627 *Health Aff* 2009;28(4):W669-W77. doi: 10.1377/hlthaff.28.4.w669.  
56  
57  
58  
59  
60

- 1  
2  
3 628 79. Scotti DJ, Harmon J, Behson SJ. Links among high-performance work environment,  
4  
5 629 service quality, and customer satisfaction: an extension to the healthcare sector. *Int J*  
6  
7 630 *Healthc Manag* 2007;52(2):109-24.  
8  
9  
10 631 80. Shortell SM, O'Brien JL, Carman JM, et al. Assessing the impact of continuous quality  
11  
12 632 improvement/total quality management: concept versus implementation. *Health Serv*  
13  
14 633 *Res* 1995;30(2):377-401.  
15  
16 634 81. Barsade SG, O'Neill OA. What's love got to do with it? A longitudinal study of the  
17  
18 635 culture of companionate love and employee and client outcomes in a long-term care  
19  
20 636 setting. *ASQ* 2014;59(4):551-98.  
21  
22  
23 637 82. Ma CJ, Park SH. Hospital Magnet status, unit work environment, and pressure ulcers. *J*  
24  
25 638 *Nurs Scholarsh* 2015;47(6):565-73. doi: 10.1111/jnu.12173.  
26  
27  
28 639 83. Meraviglia M, Grobe S, Tabone S, et al. Nurse-friendly hospital project - Enhancing  
29  
30 640 nurse retention and quality of care. *JNCQ* 2008;23(4):305-13.  
31  
32 641 84. Stone WP, Mooney-Kane LC, Larson GE, et al. Nurse working conditions and patient  
33  
34 642 safety outcomes. *Med Care* 2007;45(6):571-78. doi:  
35  
36 643 10.1097/MLR.0b013e3180383667.  
37  
38  
39 644 85. Temkin-Greener H, Cai SB, Zheng NT, et al. Nursing home work environment and the  
40  
41 645 risk of pressure ulcers and incontinence. *Health Serv Res* 2012;47(3):1179-200. doi:  
42  
43 646 10.1111/j.1475-6773.2011.01353.x.  
44  
45  
46 647 86. Purdy N, Laschinger HKS, Finegan J, et al. Effects of work environments on nurse and  
47  
48 648 patient outcomes. *J Nurs Manag* 2010;18(8):901-13. doi: 10.1111/j.1365-  
49  
50 649 2834.2010.01172.x.  
51  
52 650 87. Larson EL, Early E, Cloonan P, et al. An organizational climate intervention associated  
53  
54 651 with increased handwashing and decreased nosocomial infections. *Behavioral*  
55  
56 652 *medicine (Washington, DC)* 2000;26(1):14-22. doi: 10.1080/08964280009595749.  
57  
58  
59  
60

- 1  
2  
3 653 88. Virtanen M, Kurvinen T, Terho K, et al. Work hours, work stress, and collaboration  
4  
5 654 among ward staff in relation to risk of hospital-associated infection among patients.  
6  
7 655 *Med Care* 2009;47(3):310-18.  
8  
9  
10 656 89. Borg MA, Waisfisz B, Frank U. Quantitative assessment of organizational culture within  
11  
12 657 hospitals and its relevance to infection prevention and control strategies. *J Hosp Infect*  
13  
14 658 2015;90(1):75-77. doi: 10.1016/j.jhin.2014.12.015.  
15  
16 659 90. Cassie KM, Cassie WE. Organizational and individual conditions associated with  
17  
18 660 depressive symptoms among nursing home residents over time. *Gerontologist*  
19  
20 661 2012;52(6):812-21.  
21  
22  
23 662 91. Aiken LH, Clarke SP, Sloane DM, et al. Effects of hospital care environment on patient  
24  
25 663 mortality and nurse outcomes. *The Journal of nursing administration* 2008;38(5):223-  
26  
27 664 9. doi: 10.1097/01.NNA.0000312773.42352.d7.  
28  
29  
30 665 92. Gardner JK, Thomas-Hawkins C, Fogg L, et al. The relationships between nurses'  
31  
32 666 perceptions of the hemodialysis unit work environment and nurse turnover, patient  
33  
34 667 satisfaction, and hospitalizations. *Nephrol Nurs J* 2007;34(3):271-82.  
35  
36 668 93. Benning A, Ghaleb M, Suokas A, et al. Large scale organisational intervention to  
37  
38 669 improve patient safety in four UK hospitals: mixed method evaluation. *BMJ* 2011;342  
39  
40 670 doi: 10.1136/bmj.d195.  
41  
42  
43 671 94. Greenhalgh T, Robert G, Macfarlane F, et al. Diffusion of innovations in service  
44  
45 672 organizations: systematic review and recommendations. *Milbank Q* 2004;82(4):581-  
46  
47 673 629. doi: 10.1111/j.0887-378X.2004.00325.x.  
48  
49  
50 674



1  
2  
3  
4  
5  
6  
7  
8  
9  
10  
11  
12  
13  
14  
15  
16  
17  
18  
19  
20  
21  
22  
23  
24  
25  
26  
27  
28  
29  
30  
31  
32  
33  
34  
35  
36  
37  
38  
39  
40  
41  
42  
43  
44  
45  
46  
47  
48  
49  
50  
51  
52  
53  
54  
55  
56  
57  
58  
59  
60

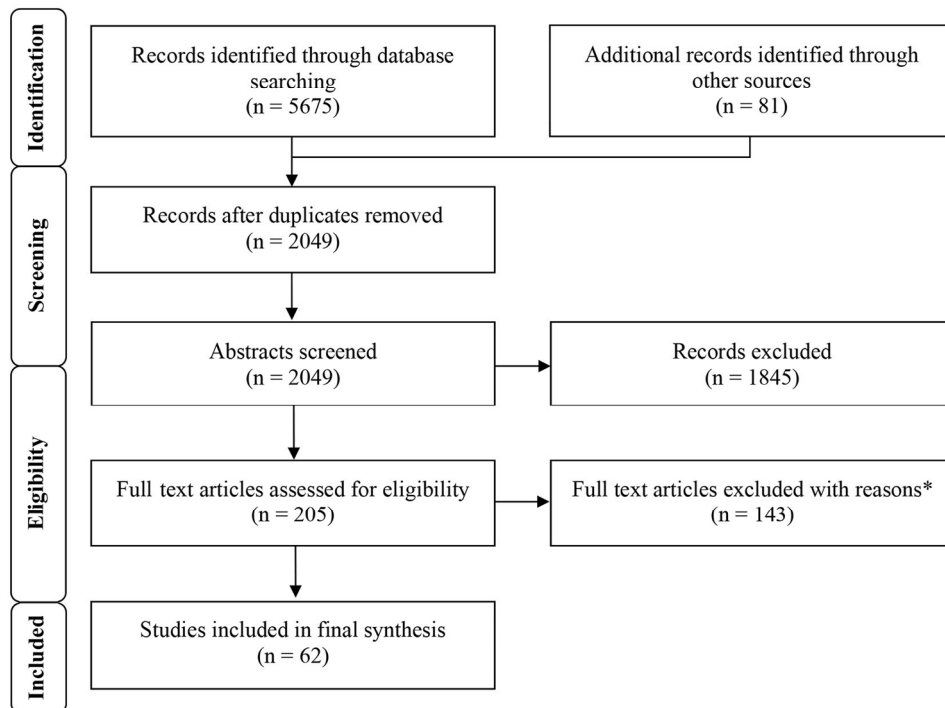

Search strategy

147x108mm (300 x 300 DPI)

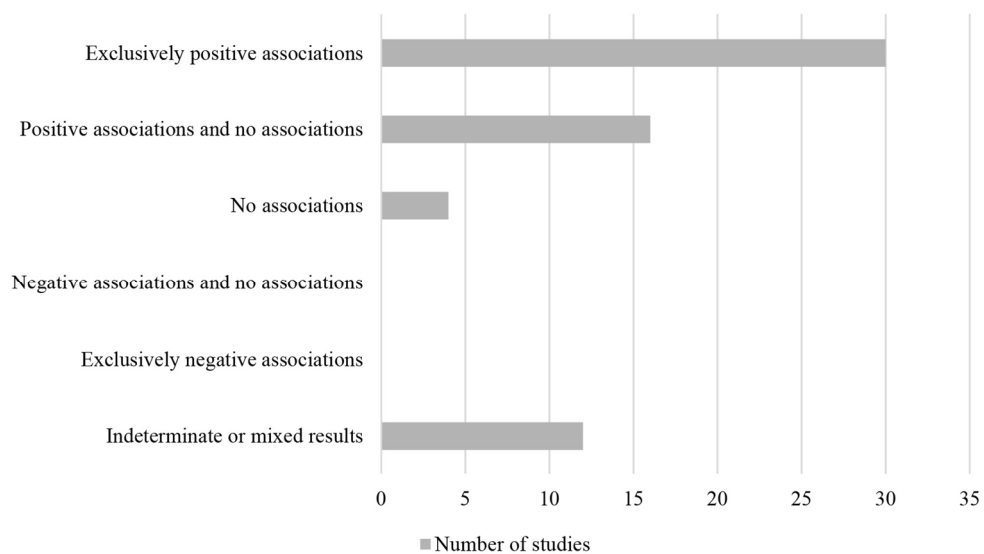

Categorisation of direction of studies (number of studies)

175x99mm (300 x 300 DPI)

review only

1  
2  
3  
4  
5  
6  
7  
8  
9  
10  
11  
12  
13  
14  
15  
16  
17  
18  
19  
20  
21  
22  
23  
24  
25  
26  
27  
28  
29  
30  
31  
32  
33  
34  
35  
36  
37  
38  
39  
40  
41  
42  
43  
44  
45  
46  
47  
48  
49  
50  
51  
52  
53  
54  
55  
56  
57  
58  
59  
60

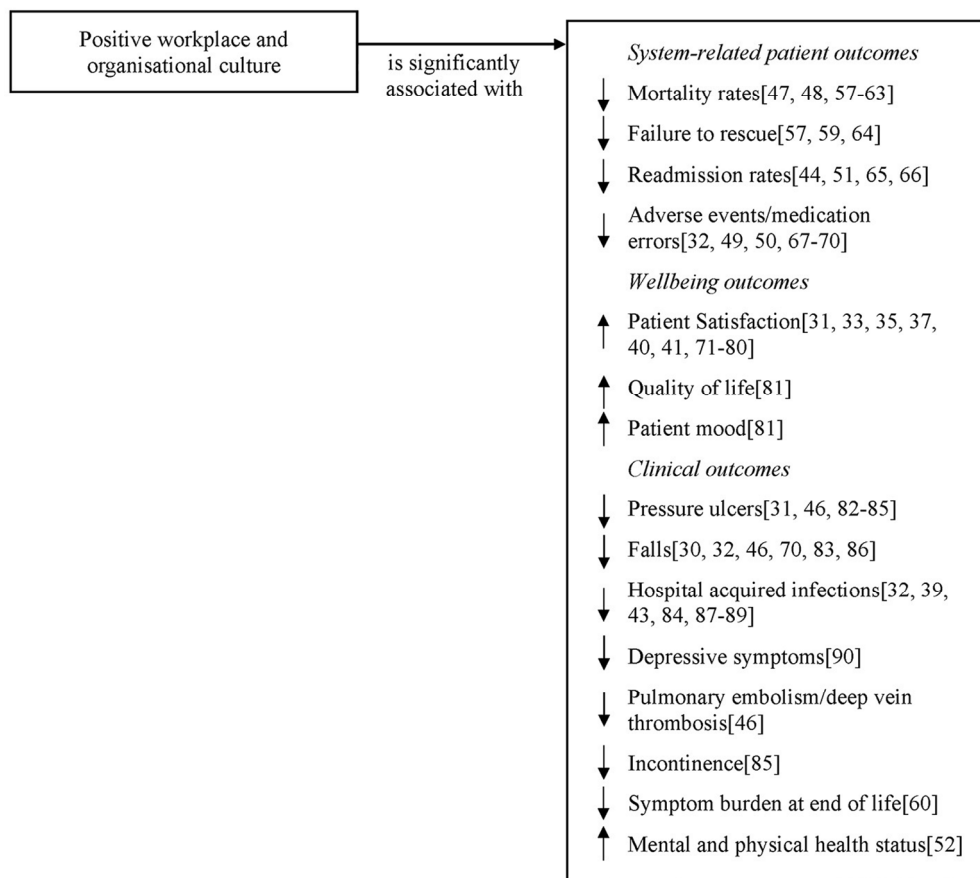

Key associations between culture and patient outcomes

122x108mm (300 x 300 DPI)

only

1  
2  
3 **Supplementary file A. Published Protocol**

4 See separate PDF attached  
5  
6  
7  
8  
9  
10  
11  
12  
13  
14  
15  
16  
17  
18  
19  
20  
21  
22  
23  
24  
25  
26  
27  
28  
29  
30  
31  
32  
33  
34  
35  
36  
37  
38  
39  
40  
41  
42  
43  
44  
45  
46  
47  
48  
49  
50  
51  
52  
53  
54  
55  
56  
57  
58  
59  
60

For peer review only

## Supplementary File B. Data Extraction Sheet

| Parameters           | Detail                                                                                                                                                                                       | Reviewer entry                                                                                                                                                                                                                                                          |
|----------------------|----------------------------------------------------------------------------------------------------------------------------------------------------------------------------------------------|-------------------------------------------------------------------------------------------------------------------------------------------------------------------------------------------------------------------------------------------------------------------------|
| Endnote ref #        |                                                                                                                                                                                              |                                                                                                                                                                                                                                                                         |
| Reference            | <i>Authors, year, article title, journal name, vol, issue, page numbers (use Harvard Ref Style)</i>                                                                                          |                                                                                                                                                                                                                                                                         |
| Location             | <i>Country</i>                                                                                                                                                                               |                                                                                                                                                                                                                                                                         |
| Language             | <i>English only</i>                                                                                                                                                                          |                                                                                                                                                                                                                                                                         |
| Time frame           | <i>Period of data collection</i>                                                                                                                                                             |                                                                                                                                                                                                                                                                         |
| Study type           | <i>e.g., qualitative, mixed methods, intervention study</i>                                                                                                                                  |                                                                                                                                                                                                                                                                         |
| Study primary aim    | <i>e.g., test performance of organisations with different cultures; test an intervention</i>                                                                                                 |                                                                                                                                                                                                                                                                         |
| Study secondary aims | <i>e.g., identify factors associated with organisational culture</i>                                                                                                                         |                                                                                                                                                                                                                                                                         |
| Exclude?             | <i>Circle include or exclude, + reason if excluded</i>                                                                                                                                       | <ol style="list-style-type: none"> <li>1. Other languages</li> <li>2. Not peer reviewed literature</li> <li>3. Not healthcare setting</li> <li>4. Not primary empirical research</li> <li>5. Does not include organisational culture and/or patient outcomes</li> </ol> |
| Data                 | <i>Total N of organisation participants (e.g. three hospitals)</i>                                                                                                                           |                                                                                                                                                                                                                                                                         |
|                      | <i>Type of organisation participant (e.g. teaching hospital)</i>                                                                                                                             |                                                                                                                                                                                                                                                                         |
|                      | <i>Data types and sources used to performance and/or outcomes</i>                                                                                                                            |                                                                                                                                                                                                                                                                         |
|                      | <i>Methodological/statistical approach to identifying performance and/or outcomes</i>                                                                                                        |                                                                                                                                                                                                                                                                         |
| Methods              | <i>Methods used to study organisational or workplace culture or climate, and patient outcomes—summarise content of tools (e.g., interview questions/topics, surveys) used where possible</i> |                                                                                                                                                                                                                                                                         |

|                     |                                                                                                                                                        |  |
|---------------------|--------------------------------------------------------------------------------------------------------------------------------------------------------|--|
|                     | <i>Participants (e.g., nurses)</i>                                                                                                                     |  |
|                     | <i>Data analysis methods (e.g., statistical or quantitative method)</i>                                                                                |  |
| <b>Findings</b>     | <i>Quantitative results</i>                                                                                                                            |  |
|                     | <i>Qualitative results/ contextual factors most important for explaining relationship between culture and patient outcomes. Include example quotes</i> |  |
| <b>Implications</b> | <i>Recommendations for healthcare made based on the findings</i>                                                                                       |  |

*Note.* Table adapted from Taylor N, Clay-Williams R, Hogden E, Braithwaite J, Groene O. High performing hospitals: a qualitative systematic review of associated factors and practical strategies for improvement. *BMC Health Serv Res.* 2015;15(1):244.

## Supplementary File C. Risk of Bias Template

| Type of Bias            | Description                                                                                    | Example in Intervention Studies                                                                                                                                                                                  | Example of an Equivalent Scenario in Included Studies                                                                                |
|-------------------------|------------------------------------------------------------------------------------------------|------------------------------------------------------------------------------------------------------------------------------------------------------------------------------------------------------------------|--------------------------------------------------------------------------------------------------------------------------------------|
| <b>Selection bias</b>   | The bias that occurs when groups are not randomised and thus comparisons cannot be made        | Systematic differences in baseline characteristics between the groups, leading to biases when comparing results after an intervention; randomised groups being used                                              | That the context of the study was a convenience or purposive sample, or was not the most appropriate context for the study           |
| <b>Performance bias</b> | When study participants or researchers have knowledge of the study or its aims                 | Systematic differences in the care provided between the groups, or exposure to other confounding variables that influence results; can be minimised through double blinding (and reporting on its effectiveness) | Performance of the nurses or health professionals altering due to knowledge that patient outcomes are being measured                 |
| <b>Detection bias</b>   | Systematic differences in results due to the assessor's knowledge of study or group allocation | Differences in how outcomes are determined between groups; can be prevented through blinding of researchers                                                                                                      | Researchers interpreting the results have knowledge of the aims and hypotheses of the study, and the results are altered accordingly |
| <b>Attrition bias</b>   | The incompleteness of data due to participants withdrawing from the study                      | Systematic differences in withdrawals of groups from studies, leading to incomplete outcome data                                                                                                                 | The rate of non-participation e.g., in survey responses, the dropout rates between nurses and doctors                                |
| <b>Reporting bias</b>   | Selective reporting of outcomes                                                                | Difference in the probability of reporting significant versus insignificant findings                                                                                                                             | Significant findings more likely to be published than less important results                                                         |
| <b>Other bias</b>       | Any other important concerns regarding the study                                               | Biases that are found in a particular study setting                                                                                                                                                              | Bias due to issues not otherwise outlined here                                                                                       |

*Note.* Table descriptions derived from Higgins J, Altman D, Sterne J. Chapter 8. Assessing risk of bias in included studies. In: Higgins J, Green S, eds. *Cochrane Handbook for Systematic Reviews of Interventions Version 5.1.0*: The Cochrane Collaboration; 2011. Examples are the authors', based on included studies.

## Supplementary File D. Summary of Included Articles

| Study              | Study objective(s)                                                                                                                            | Study design                        | Measures                                                                                                                                                                                                                                                                                                                                                          | Participants; Duration                                                                 | Context; Setting   | Key findings                                                                                                                                                                                                                                                                                                      | Quality rating |
|--------------------|-----------------------------------------------------------------------------------------------------------------------------------------------|-------------------------------------|-------------------------------------------------------------------------------------------------------------------------------------------------------------------------------------------------------------------------------------------------------------------------------------------------------------------------------------------------------------------|----------------------------------------------------------------------------------------|--------------------|-------------------------------------------------------------------------------------------------------------------------------------------------------------------------------------------------------------------------------------------------------------------------------------------------------------------|----------------|
| Aiken et al., 2008 | Analyse the net effects of nurse practice environments on nurse and patient outcomes after accounting for nurse staffing and education        | Quantitative, cross-sectional study | <p><b>Work environment:</b><br/>Practice Environment Scale of the Nursing Work Index (PES-NWI); six survey measures assessing job satisfaction, burnout, and intent to leave job within the next year; three questions assessing nurses' perceptions of quality of care</p> <p><b>Patient outcome(s):</b> 30-day mortality rates from discharge abstract data</p> | <p>232,342 patients; 10,184 nurses</p> <p>Data collected April 1998- November 1999</p> | 168 hospitals; USA | <p>Care environment, along with nurses' education levels and nurse staffing, contributed to failure to rescue and mortality rates. Poorer environment had higher rates of mortality and failure-to-rescue</p> <p>Surgical mortality rates were more than 60% higher in hospitals with a poor work environment</p> | High           |
| Aiken et al., 2011 | Determine the conditions under which the impact of hospital nurse staffing, nurse education, and work environment are associated with patient | Quantitative, cross-sectional study | <p><b>Work environment:</b><br/>Practice Environment Scale of the Nursing Work Index (PES-NWI)</p> <p><b>Patient outcome(s):</b><br/>Patient deaths within 30 days of hospital admission and failure to rescue from the American Hospital Association (AHA) Annual</p>                                                                                            | <p>1,262,120 patients, 39,038 nurses</p> <p>Data collected 2005-2006</p>               | 665 hospitals; USA | Lowering the patient-to-nurse ratios significantly improved patient outcomes in hospitals with good work environments, somewhat improved patient outcomes in hospitals with average work environments, and had no effect on patient                                                                               | Medium         |



| Study                 | Study objective(s)                                                                                                                                                | Study design                        | Measures                                                                                                                                                                                                                                                                                              | Participants; Duration                                            | Context; Setting                       | Key findings                                                                                                                                                                                                                                                                                                                                                                            | Quality rating |
|-----------------------|-------------------------------------------------------------------------------------------------------------------------------------------------------------------|-------------------------------------|-------------------------------------------------------------------------------------------------------------------------------------------------------------------------------------------------------------------------------------------------------------------------------------------------------|-------------------------------------------------------------------|----------------------------------------|-----------------------------------------------------------------------------------------------------------------------------------------------------------------------------------------------------------------------------------------------------------------------------------------------------------------------------------------------------------------------------------------|----------------|
|                       | outcomes                                                                                                                                                          |                                     | Survey                                                                                                                                                                                                                                                                                                |                                                                   |                                        | outcomes in hospitals with poor work environments                                                                                                                                                                                                                                                                                                                                       |                |
| Aiken et al., 2013    | Determine the association between the use of agency-employed supplemental registered nurses (SRNs) to staff hospitals and patient mortality and failure to rescue | Quantitative, cross-sectional study | <b>Work environment:</b><br>Hospital use of SRNs; Practice Environment Scale of the Nursing Work Index (PES-NWI); nurse staffing metrics; nurse education metrics<br><br><b>Patient outcome(s):</b> 30-day inpatient mortality and failure to rescue obtained from annual patient discharge summaries | 40,356 registered nurses<br><br>Data collected 2005-2006          | 665 hospitals; USA                     | Before controlling for nurse and hospital characteristics, higher proportions of SRNs nurses in hospitals were associated with higher mortality and failure to rescue<br><br>This relationship became insignificant when work environments were taken into account<br><br>Hospitals with higher proportions of supplemental registered nurses had significantly worse work environments | Medium         |
| Ancarani et al., 2009 | Analyse the relation between different organisational                                                                                                             | Quantitative, cross-sectional study | <b>Organisation climate:</b><br>Interviews based on the Competing Value Framework                                                                                                                                                                                                                     | 1,018 patients; 625 medical staff (470 nurses and 155 physicians) | 47 wards across seven hospitals; Italy | An organisational model climate accentuating openness, change and innovation and a model emphasising cohesion                                                                                                                                                                                                                                                                           | High           |

| Study                 | Study objective(s)                                                                                                                                                                    | Study design                        | Measures                                                                                                                                                                                                                 | Participants; Duration                                                                   | Context; Setting                    | Key findings                                                                                                                                                                                                                                                                           | Quality rating |
|-----------------------|---------------------------------------------------------------------------------------------------------------------------------------------------------------------------------------|-------------------------------------|--------------------------------------------------------------------------------------------------------------------------------------------------------------------------------------------------------------------------|------------------------------------------------------------------------------------------|-------------------------------------|----------------------------------------------------------------------------------------------------------------------------------------------------------------------------------------------------------------------------------------------------------------------------------------|----------------|
|                       | climate models and patient satisfaction                                                                                                                                               |                                     | <b>Patient outcome(s):</b><br>Interviews based on SERVQUAL instrument, measuring consumer expectations and perceptions of a service                                                                                      | Data collected November 2007-May 2009                                                    |                                     | and workers' morale were positively related to patient satisfaction, whereas a model based on managerial control where negatively associated with patient satisfaction<br><br>Ward organisational climate significantly positively affected patient perceptions of the quality of care |                |
| Ancarani et al., 2011 | Test a model in which the ward manager's orientation towards a given organisational climate contributes to determine the climate perceived by medical and nursing staff. Test whether | Quantitative, cross-sectional study | <b>Organisational climate:</b><br>Organizational Climate Measure (OCM)<br><br><b>Patient outcome(s):</b><br>Questionnaire based on the SERVQUAL instrument, measuring consumer expectations and perceptions of a service | 57 managers; 621 nurses; 277 physicians; 1,598 patients.<br><br>Data collected 2007-2009 | 57 wards across 10 hospitals; Italy | Ward managers' Human Relations climate orientation is positively related to patient satisfaction                                                                                                                                                                                       | High           |

1  
2  
3  
4  
5  
6  
7  
8  
9  
10  
11  
12  
13  
14  
15  
16  
17  
18  
19  
20  
21  
22  
23  
24  
25  
26  
27  
28  
29  
30  
31  
32  
33  
34  
35  
36  
37  
38  
39  
40  
41  
42  
43  
44  
45  
46  
47  
48  
49

| Study                | Study objective(s)                                                                                                                                                | Study design                        | Measures                                                                                                                                                                                                                                                                                                                                                                                                                                                                                                                                                                     | Participants; Duration                                                                                                                                        | Context; Setting                           | Key findings                                                                                                                                                                            | Quality rating |
|----------------------|-------------------------------------------------------------------------------------------------------------------------------------------------------------------|-------------------------------------|------------------------------------------------------------------------------------------------------------------------------------------------------------------------------------------------------------------------------------------------------------------------------------------------------------------------------------------------------------------------------------------------------------------------------------------------------------------------------------------------------------------------------------------------------------------------------|---------------------------------------------------------------------------------------------------------------------------------------------------------------|--------------------------------------------|-----------------------------------------------------------------------------------------------------------------------------------------------------------------------------------------|----------------|
|                      | this, in turn, has an impact on patient satisfaction                                                                                                              |                                     |                                                                                                                                                                                                                                                                                                                                                                                                                                                                                                                                                                              |                                                                                                                                                               |                                            |                                                                                                                                                                                         |                |
| Ansmann et al., 2014 | Identify associations between hospital structures, physicians' social resources as well as job demands and control and patients perceived support from physicians | Quantitative, cross-sectional study | <p><b>Work environment:</b> Social capital measured by a six-item scale developed by Pfaff et al., 2004; Social support from colleagues measured using an adaptation of the original Caplan scales by Udris and Riemann; Job Content Questionnaire; Leadership survey measuring surgery volume and the number of hospitals constituting the breast cancer centre</p> <p><b>Patient outcome(s):</b> Three item questionnaire designed by authors assessing patients' perceptions of the support provided by physicians to help them cope with their illness and treatment</p> | <p>348 physicians; 108 leadership positions; 1,844 patients</p> <p>Physician survey November 2010-March 2011</p> <p>Leadership survey July-September 2010</p> | 35 breast cancer centre hospitals; Germany | Patients felt better supported by their physicians in hospitals with high social capital, a high percentage of permanently employed physicians, and less physically strained physicians | High           |
| Arnetz and           | Develop a                                                                                                                                                         | Quantitative,                       | <b>Work environment:</b>                                                                                                                                                                                                                                                                                                                                                                                                                                                                                                                                                     | 1,834 patients                                                                                                                                                | One hospital,                              | Perceived work                                                                                                                                                                          | Medium         |

| Study                    | Study objective(s)                                                                                                                                                                                                                          | Study design                        | Measures                                                                                                                                                                                                          | Participants; Duration                                                                                                       | Context; Setting                                                                                   | Key findings                                                                               | Quality rating |
|--------------------------|---------------------------------------------------------------------------------------------------------------------------------------------------------------------------------------------------------------------------------------------|-------------------------------------|-------------------------------------------------------------------------------------------------------------------------------------------------------------------------------------------------------------------|------------------------------------------------------------------------------------------------------------------------------|----------------------------------------------------------------------------------------------------|--------------------------------------------------------------------------------------------|----------------|
| Arnetz, 1996             | reliable and valid instrument, to determine the predictors of patients' ratings of quality and to measure patient satisfaction at two points in time to determine whether patient ratings change following a quality improvement initiative | interventional study                | <p>Questionnaire assessing patients' perceptions of quality of care and staff work environment</p> <p><b>Patient outcome(s):</b><br/>Questionnaire assessing overall patient satisfaction with pain treatment</p> | <p>(1994); 2,499 patients (1995); unspecified numbers of hospital staff</p> <p>Data collected August 1994- November 1995</p> | Sweden                                                                                             | environment was a significant predictor for a positive overall patient quality grade       |                |
| Ausserhofer et al., 2013 | Explore the relationship between patient safety climate and patient outcomes in                                                                                                                                                             | Quantitative, cross-sectional study | <p><b>Work environment:</b> Safety Organizing Scale; Practice Environment Scale of the Nursing Work Index (PES-NWI); Basel Extent of Rationing of Nursing Care (BERNCA-R);</p>                                    | <p>1,633 RNs; 997 patients</p> <p>Data collected October 2009- June 2010</p>                                                 | 132 surgical, medical and mixed surgical-medical units across 35 acute care hospitals; Switzerland | Patient safety climate was not found to be a significant predictor of patient satisfaction | High           |

| Study                     | Study objective(s)                                                                                                                             | Study design                     | Measures                                                                                                                                                                                                                                                          | Participants; Duration                                                                                                                                                                                                 | Context; Setting                                            | Key findings                                                                                                                                                                                                                                                                                            | Quality rating |
|---------------------------|------------------------------------------------------------------------------------------------------------------------------------------------|----------------------------------|-------------------------------------------------------------------------------------------------------------------------------------------------------------------------------------------------------------------------------------------------------------------|------------------------------------------------------------------------------------------------------------------------------------------------------------------------------------------------------------------------|-------------------------------------------------------------|---------------------------------------------------------------------------------------------------------------------------------------------------------------------------------------------------------------------------------------------------------------------------------------------------------|----------------|
|                           | Swiss acute care hospitals, adjusting for major organisational variables                                                                       |                                  | nurse staffing level and skill mix items from the RN4CAST study nurse questionnaire<br><br><b>Patient outcome(s):</b><br>Patient satisfaction item from the Hospital Consumer Assessment of Healthcare Providers and Systems                                      |                                                                                                                                                                                                                        |                                                             |                                                                                                                                                                                                                                                                                                         |                |
| Barsade and O'Neill, 2014 | Examine the influence of a culture of compassionate love, on outcomes for employees, residents in a long-term care setting, and their families | Quantitative, longitudinal study | <b>Organisational culture:</b><br>Culture of Companionate Love Scale<br><br><b>Patient outcome(s):</b><br>Questionnaires measuring mood, satisfaction and quality of life; medical database records of weight gain, emergency room transfers, and pressure ulcers | 185 employees (certified nursing assistants, nurses, social workers, physicians, food service workers, and employees and other employees); 108 residents; 42 family members of residents<br><br>Duration not specified | 13 units across three long-term care residential sites; USA | There was a significant positive association between companionate love culture, patient mood, quality of life, satisfaction, and fewer trips to the emergency room<br><br>There was no significant association between compassionate love culture and weight gain or lower incidence of pressure ulcers | Medium         |
| Benning et al., 2011      | Evaluation of the first phase                                                                                                                  | Mixed methods,                   | <b>Organisational culture:</b><br>Semi-structured interviews                                                                                                                                                                                                      | Interviews: 60 senior/strategic                                                                                                                                                                                        | Four hospitals participating in                             | There was a small improvement in staff                                                                                                                                                                                                                                                                  | High           |

| Study             | Study objective(s)                                                                                                                                                                                                                                         | Study design                        | Measures                                                                                                                                                                                                                                                    | Participants; Duration                                                                                                                                                                         | Context; Setting                                                                     | Key findings                                                                                                                                                                                                                                                                                                                                       | Quality rating |
|-------------------|------------------------------------------------------------------------------------------------------------------------------------------------------------------------------------------------------------------------------------------------------------|-------------------------------------|-------------------------------------------------------------------------------------------------------------------------------------------------------------------------------------------------------------------------------------------------------------|------------------------------------------------------------------------------------------------------------------------------------------------------------------------------------------------|--------------------------------------------------------------------------------------|----------------------------------------------------------------------------------------------------------------------------------------------------------------------------------------------------------------------------------------------------------------------------------------------------------------------------------------------------|----------------|
|                   | of the Health Foundation's Safer Patients Initiative (SPI): organisational intervention that focused on improving the reliability of specific frontline care processes in designated clinical specialties and promoting organisational and cultural change | interventional study                | investigating understanding of and enthusiasm for the SPI1; NHS Staff Survey<br><br><b>Patient outcome(s):</b> Errors and adverse events from case notes; mortality rates; patient satisfaction based on the National NHS Acute Inpatient Survey in England | staff; 47 ward staff<br><br>Survey: 3,397 staff in hospitals enrolled in the intervention; 15,300 staff in control hospitals<br><br>Case notes: 1,237 patients<br><br>Data collected 2005-2006 | the first phase of the SPI and 18 control hospitals; United Kingdom                  | attitudes to organisational climate in intervention hospitals<br><br>On a range of other measures and outcomes related to patient safety, there was no additive effect attributable to the SPI<br><br>Survey of patients showed no significant differences apart from an increase in perception of cleanliness in favour of intervention hospitals |                |
| Borg et al., 2015 | Establish the applicability of the Hofstede survey tool to measure and quantify organisational culture in healthcare                                                                                                                                       | Quantitative, cross-sectional study | <b>Organisational culture:</b> Hofstede Survey Tool<br><br><b>Patient outcome(s):</b> Methicillin resistant Staphylococcus aureus (MRSA) prevalence identified from blood cultures                                                                          | 135 doctors and nurses<br><br>Data collected July-August 2012                                                                                                                                  | Intensive care departments of seven tertiary care hospitals; four European countries | Hospitals with a history of consistently low prevalence of MRSA exhibited high scores for change facilitation and change readiness, together with perceptions of trust.                                                                                                                                                                            | Low            |

| Study              | Study objective(s)                                                                                                                                                                                                   | Study design                        | Measures                                                                                                                                                                                                                                                             | Participants; Duration                                                                                                 | Context; Setting                           | Key findings                                                                                                                               | Quality rating |
|--------------------|----------------------------------------------------------------------------------------------------------------------------------------------------------------------------------------------------------------------|-------------------------------------|----------------------------------------------------------------------------------------------------------------------------------------------------------------------------------------------------------------------------------------------------------------------|------------------------------------------------------------------------------------------------------------------------|--------------------------------------------|--------------------------------------------------------------------------------------------------------------------------------------------|----------------|
|                    | settings, and attempt to evaluate any associations between Infection Prevention and Control (IPC) outcomes and organisational culture scores                                                                         |                                     |                                                                                                                                                                                                                                                                      |                                                                                                                        |                                            | Hospitals with high prevalence of MRSA exhibited low scores for change readiness and change facilitation, but high scores for job security |                |
| Bosch et al., 2008 | Test the introduction of the diabetes passport and assess to what extent important aspects of restructured care such as multidisciplinary teamwork and different types of organisational culture are associated with | Quantitative, cross-sectional study | <p><b>Team climate:</b> Team Climate Inventory</p> <p><b>Organisational culture:</b> Competing Values Framework</p> <p><b>Patient outcome(s):</b> Measures of quality of diabetes care and clinical patient characteristics from medical records and self-report</p> | 752 patients with Diabetes mellitus type II; 83 Dutch health care professionals<br><br>Data collected during 2003-2004 | 30 primary care practices; The Netherlands | None of the selected clinical patient outcomes demonstrated significant associations with team climate or culture.                         | High           |

| Study                | Study objective(s)                                                                          | Study design                        | Measures                                                                                                                                                                                 | Participants; Duration                                                                                                        | Context; Setting               | Key findings                                                                                                                                                                                                                                                                                                                                      | Quality rating |
|----------------------|---------------------------------------------------------------------------------------------|-------------------------------------|------------------------------------------------------------------------------------------------------------------------------------------------------------------------------------------|-------------------------------------------------------------------------------------------------------------------------------|--------------------------------|---------------------------------------------------------------------------------------------------------------------------------------------------------------------------------------------------------------------------------------------------------------------------------------------------------------------------------------------------|----------------|
|                      | high quality diabetes care in small office-based general practices                          |                                     |                                                                                                                                                                                          |                                                                                                                               |                                |                                                                                                                                                                                                                                                                                                                                                   |                |
| Bradley et al., 2012 | Identify hospital strategies associated with lower RSMR (risk standardised mortality rates) | Quantitative, cross-sectional study | <p><b>Organisational environment:</b><br/>Questionnaire assessing the use of hospital strategies</p> <p><b>Patient outcome(s):</b> 30-day hospital RSMR based on hospital discharges</p> | <p>Unspecified number of patients hospitalised with acute myocardial infarction</p> <p>Data collected July 2005-June 2008</p> | 533 acute care hospitals; USA  | Key aspects of organisational environment (measured through hospital strategies) including effective communication and collaboration among groups, broad staff (cardiologist and pharmacist) presence and expertise, and a culture of creative problem solving and learning amongst cardiologists, were statistically associated with lower RSMRs | Medium         |
| Brewer, 2006         | Test the transtheoretical integration model (TIM) which proposes relationships              | Quantitative, cross-sectional study | <p><b>Organisational culture:</b><br/>Questionnaire measuring two hospital culture variables (group culture and developmental culture) through staff</p>                                 | 411 hospital employees (nurse and multi-disciplinary team members)                                                            | Four acute care hospitals; USA | A group-type culture (affiliation among all levels of hospital staff) was inversely related to patient falls with injury                                                                                                                                                                                                                          | High           |



1  
2  
3  
4  
5  
6  
7  
8  
9  
10  
11  
12  
13  
14  
15  
16  
17  
18  
19  
20  
21  
22  
23  
24  
25  
26  
27  
28  
29  
30  
31  
32  
33  
34  
35  
36  
37  
38  
39  
40  
41  
42  
43  
44  
45  
46  
47  
48  
49

| Study                | Study objective(s)                                                                                                                                                                                                              | Study design                        | Measures                                                                                                                                                                                                                                                                                 | Participants; Duration                                                                     | Context; Setting              | Key findings                                                                                                                                            | Quality rating |
|----------------------|---------------------------------------------------------------------------------------------------------------------------------------------------------------------------------------------------------------------------------|-------------------------------------|------------------------------------------------------------------------------------------------------------------------------------------------------------------------------------------------------------------------------------------------------------------------------------------|--------------------------------------------------------------------------------------------|-------------------------------|---------------------------------------------------------------------------------------------------------------------------------------------------------|----------------|
|                      | among team-based phenomena and patient safety and resource-use outcome variables. TIM consists of Work Group Design, Hospital Culture, Positive Intrateam Process, Negative Intrateam Process, and Organisational Effectiveness |                                     | members' perceptions of hospital culture, work group design, and positive and negative team processes<br><br><b>Patient outcome(s):</b><br>Administrative quality reports recording patient falls with injury; financial reports measuring patient care unit expenses and length of stay | Duration not specified                                                                     |                               | Developmental culture (innovation and risk taking) was positively related to patient falls with injury and total expenses per patient day               |                |
| Carthon et al., 2015 | Examine the relationship between missing nursing care and hospital readmissions                                                                                                                                                 | Quantitative, cross-sectional study | <b>Work environment:</b><br>Practice Environment Scale of the Nursing Work Index (PES-NWI)<br><br><b>Patient outcome(s):</b> All-cause readmission                                                                                                                                       | 20,605 bedside nurses; 160,930 patients with heart failure<br><br>Data collected 2005-2006 | 419 acute care hospitals; USA | Before adjusting for patient and hospital characteristics, patients were more likely to experience a readmission when nursing care activities were more | Medium         |

| Study                   | Study objective(s)                                                                                           | Study design                        | Measures                                                                                                                                                                                                                                 | Participants; Duration                                                   | Context; Setting                            | Key findings                                                                                                                                                                                                                   | Quality rating |
|-------------------------|--------------------------------------------------------------------------------------------------------------|-------------------------------------|------------------------------------------------------------------------------------------------------------------------------------------------------------------------------------------------------------------------------------------|--------------------------------------------------------------------------|---------------------------------------------|--------------------------------------------------------------------------------------------------------------------------------------------------------------------------------------------------------------------------------|----------------|
|                         |                                                                                                              |                                     | within 30 days of discharge from an index admission for heart failure                                                                                                                                                                    |                                                                          |                                             | frequently missed (exception: pain management and timely medication administration)<br><br>Once adjusting for work environment, the effects of missing essential nursing was no longer a significant predictor of readmissions |                |
| Cassie and Cassie, 2012 | Examine the effect of organisational culture and climate on depressive symptoms among nursing home residents | Quantitative, cross-sectional study | <b>Organisational culture:</b> Organizational Social Context Scale<br><br><b>Patient outcome(s):</b> Minimum Data Set (Depression Rating Scale (DRS); Cognitive Performance Scale (CPS); Activities of Daily Living - Long Form (ADL-L)) | 1,114 employees; 5,497 residents<br><br>Data collected Jan 2007-May 2008 | 23 nursing homes; USA                       | Depressive symptoms were associated with two dimensions of organisational culture (proficiency and resistance), and three dimensions of climate (stress, engagement, and functionality)                                        | High           |
| Chang and Mark, 2011    | Investigate whether learning climate moderates the relationship                                              | Quantitative, cross-sectional study | <b>Work environment:</b> Questionnaires assessing work dynamics and communication with physicians                                                                                                                                        | 2,744 patients; 4,954 nurses<br><br>Data collected 2003-2004             | 279 nursing units across 146 hospitals; USA | Significant negative relationship between learning climate and medication errors (the more positive the                                                                                                                        | Medium         |

1  
2  
3  
4  
5  
6  
7  
8  
9  
10  
11  
12  
13  
14  
15  
16  
17  
18  
19  
20  
21  
22  
23  
24  
25  
26  
27  
28  
29  
30  
31  
32  
33  
34  
35  
36  
37  
38  
39  
40  
41  
42  
43  
44  
45  
46  
47  
48  
49

| Study            | Study objective(s)                                                                | Study design                        | Measures                                                                                                                                  | Participants; Duration                                                          | Context; Setting                   | Key findings                                                                                                                                                                                                                                                                                                                                                                                      | Quality rating |
|------------------|-----------------------------------------------------------------------------------|-------------------------------------|-------------------------------------------------------------------------------------------------------------------------------------------|---------------------------------------------------------------------------------|------------------------------------|---------------------------------------------------------------------------------------------------------------------------------------------------------------------------------------------------------------------------------------------------------------------------------------------------------------------------------------------------------------------------------------------------|----------------|
|                  | between error producing conditions and medication errors                          |                                     | <p><b>Learning climate:</b> Error Orientation Scale</p> <p><b>Patient outcome(s):</b> Medication error obtained from incident reports</p> |                                                                                 |                                    | <p>learning environment was, the fewer medication errors occurred). However, there was no significant difference when the learning culture was average compared to when it was good</p> <p>Communication and experience were not associated with medication errors significantly</p> <p>Work dynamics was not significantly associated with medication errors, regardless of learning climate</p> |                |
| Cho et al., 2015 | Examine the effects of nurse staffing, work environment, and education on patient | Quantitative, cross-sectional study | <p><b>Work environment:</b> Practice Environment Scale of the Nursing Work Index (PES-NWI)</p> <p><b>Patient outcome(s):</b></p>          | <p>1,024 staff; 76,036 surgical patients</p> <p>Data was collected January-</p> | 14 teaching hospitals; South Korea | Patient mortality was nearly 48% lower in hospitals with better nurse work environments compared to hospitals with mixed or poor nurse                                                                                                                                                                                                                                                            |                |

| Study                  | Study objective(s)                                                                                                                              | Study design                           | Measures                                                                                                                                                                                                                                                | Participants; Duration                                                                                                                                                                                                                                                                       | Context; Setting              | Key findings                                                                                               | Quality rating |
|------------------------|-------------------------------------------------------------------------------------------------------------------------------------------------|----------------------------------------|---------------------------------------------------------------------------------------------------------------------------------------------------------------------------------------------------------------------------------------------------------|----------------------------------------------------------------------------------------------------------------------------------------------------------------------------------------------------------------------------------------------------------------------------------------------|-------------------------------|------------------------------------------------------------------------------------------------------------|----------------|
|                        | mortality                                                                                                                                       |                                        | Patient discharge data recording patient characteristics and 30-day mortality rates                                                                                                                                                                     | December 2008                                                                                                                                                                                                                                                                                |                               | work environments                                                                                          |                |
| Coustasse et al., 2008 | Analyse organisational culture in a community hospital in Texas to measure organisational culture change and its impact on patient satisfaction | Mixed methods, longitudinal case study | <p><b>Organisational culture:</b><br/>Two sets of open-ended semi-structured interviews assessing organisational culture</p> <p><b>Patient outcome(s):</b><br/>Patient satisfaction scores and percentiles from Inpatient and Outpatient care areas</p> | <p>Semi-structured interviews: 162 Hospital staff</p> <p>Culture interview: 29 members of the executive team</p> <p>Surveys: 600 staff employees</p> <p>Field experiment data collected January 2003-December 2003</p> <p>Patient satisfaction data collected January 1998-December 2003</p> | One community hospital; USA   | The shared vision of one subculture within the hospital was associated with increased patient satisfaction | Medium         |
| Davenport et al., 2007 | Measure the impact of                                                                                                                           | Quantitative, cross-                   | <b>Organisational climate:</b><br>Safety Attitudes                                                                                                                                                                                                      | 6,083 attending and resident                                                                                                                                                                                                                                                                 | 44 Veterans Affairs and eight | The OCSF measures of teamwork climate, safety                                                              | High           |

| Study                   | Study objective(s)                                                                                        | Study design                        | Measures                                                                                                                                                                                                                                                                    | Participants; Duration                                                                                                                            | Context; Setting              | Key findings                                                                                                                                                                                                                                                                                              | Quality rating |
|-------------------------|-----------------------------------------------------------------------------------------------------------|-------------------------------------|-----------------------------------------------------------------------------------------------------------------------------------------------------------------------------------------------------------------------------------------------------------------------------|---------------------------------------------------------------------------------------------------------------------------------------------------|-------------------------------|-----------------------------------------------------------------------------------------------------------------------------------------------------------------------------------------------------------------------------------------------------------------------------------------------------------|----------------|
|                         | organisational climate safety factors (OCSFs) on risk-adjusted surgical morbidity and mortality           | sectional survey                    | Questionnaire (SAQ)<br><br><b>Patient outcome(s):</b> Risk-adjusted morbidity and mortality outcomes derived using the National Surgical Quality Improvement Program (NSQIP) dataset and models                                                                             | doctors, nurses, and other providers<br><br>Models derived from data on more than 100,000 patients<br><br>Data collected July 2003-September 2004 | academic medical centres; USA | climate, working conditions, recognition of stress effects, job satisfaction, and burnout were not correlated with risk-adjusted morbidity and mortality<br><br>Reported levels of positive communication/collaboration with attending and resident doctors correlated with lower risk-adjusted morbidity |                |
| Dubois C-A et al., 2013 | Examine the associations of four distinct nursing care organisational models with patient safety outcomes | Quantitative, cross sectional study | <b>Organisational culture:</b> Four category variable representing nursing care organisational models<br><br><b>Patient outcome(s):</b> Patient records reporting medication errors, falls, pneumonia, urinary tract infections, unjustified restraints and pressure ulcers | 2,699 patients<br><br>Data collected in a 30-day period, undocumented timeframe                                                                   | 11 hospitals; Canada          | After controlling for patient characteristics, patient risk of experiencing one or more events and of experience an event with consequences was significantly lower in the innovative professional and basic models compared to the adaptive functional and basic functional models                       | High           |

| Study                 | Study objective(s)                                                                                                                                                            | Study design                                                    | Measures                                                                                                                                                                                                                                                                                                                | Participants; Duration                                                                                                                                                                              | Context; Setting                                                                                                                                                 | Key findings                                                                                                                                                                                                                                                                                                | Quality rating |
|-----------------------|-------------------------------------------------------------------------------------------------------------------------------------------------------------------------------|-----------------------------------------------------------------|-------------------------------------------------------------------------------------------------------------------------------------------------------------------------------------------------------------------------------------------------------------------------------------------------------------------------|-----------------------------------------------------------------------------------------------------------------------------------------------------------------------------------------------------|------------------------------------------------------------------------------------------------------------------------------------------------------------------|-------------------------------------------------------------------------------------------------------------------------------------------------------------------------------------------------------------------------------------------------------------------------------------------------------------|----------------|
|                       |                                                                                                                                                                               |                                                                 |                                                                                                                                                                                                                                                                                                                         |                                                                                                                                                                                                     |                                                                                                                                                                  | The lowest rates of negative outcomes were seen in the innovative professional model, characterised by richer staff skill mix, higher staffing intensity, and an environment with greater support of professional practice and investments in innovation                                                    |                |
| Duffield et al., 2011 | What are the relationships among patient outcomes (OPSN (Outcomes Potentially Sensitive to Nursing) [consisting of 11 patient outcomes], falls, and medication errors), nurse | Quantitative, longitudinal and concurrent cross-sectional study | <p><b>Work environment:</b> The Area Health Services database; NWI-R; Nurse questionnaire measuring perceptions about the work environment and quality of care on the unit; Environmental Complexity Scale</p> <p><b>Patient outcome(s):</b> The Health Information Exchange (HIE) database; patient discharge data</p> | <p>Longitudinal study: 10,132,246 (4,964,924 matched to wards) ward stay records, 10,963,806 (2,675,428 matched to wards) nurse roster and payroll records</p> <p>Data collected from 2000-2006</p> | <p>Longitudinal study: Patient data from 80 hospitals; nursing staff data from 27 hospitals; Australia</p> <p>Cross-sectional study: 19 hospitals; Australia</p> | <p>Increased medication errors were associated with more nurses experiencing a threat of violence and tasks delayed</p> <p>Time-based medication errors were associated with perceptions of physical violence, emotional abuse, the amount of additional time needed for patient care per shift, higher</p> | Medium         |

1  
2  
3  
4  
5  
6  
7  
8  
9  
10  
11  
12  
13  
14  
15  
16  
17  
18  
19  
20  
21  
22  
23  
24  
25  
26  
27  
28  
29  
30  
31  
32  
33  
34  
35  
36  
37  
38  
39  
40  
41  
42  
43  
44  
45  
46  
47  
48  
49

| Study                   | Study objective(s)                                                                                                                                                                                                         | Study design                        | Measures                                                                                                                                                                                                                                                                                                                                                        | Participants; Duration                                                                                                                 | Context; Setting                | Key findings                                                                                                                                                                             | Quality rating |
|-------------------------|----------------------------------------------------------------------------------------------------------------------------------------------------------------------------------------------------------------------------|-------------------------------------|-----------------------------------------------------------------------------------------------------------------------------------------------------------------------------------------------------------------------------------------------------------------------------------------------------------------------------------------------------------------|----------------------------------------------------------------------------------------------------------------------------------------|---------------------------------|------------------------------------------------------------------------------------------------------------------------------------------------------------------------------------------|----------------|
|                         | skill mix, nursing workload, and the nursing work environment                                                                                                                                                              |                                     |                                                                                                                                                                                                                                                                                                                                                                 | <p>Cross-sectional study:<br/>5,885 patient records, 22,497 patient-days, 13,442 nurse shifts</p> <p>Data collected from 2004-2005</p> |                                 | turnover of patients, and the proportion of patients waiting for a care facility                                                                                                         |                |
| Estabrooks et al., 2011 | Assess the relative effects and importance of nursing education and skill mix, continuity of care, and quality of the work environment on 30-day mortality rate of patients (after adjusting for institutional factors and | Quantitative, cross-sectional study | <p><b>Work environment:</b><br/>Questionnaire assessing nursing skill mix, use of casual and temporary nurses, quality of care, job satisfaction, and educational preparation</p> <p><b>Patient outcome(s):</b><br/>Discharge abstracts reporting patient information (age, sex, vital status at discharge, and comorbid conditions, and primary diagnosis)</p> | <p>18,142 patients; 6,526 nurses</p> <p>Data collected April 1998-March 1999</p>                                                       | 49 acute care hospitals; Canada | Factors associated with a lower patient mortality rate included high nurse education levels, richer skill mix, better nurse-physician relationship, less casual and temporary employment | High           |

| Study                   | Study objective(s)                                                                                                                                                                | Study design                     | Measures                                                                                                                                                                 | Participants; Duration                                                                                                                                                                              | Context; Setting                                                       | Key findings                                                                                                                                                                                                                                                                                                                                                                                                                                                                                       | Quality rating |
|-------------------------|-----------------------------------------------------------------------------------------------------------------------------------------------------------------------------------|----------------------------------|--------------------------------------------------------------------------------------------------------------------------------------------------------------------------|-----------------------------------------------------------------------------------------------------------------------------------------------------------------------------------------------------|------------------------------------------------------------------------|----------------------------------------------------------------------------------------------------------------------------------------------------------------------------------------------------------------------------------------------------------------------------------------------------------------------------------------------------------------------------------------------------------------------------------------------------------------------------------------------------|----------------|
|                         | patient characteristics)                                                                                                                                                          |                                  |                                                                                                                                                                          |                                                                                                                                                                                                     |                                                                        |                                                                                                                                                                                                                                                                                                                                                                                                                                                                                                    |                |
| Estabrooks et al., 2015 | Examine the influence of organisational context on symptom burden and to compare symptom burden in the last year of life between nursing home residents with and without dementia | Quantitative, longitudinal study | <b>Organisational environment:</b> In-person interviews using the Alberta Content Tool<br><br><b>Patient outcome(s):</b> Resident Assessment Instrument-Minimum Data Set | 3,647 residents (2,635 with dementia and 1,012 without); 1381 front-line care<br><br>Organisational environment data collected July 2009-June 2010<br><br>Patient outcomes data collected 2008-2012 | 36 nursing homes (including both high and low care facilities); Canada | Symptom burden at end of life differs between low- and high-context facilities<br><br>Residents of high-context facilities had longer average length of stay, more unstable health and aggressive and challenging behaviour, and higher prevalence of dementia and delirium, compared to low-context facilities<br><br>The prevalence of dyspnea, pain, urinary tract infections, cancer diagnosis and use of antipsychotics without a diagnosis of psychosis was lower in high-context facilities | High           |
| Fan et al., 2016        | Evaluate the association                                                                                                                                                          | Quantitative, cross-             | <b>Safety culture:</b> Hospital Survey on Patient Safety                                                                                                                 | 1,926 personnel from surgical                                                                                                                                                                       | Seven hospitals; USA                                                   | Ten of the 12 safety culture dimensions were                                                                                                                                                                                                                                                                                                                                                                                                                                                       | Medium         |



1  
2  
3  
4  
5  
6  
7  
8  
9  
10  
11  
12  
13  
14  
15  
16  
17  
18  
19  
20  
21  
22  
23  
24  
25  
26  
27  
28  
29  
30  
31  
32  
33  
34  
35  
36  
37  
38  
39  
40  
41  
42  
43  
44  
45  
46  
47  
48  
49

| Study                   | Study objective(s)                                                                                                  | Study design                        | Measures                                                                                                                                                                                                  | Participants; Duration                                                                                                                    | Context; Setting                                                              | Key findings                                                                                                                                                                                                                                                                                                                                                                | Quality rating |
|-------------------------|---------------------------------------------------------------------------------------------------------------------|-------------------------------------|-----------------------------------------------------------------------------------------------------------------------------------------------------------------------------------------------------------|-------------------------------------------------------------------------------------------------------------------------------------------|-------------------------------------------------------------------------------|-----------------------------------------------------------------------------------------------------------------------------------------------------------------------------------------------------------------------------------------------------------------------------------------------------------------------------------------------------------------------------|----------------|
|                         | between safety culture and surgical site infection (SSI)                                                            | sectional study                     | Culture (HSOPS)<br><br><b>Patient outcome(s):</b><br>Postoperative colon surgery SSI data reported by hospitals                                                                                           | units<br><br>Safety culture data collected November 2012-December 2013<br><br>SSI data collected January-December 2013                    |                                                                               | associated with colon SSI rate (perceptions of patient safety, teamwork across units, organisational learning, feedback and communication about error, management support for patient safety, teamwork within units, communication openness, supervisor/manager expectations and actions promoting safety, non-punitive response to error and frequency of events reported) |                |
| Fedorowsky et al., 2015 | Assess the association between organisational culture and health care workers' attitudes, knowledge, practices, and | Quantitative, cross-sectional study | <b>Organisational culture:</b> Questionnaire assessing staff engagement, overwhelmed/stress-chaos, hospital leadership, health care workers' knowledge, attitudes, and practices regarding CRE prevention | 268 health care workers (registered/academic nurses, practical nurses/auxiliary staff, physicians, and paramedical staff, e.g., radiology | One Post-acute care facility (PACF) and one acute care hospital (ACH); Israel | The organisational culture factor known as staff engagement was negatively correlated with CRE acquisition rate<br><br>Overwhelmed/stress-chaos was positively correlated with CRE acquisitions                                                                                                                                                                             | Medium         |

| Study                | Study objective(s)                                                                                                                                                 | Study design                        | Measures                                                                                                                                                                                                    | Participants; Duration                                                                                                                                                                     | Context; Setting            | Key findings                                                                                                                                                                                                                               | Quality rating |
|----------------------|--------------------------------------------------------------------------------------------------------------------------------------------------------------------|-------------------------------------|-------------------------------------------------------------------------------------------------------------------------------------------------------------------------------------------------------------|--------------------------------------------------------------------------------------------------------------------------------------------------------------------------------------------|-----------------------------|--------------------------------------------------------------------------------------------------------------------------------------------------------------------------------------------------------------------------------------------|----------------|
|                      | CRE (Carbapenem-Resistant Enterobacteriaceae) acquisition rates                                                                                                    |                                     | <b>Patient outcome(s):</b> CRE acquisition rates from the Israeli National Infection Prevention Center                                                                                                      | technicians and physiotherapists<br><br>Organisational culture questionnaire distributed in January-February 2013<br><br>CRE acquisition rates obtained from January-December 2013 records |                             | Hospital leadership showed no significant correlation with CRE acquisition in either contexts                                                                                                                                              |                |
| Gardner et al., 2007 | Examine the relationships between staff nurses' perceptions of dialysis work environments, nurses' intentions to leave their current jobs, nurse turnover, patient | Quantitative, cross-sectional study | <b>Work environment:</b> Practice Environment Scale of the Nursing Work Index (PES-NWI)<br><br><b>Patient outcome(s):</b> Dialysis facility patient satisfaction survey; Number of patient hospitalisations | 199 nurses<br><br>Duration not specified                                                                                                                                                   | 56 dialysis facilities; USA | Negative overall ratings of the dialysis work environment were significantly related to hospitalisations for patients on dialysis greater than 90 days<br><br>PES-NWI scores were not significantly related to patient satisfaction scores | High           |

| Study                          | Study objective(s)                                                                                                                          | Study design                       | Measures                                                                                                                                                                                                                                                                                                      | Participants; Duration                                                                        | Context; Setting                      | Key findings                                                                                                                                                                                                                                                                                                                                                                                                                         | Quality rating |
|--------------------------------|---------------------------------------------------------------------------------------------------------------------------------------------|------------------------------------|---------------------------------------------------------------------------------------------------------------------------------------------------------------------------------------------------------------------------------------------------------------------------------------------------------------|-----------------------------------------------------------------------------------------------|---------------------------------------|--------------------------------------------------------------------------------------------------------------------------------------------------------------------------------------------------------------------------------------------------------------------------------------------------------------------------------------------------------------------------------------------------------------------------------------|----------------|
|                                | satisfaction, and patient hospitalisation rates                                                                                             |                                    |                                                                                                                                                                                                                                                                                                               |                                                                                               |                                       |                                                                                                                                                                                                                                                                                                                                                                                                                                      |                |
| Greenslade and Jimmieson, 2011 | Test the model that service climate would increase the effort and performance of nursing groups and, in turn, increase patient satisfaction | Qualitative, cross-sectional study | <p><b>Organisational climate:</b> Global Service Climate Scale; questionnaire measuring the effort exerted on specific tasks and effort intensity for contextual performance; Technical Care Scale; Job-Task Support Scale</p> <p><b>Patient outcome(s):</b> Questionnaire assessing patient satisfaction</p> | <p>156 nurses; 39 nurse unit managers (NUMs); 171 patients</p> <p>Data collected May 2007</p> | Two hospitals; Australia              | <p>Patient satisfaction was positively associated with nurses' perception that there was a positive service climate</p> <p>Perceptions of service climate were associated with task and contextual effort, suggesting that a positive climate motivates nurses to provide quality patient care. Nurses felt that they exerted more effort towards providing technical care than towards performing extra-role tasks for patients</p> | High           |
| Hallowell et al., 2016         | Examine the association of the neonatal intensive care                                                                                      | Quantitative, longitudinal study   | <b>Work environment:</b> Practice Environment Scale of the Nursing Work Index (PES-NWI); nursing metrics                                                                                                                                                                                                      | 5,614 nurses; 6,997 patients (very low weight birth infants)                                  | 97 neonatal intensive care units; USA | Better nurse work environments and better educated nurses in US NICUs were associated                                                                                                                                                                                                                                                                                                                                                | High           |

| Study               | Study objective(s)                                                                                                                                                                                                               | Study design                        | Measures                                                                                                                                                                                                                       | Participants; Duration                                                                                                                           | Context; Setting             | Key findings                                                                                                                                                                                                                           | Quality rating |
|---------------------|----------------------------------------------------------------------------------------------------------------------------------------------------------------------------------------------------------------------------------|-------------------------------------|--------------------------------------------------------------------------------------------------------------------------------------------------------------------------------------------------------------------------------|--------------------------------------------------------------------------------------------------------------------------------------------------|------------------------------|----------------------------------------------------------------------------------------------------------------------------------------------------------------------------------------------------------------------------------------|----------------|
|                     | unit (NICU) work environment, staffing levels, level of nurse education, lactation consultant availability, and nurse-reported breastfeeding support with very low birth weight (VLBW) infant receipt of human milk at discharge |                                     | e.g., staffing, education, and experience<br><br><b>Patient outcome(s):</b> Rate of very low birth weight infants discharged on “any human milk” from hospitalisation records                                                  | Data collected 2008                                                                                                                              |                              | with a higher provision of human milk for VLBW infants<br><br>In NICUs where more infants receive breastfeeding support from nurses, more VLBW infants received human milk at the point of discharge to home                           |                |
| Hansen et al., 2011 | Define the relationship between hospital safety climate and readmission rates within 30 days following discharge                                                                                                                 | Quantitative, cross-sectional study | <b>Organisational culture:</b> Patient Safety Climate in Healthcare Organizations (PSCHO)<br><br><b>Patient outcome(s):</b> Risk-standardised hospital readmission rates from Centers for Medicare and Medicaid Services (CMS) | 36,375 employees (frontline staff, nurses, physicians and senior managers)<br><br>Survey data collected July 2006-May 2007<br><br>Admission rate | 67 acute care hospitals; USA | There was a significant positive association between lower safety climate and higher readmission rates for acute myocardial infarction (AMI) and heart failure (HF), but not pneumonia. Perceptions of frontline staff associated with | High           |

| Study              | Study objective(s)                                                                                                                                                                                                        | Study design                        | Measures                                                                                                                                                                                                                                                                                          | Participants; Duration                                                                                    | Context; Setting                    | Key findings                                                                                                                                                                                                              | Quality rating |
|--------------------|---------------------------------------------------------------------------------------------------------------------------------------------------------------------------------------------------------------------------|-------------------------------------|---------------------------------------------------------------------------------------------------------------------------------------------------------------------------------------------------------------------------------------------------------------------------------------------------|-----------------------------------------------------------------------------------------------------------|-------------------------------------|---------------------------------------------------------------------------------------------------------------------------------------------------------------------------------------------------------------------------|----------------|
|                    |                                                                                                                                                                                                                           |                                     |                                                                                                                                                                                                                                                                                                   | data collected 2008                                                                                       |                                     | readmission rates but not those of senior management<br><br>Physician and nurse perceptions of safety climate were associated with AMI and HF readmission rates, respectively, but senior management perceptions were not |                |
| Kelly et al., 2014 | Determine the extent to which variation in ICU nursing characteristics—staffing, work environment, education, and experience—is associated with mortality. A secondary result of this would be illuminating strategies to | Quantitative, cross-sectional study | <b>Organisational environment:</b> Two databases: University of Pennsylvania Multi-State Nursing Care and Patient Safety Study and the American Hospital Association (AHA) Annual Survey<br><br>Critical care nurses' reports; the Practice Environment Scale of the Nursing Work Index (PES-NWI) | 55,159 older adults on mechanical ventilation; 3,193 critical care nurses<br><br>Data collected 2006-2008 | 303 adult acute care hospitals; USA | Patients in critical care units with better nurse work environments experienced lower odds of 30-day mortality than those in worse nurse work environments                                                                | High           |

| Study                   | Study objective(s)                                                                                                                                                          | Study design                        | Measures                                                                                                                                                            | Participants; Duration                                                         | Context; Setting                                             | Key findings                                                                                                                                                                                                                                                                                                | Quality rating |
|-------------------------|-----------------------------------------------------------------------------------------------------------------------------------------------------------------------------|-------------------------------------|---------------------------------------------------------------------------------------------------------------------------------------------------------------------|--------------------------------------------------------------------------------|--------------------------------------------------------------|-------------------------------------------------------------------------------------------------------------------------------------------------------------------------------------------------------------------------------------------------------------------------------------------------------------|----------------|
|                         | improve patient outcomes                                                                                                                                                    |                                     | <b>Patient outcome(s):</b> The Medicare Provider Analysis and Review (MedPAR) database reporting 30-day mortality                                                   |                                                                                |                                                              |                                                                                                                                                                                                                                                                                                             |                |
| Kutney-Lee et al., 2009 | Examine the contribution of nurses' work environments to patient satisfaction using national Hospital Consumer Assessment of Healthcare Providers and Systems (HCAHPS) data | Quantitative, cross-sectional study | <b>Work environment:</b> Practice Environment Scale of the Nursing Work Index (PES-NWI)<br><br><b>Patient outcome(s):</b> HCAHPS                                    | 20,984 resident nurses<br><br>Data collected 2006-2009                         | 430 acute care hospitals; USA                                | The nurse work environment was significantly related to all HCAHPS patient satisfaction measures<br><br>Patient-to-nurse workloads were significantly associated with patients' ratings and recommendation of the hospital to others, and with their satisfaction with the receipt of discharge information | Medium         |
| Kutney-Lee et al., 2015 | Compare changes over time in surgical patient outcomes, nurse-reported quality, and nurse outcomes                                                                          | Quantitative, longitudinal study    | <b>Work environment:</b> A binary variable measuring Magnetic status; Pennsylvania Registered Nurse Survey; Multi-State Nursing Care and Patient Safety Survey; The | 20,984 staff nurses; unspecified number of patients<br><br>Data collected 2007 | 136 hospitals (11 emerging Magnets and 125 non-Magnets); USA | Emerging Magnet hospitals demonstrated markedly greater improvements over time on the PES-NWI overall score and all five subscales compared to hospitals                                                                                                                                                    | Medium         |

1  
2  
3  
4  
5  
6  
7  
8  
9  
10  
11  
12  
13  
14  
15  
16  
17  
18  
19  
20  
21  
22  
23  
24  
25  
26  
27  
28  
29  
30  
31  
32  
33  
34  
35  
36  
37  
38  
39  
40  
41  
42  
43  
44  
45  
46  
47  
48  
49

| Study               | Study objective(s)                                                                                                                       | Study design                       | Measures                                                                                                                                                                                                                                                                                                                                           | Participants; Duration                                                                                                               | Context; Setting                                                         | Key findings                                                                                                                                                                                                                                                                    | Quality rating |
|---------------------|------------------------------------------------------------------------------------------------------------------------------------------|------------------------------------|----------------------------------------------------------------------------------------------------------------------------------------------------------------------------------------------------------------------------------------------------------------------------------------------------------------------------------------------------|--------------------------------------------------------------------------------------------------------------------------------------|--------------------------------------------------------------------------|---------------------------------------------------------------------------------------------------------------------------------------------------------------------------------------------------------------------------------------------------------------------------------|----------------|
|                     | in a sample of hospitals that attained Magnet recognition between 1999 and 2007 with hospitals that remained non-Magnet                  |                                    | <p>American Hospital Association (AHA) Annual Survey; Practice Environment Scale of the Nursing Work Index (PES-NWI)</p> <p><b>Patient outcome(s):</b> Pennsylvania Health Care Cost Containment Council (PHC4) administrative discharge abstract files and death record files measuring 30-day surgical mortality and failure-to-rescue (FTR)</p> |                                                                                                                                      |                                                                          | <p>that remained non-Magnet</p> <p>Emerging Magnet hospitals experienced significantly greater improvement 30-day surgical mortality and failure to rescue rates over time, compared to non-Magnetic hospitals</p>                                                              |                |
| Larson et al., 2000 | Assess the impact of an intervention to change organisational culture on frequency of staff handwashing (as measured by counting devices | Quantitative, interventional study | <p><b>Organisational culture:</b> Handwashing frequency rates estimated from records of activation of soap dispensers in study units</p> <p><b>Patient outcome(s):</b> Rates of nosocomial infections with MRSA and VRE. Data collected by infection control staff in each</p>                                                                     | <p>All staff in adult medical intensive care unit (MICU) and a neonatal intensive care unit (NICU)</p> <p>Duration not specified</p> | Two hospitals (one intervention hospital, once comparison hospital); USA | Over a period of eight months, 860,567 soap dispensings were recorded, with significant improvements in the study hospital after six months of follow-up. There were no significant differences in rates of MRSA between the two hospitals, but rates of VRE were significantly | High           |

| Study             | Study objective(s)                                                                                                                                                                                 | Study design                        | Measures                                                                                                                                                                                                                                         | Participants; Duration                              | Context; Setting   | Key findings                                                                                                                                                                                                                                  | Quality rating |
|-------------------|----------------------------------------------------------------------------------------------------------------------------------------------------------------------------------------------------|-------------------------------------|--------------------------------------------------------------------------------------------------------------------------------------------------------------------------------------------------------------------------------------------------|-----------------------------------------------------|--------------------|-----------------------------------------------------------------------------------------------------------------------------------------------------------------------------------------------------------------------------------------------|----------------|
|                   | inserted into soap dispensers on four critical care units) and nosocomial infections associated with methicillin-resistant Staphylococcus aureus (MRSA) and vancomycin-resistant enterococci (VRE) |                                     | hospital.                                                                                                                                                                                                                                        |                                                     |                    | reduced in the intervention hospital during implementation                                                                                                                                                                                    |                |
| Ma and Park, 2015 | Examine the effects of work environment on patient outcomes at the unit level while adjusting for the influence on hospital-level organisational factors such as                                   | Quantitative, cross-sectional study | <p><b>Work environment:</b><br/>Practice Environment Scale of the Nursing Work Index (PES-NWI)</p> <p><b>Patient outcome(s):</b><br/>Hospital-acquired pressure ulcer rates from the National Database of Nursing Quality Indicators (NDNQI)</p> | 33,845 registered nurses<br><br>Data collected 2013 | 373 hospitals; USA | <p>Units in Magnet hospitals had lower rates of pressure ulcers and better work environments</p> <p>Hospital Magnet status and work environments were significantly associated with pressure ulcer rates after controlling for unit level</p> | High           |



| Study              | Study objective(s)                                                                                                                                                                                                             | Study design                         | Measures                                                                                                                                                                                                                                                                                                       | Participants; Duration                                                                             | Context; Setting                                                                  | Key findings                                                                                                                                                                                                                                                                                                            | Quality rating |
|--------------------|--------------------------------------------------------------------------------------------------------------------------------------------------------------------------------------------------------------------------------|--------------------------------------|----------------------------------------------------------------------------------------------------------------------------------------------------------------------------------------------------------------------------------------------------------------------------------------------------------------|----------------------------------------------------------------------------------------------------|-----------------------------------------------------------------------------------|-------------------------------------------------------------------------------------------------------------------------------------------------------------------------------------------------------------------------------------------------------------------------------------------------------------------------|----------------|
|                    | Magnet status                                                                                                                                                                                                                  |                                      |                                                                                                                                                                                                                                                                                                                |                                                                                                    |                                                                                   | covariates                                                                                                                                                                                                                                                                                                              |                |
| Ma et al., 2015    | Determine the relationships between hospital nursing factors—nurse work environment, nurse staffing, and nurse education—and 30-day readmissions among Medicare patients undergoing general, orthopaedic, and vascular surgery | Quantitative, cross-sectional study  | <p><b>Work environment:</b> Two databases: University of Pennsylvania Multi-State Nursing Care and Patient Safety Study and the American Hospital Association (AHA) Annual Survey</p> <p><b>Patient outcome(s):</b> Medicare Provider and Analysis Review File (MedPAR) measuring 30-day readmission rates</p> | <p>220,914 Medicare surgical patients; 25,082 nurses</p> <p>Data collected July 2006-June 2007</p> | 258 hospitals; USA                                                                | <p>Patients cared for in hospitals with better nurse work environments had lower odds of readmission, independent of nurse staffing levels.</p> <p>Administrative support to nursing practice and nurse-physician relations were two main attributes of the work environment that were associated with readmissions</p> | High           |
| Maben et al., 2012 | Examine the links between staff experience of work and patient experience of                                                                                                                                                   | Mixed-methods, cross-sectional study | <p><b>Organisational climate:</b> Questionnaire assessing organisational and local climate</p> <p><b>Patient outcome(s):</b></p>                                                                                                                                                                               | <p>Survey: 66 staff; 26 patients</p> <p>Interview: 18 staff; 18 patients and carers</p>            | A dedicated service for older people situated in a large acute teaching hospital; | <p>Patients experienced more varied and unpredictable nursing care on those wards with a poor local work climate for staff</p>                                                                                                                                                                                          | Medium         |

| Study               | Study objective(s)                                                                                                                                      | Study design                                                  | Measures                                                                                                                                                                | Participants; Duration                                                                                          | Context; Setting         | Key findings                                                                                                                                                                                                                                                  | Quality rating |
|---------------------|---------------------------------------------------------------------------------------------------------------------------------------------------------|---------------------------------------------------------------|-------------------------------------------------------------------------------------------------------------------------------------------------------------------------|-----------------------------------------------------------------------------------------------------------------|--------------------------|---------------------------------------------------------------------------------------------------------------------------------------------------------------------------------------------------------------------------------------------------------------|----------------|
|                     | care in a 'Medicine for Older People' (MfOP) service in England                                                                                         |                                                               | Patient Evaluation of Emotional Care During Hospitalisation (PEECH); short-form Picker Instrument; additional items from the longer UK NHS National Patient Survey      | Data collected January 2010-August 2010                                                                         | England                  | Emotional labour involved in being a patient was greater in poor care climates where the quality of care was unpredictable and patient experience variable                                                                                                    |                |
| Mahl et al., 2015   | Evaluate the association of perceived organisational culture and quality improvement with the outcomes of infants admitted to level III NICUs in Canada | Quantitative, combined cross-sectional and longitudinal study | <b>Organisational culture:</b> Quality Improvement Implementation Survey (QIIS)<br><br><b>Patient outcome(s):</b> Survival without major morbidity from patient records | 1,133 health care professional;<br>1,028 extremely pre-term infants<br><br>Data collected April 2008-March 2009 | 18 neonatal ICUs; Canada | Higher group culture scores were associated with significantly lower rates of survival without major morbidity<br><br>Higher hierarchical culture and higher quality improvement scores were associated with higher rates of survival without major morbidity | High           |
| Mardon et al., 2010 | Examine relationships between the Agency for Healthcare Research and                                                                                    | Quantitative, cross-sectional study                           | <b>Safety culture:</b> The Agency for Healthcare Research and Quality (AHRQ) Hospital Survey on Patient Safety Culture (HSOPS)                                          | 56,480 hospital employees<br><br>Data collected 2004-2006                                                       | 179 hospitals; USA       | Hospitals with higher patient safety culture scores tended to have lower rates of documented adverse events:                                                                                                                                                  | High           |

1  
2  
3  
4  
5  
6  
7  
8  
9  
10  
11  
12  
13  
14  
15  
16  
17  
18  
19  
20  
21  
22  
23  
24  
25  
26  
27  
28  
29  
30  
31  
32  
33  
34  
35  
36  
37  
38  
39  
40  
41  
42  
43  
44  
45  
46  
47  
48  
49

| Study               | Study objective(s)                                                                                                                                                            | Study design                        | Measures                                                                                                                                                                                                                                                                     | Participants; Duration                                     | Context; Setting   | Key findings                                                                                                                                                                                                                                                                                                                                                 | Quality rating |
|---------------------|-------------------------------------------------------------------------------------------------------------------------------------------------------------------------------|-------------------------------------|------------------------------------------------------------------------------------------------------------------------------------------------------------------------------------------------------------------------------------------------------------------------------|------------------------------------------------------------|--------------------|--------------------------------------------------------------------------------------------------------------------------------------------------------------------------------------------------------------------------------------------------------------------------------------------------------------------------------------------------------------|----------------|
|                     | Quality's (AHRQ) Hospital Survey of Patient Safety Culture and rates of in-hospital complications and adverse events as measured by the AHRQ Patient Safety Indicators (PSIs) |                                     | <b>Patient outcome(s):</b><br>Selected AHRQ Patient Safety Indicators (PSI)                                                                                                                                                                                                  |                                                            |                    | 12/15 HSOPS variables were negatively correlated with PSIs. After controlling for hospital characteristics, seven HSOPS (frequency of events reported, handoffs and transitions, organisational learning—continuous improvement, staffing, teamwork across units, teamwork within units, HSOP composite average) remained statistically correlated with PSIs |                |
| McHugh and Ma, 2013 | Understand how the nursing care environment affects readmissions                                                                                                              | Quantitative, cross-sectional study | <b>Work environment:</b><br>Practice Environment Scale of the Nursing Work Index (PES-NWI); nurse staffing levels; nurse educational attainment<br><br><b>Patient outcome(s):</b> Data on index admissions and readmissions obtained from state discharge abstract databases | 375,681 patients; 20,585 nurses<br><br>Data collected 2006 | 412 hospitals; USA | Care in a hospital with a good versus poor work environment was associated with 7% lower odds of 30-day readmission for heart failure patients, 6% lower odds for acute myocardial infarction patients and 10% lower odds for pneumonia patients                                                                                                             | High           |

| Study                   | Study objective(s)                                                                                                                                                                              | Study design                       | Measures                                                                                                                                                                                                                                  | Participants; Duration                        | Context; Setting                         | Key findings                                                                                                                                                                                                                                                                                  | Quality rating |
|-------------------------|-------------------------------------------------------------------------------------------------------------------------------------------------------------------------------------------------|------------------------------------|-------------------------------------------------------------------------------------------------------------------------------------------------------------------------------------------------------------------------------------------|-----------------------------------------------|------------------------------------------|-----------------------------------------------------------------------------------------------------------------------------------------------------------------------------------------------------------------------------------------------------------------------------------------------|----------------|
|                         |                                                                                                                                                                                                 |                                    |                                                                                                                                                                                                                                           |                                               |                                          | The odds of readmission was 4% lower for heart failure, 3% lower for acute myocardial infarction and 6% lower for pneumonia patients cared for in a hospital with a mixed versus poor work environment                                                                                        |                |
| Meraviglia et al., 2008 | Assist rural or small hospitals (average daily census < 100) with implementing 12 nurse friendly criteria into the policies and practices of the hospital to create a positive work environment | Quantitative, interventional study | <p><b>Work environment:</b><br/>Nursing Work Index-Revised (NWI-R)</p> <p><b>Patient outcome(s):</b><br/>Hospital reported prevalence of pressure ulcers, patient falls, and hospital-acquired pneumonia and urinary tract infections</p> | 1,150 nurses<br><br>Duration not specified    | 30 hospitals; USA                        | <p>There were positive changes in the nurses' perception of their work environment (indicating that the intervention successfully improved organisational culture)</p> <p>Quality of care improved at participating hospitals, as measured by the nurse-sensitive quality indicators (QI)</p> | Medium         |
| Morris A et al., 2007   | Examine the effects of organisational                                                                                                                                                           | Quantitative, longitudinal study   | <p><b>Organisational culture and climate:</b><br/>Questionnaire assessing</p>                                                                                                                                                             | 424 Patients with chronic mental illness; 274 | 14 Community Mental Health Organizations | Organisational culture and climate were strong predictors of perceived                                                                                                                                                                                                                        | High           |

| Study                  | Study objective(s)                                                                                                                                                        | Study design                        | Measures                                                                                                                                                                                                                                                                                           | Participants; Duration                                                                                   | Context; Setting     | Key findings                                                                                             | Quality rating |
|------------------------|---------------------------------------------------------------------------------------------------------------------------------------------------------------------------|-------------------------------------|----------------------------------------------------------------------------------------------------------------------------------------------------------------------------------------------------------------------------------------------------------------------------------------------------|----------------------------------------------------------------------------------------------------------|----------------------|----------------------------------------------------------------------------------------------------------|----------------|
|                        | culture and climate, as well as individual characteristics, on outcomes of care for adults with severe mental illness                                                     |                                     | organisational culture and climate<br><br><b>Patient outcome(s):</b><br>Quality of Life (QOL) index; SF-36; Medicaid claims data; Clinician diagnoses using the DSM IV                                                                                                                             | administrators and health workers<br><br>Data collected over three years; collection dates not specified | (CMHOs); USA         | improvements in physical and mental health status over time, but were not associated with changes in QOL |                |
| Nasirpour et al., 2010 | Determine the relationship of Centralisation and organisational culture and performance indexes in Teaching Hospitals affiliated to Tehran University of Medical Sciences | Quantitative, cross-sectional study | <b>Organisational culture:</b><br>Robbin's organizational culture questionnaire<br><br><b>Patient outcome(s):</b><br>Performance indexes (average length of stay, inpatient bed occupancy ratio, rate of admissions per active bed, net death rate and ratio of surgical operations to inpatients) | 441 personnel<br><br>Data collected 2007                                                                 | 13 hospitals; Iran   | No significant correlation was observed between organisational culture and hospital performance indexes  | Low            |
| Nowinski et al., 2007  | Monitor changes in organisational culture,                                                                                                                                | Quantitative, longitudinal study    | <b>Organisational culture:</b><br>Culture and Quality Questionnaire (CQQ)                                                                                                                                                                                                                          | 621 employees at Baseline and 471 employees at Time 2                                                    | Three hospitals; USA | Several strong correlations were found between changes in culture score and                              | Medium         |

| Study                   | Study objective(s)                                                       | Study design                        | Measures                                                                                                                  | Participants; Duration                          | Context; Setting                         | Key findings                                                                                                                                                                                                                                                                                                                                                                                                                                                                          | Quality rating |
|-------------------------|--------------------------------------------------------------------------|-------------------------------------|---------------------------------------------------------------------------------------------------------------------------|-------------------------------------------------|------------------------------------------|---------------------------------------------------------------------------------------------------------------------------------------------------------------------------------------------------------------------------------------------------------------------------------------------------------------------------------------------------------------------------------------------------------------------------------------------------------------------------------------|----------------|
|                         | continuous quality improvement (QI), maturity and QI indicators overtime |                                     | <b>Patient outcome(s):</b> Press Ganey patient satisfaction survey; multiple standard quality indicators                  | Data collected March 2003-March 2006            |                                          | changes in quality indicators at the three facilities. Appropriate discharge of patients with chest pain was negatively correlated with developmental culture; use of antibiotics within four hours of admission was positively associated with rational culture and quality management and negatively related to group culture and human resource utilisation; and patient satisfaction was positively correlated with group culture and negatively correlated with rational culture |                |
| Prezerakos et al., 2015 | Investigate the correlation between haemodialysis work environment       | Quantitative, cross-sectional study | <b>Work environment:</b> Practice Environment Scale of the Nursing Work Index (PES-NWI)<br><br><b>Patient outcome(s):</b> | 133 nurses<br><br>Data collected June-July 2012 | 11 hospital-based dialysis units; Greece | Hypotension, venous needle disconnection and patient falls were associated with non-favourable work environment                                                                                                                                                                                                                                                                                                                                                                       | High           |

| Study              | Study objective(s)                                       | Study design                        | Measures                                                                                                                                                                                                                                                                                                                                                                                                | Participants; Duration                                   | Context; Setting                                          | Key findings                                                                                                                                                                                                                                                                                              | Quality rating |
|--------------------|----------------------------------------------------------|-------------------------------------|---------------------------------------------------------------------------------------------------------------------------------------------------------------------------------------------------------------------------------------------------------------------------------------------------------------------------------------------------------------------------------------------------------|----------------------------------------------------------|-----------------------------------------------------------|-----------------------------------------------------------------------------------------------------------------------------------------------------------------------------------------------------------------------------------------------------------------------------------------------------------|----------------|
|                    | and patients' outcomes                                   |                                     | Questionnaire assessing how often selected errors and adverse events have occurred under the nursing care during the previous three months                                                                                                                                                                                                                                                              |                                                          |                                                           | Hypoglycaemia, medication error and catheter-associated infections were not associated with work environment                                                                                                                                                                                              |                |
| Purdy et al., 2010 | Determine impact of the work environment on patient care | Quantitative, cross-sectional study | <p><b>Work environment:</b> Work Effectiveness Questionnaire (CWEQ-II); Work Group Characteristics Measure; Psychological Empowerment Questionnaire (PEQ)</p> <p><b>Patient outcome(s):</b> Patient falls and nurse assessed risks, measured using an instrument developed by Sochalski (2001); Nursing Care Quality Questionnaire (PSNCQQ); Therapeutic Self-care Questionnaire-Acute Care Version</p> | 679 nurses; 1,005 patients<br><br>Duration not specified | 61 medical and surgical units across 21 hospitals; Canada | Structural empowerment, mediated through group processes, significantly impacted a variety of patient outcomes including nurse-assessed quality and risk as well as an objective measure of patient falls although no significant effect was found for variables assessed using the patient's perspective | High           |
| Saame et al., 2011 | Outline the relationships                                | Quantitative, cross-                | <b>Organisational culture:</b> Organisational Values                                                                                                                                                                                                                                                                                                                                                    | 456 medical and non-medical                              | One hospital (including two                               | Clinics with high patient satisfaction did not score                                                                                                                                                                                                                                                      | Medium         |

| Study               | Study objective(s)                                                                                                                                                                     | Study design                        | Measures                                                                                                                                                                                                                                                                                                                                                           | Participants; Duration                                           | Context; Setting                                                   | Key findings                                                                                                                                                                                                                                                                                               | Quality rating |
|---------------------|----------------------------------------------------------------------------------------------------------------------------------------------------------------------------------------|-------------------------------------|--------------------------------------------------------------------------------------------------------------------------------------------------------------------------------------------------------------------------------------------------------------------------------------------------------------------------------------------------------------------|------------------------------------------------------------------|--------------------------------------------------------------------|------------------------------------------------------------------------------------------------------------------------------------------------------------------------------------------------------------------------------------------------------------------------------------------------------------|----------------|
|                     | between organisational culture and patient satisfaction                                                                                                                                | sectional study                     | Questionnaire (OVQ)<br><br><b>Patient outcome(s):</b><br>Patient satisfaction ratings                                                                                                                                                                                                                                                                              | professionals<br><br>Data collected October 2005-February 2006   | clinics with high patient satisfaction and four with low); Estonia | more than clinics with low patient satisfaction in terms of the Human Relations type<br><br>Clinics with high patient satisfaction were less oriented towards Rational Goal type values than clinics with low patient satisfaction                                                                         |                |
| Scotti et al., 2007 | Examine how a high-involvement approach to the work environment of healthcare employees may lead to exceptional service quality, satisfied patients, and ultimately to loyal customers | Mixed-methods cross-sectional study | <b>Work climate:</b><br>Questionnaire assessing human resource practices, customer orientation and employee-perceived service quality based on pre-existing Veterans' Affairs Questionnaire<br><br><b>Patient outcome(s):</b><br>Questionnaire assessing customer perceived quality and customer satisfaction based on pre-existing Veterans Health Administration | 59,464 employees; 212,874 respondents<br><br>Data collected 2001 | 113 Veterans Health Administration ambulatory care centres; USA    | High-performance work systems are linked to employee perceptions of their ability to deliver high-quality customer service, both directly and through their perceptions of customer orientation<br><br>Employee perceptions of customer service are linked to customer perceptions of high-quality service | High           |



1  
2  
3  
4  
5  
6  
7  
8  
9  
10  
11  
12  
13  
14  
15  
16  
17  
18  
19  
20  
21  
22  
23  
24  
25  
26  
27  
28  
29  
30  
31  
32  
33  
34  
35  
36  
37  
38  
39  
40  
41  
42  
43  
44  
45  
46  
47  
48  
49

| Study                 | Study objective(s)                                                                                                    | Study design                        | Measures                                                                                                                                                                                                                                                                                                                                                                                                                         | Participants; Duration                                                                                                                                                                                                                                                                               | Context; Setting                    | Key findings                                                                                                                                                                                                                                                                                                   | Quality rating |
|-----------------------|-----------------------------------------------------------------------------------------------------------------------|-------------------------------------|----------------------------------------------------------------------------------------------------------------------------------------------------------------------------------------------------------------------------------------------------------------------------------------------------------------------------------------------------------------------------------------------------------------------------------|------------------------------------------------------------------------------------------------------------------------------------------------------------------------------------------------------------------------------------------------------------------------------------------------------|-------------------------------------|----------------------------------------------------------------------------------------------------------------------------------------------------------------------------------------------------------------------------------------------------------------------------------------------------------------|----------------|
|                       |                                                                                                                       |                                     | Questionnaire                                                                                                                                                                                                                                                                                                                                                                                                                    |                                                                                                                                                                                                                                                                                                      |                                     | Perceived service quality is linked with customer satisfaction                                                                                                                                                                                                                                                 |                |
| Shortell et al., 1995 | Examine the relationships between organisational culture, quality improvement processes and selected patient outcomes | Quantitative, cross-sectional study | <p><b>Organisational culture:</b> 20-item questionnaire developed by Zammuto and Krakower (1991) assessing group culture, developmental culture, hierarchical culture, and rational culture scales</p> <p><b>Patient outcome(s):</b> A patient outcome impact scale assessing improved patient outcomes, reduced errors and inappropriate treatment, increased patient satisfaction, and improved continuity of patient care</p> | <p>Continuous quality improvement and total quality management: an unspecified number of CEOs and person in charge of quality assessment</p> <p>Organisational culture: 7,337 hospital staff</p> <p>Implementation: Approximately 50 respondents from per hospital</p> <p>Duration not specified</p> | 61 hospitals; USA                   | <p>A participative, flexible, risk-taking organisational culture was significantly related to quality improvement implementation</p> <p>Quality improvement implementation was significantly associated with greater perceived patient outcomes and human resource development, but not financial outcomes</p> | Medium         |
| Shortell et al., 2000 | Test impact of total quality management                                                                               | Quantitative, longitudinal study    | <b>Organisational culture:</b> Previously validated 20-item questionnaire                                                                                                                                                                                                                                                                                                                                                        | 3,045 patients; an average of 54 staff per hospital                                                                                                                                                                                                                                                  | 16 nongovernmental, not-for-profit, | A supportive group culture was significantly associated with shorter                                                                                                                                                                                                                                           | High           |

| Study               | Study objective(s)                                                                                                           | Study design                        | Measures                                                                                                                                                                                                                                                                                                                             | Participants; Duration                                | Context; Setting                                                            | Key findings                                                                                                                                                                                                                                                                      | Quality rating |
|---------------------|------------------------------------------------------------------------------------------------------------------------------|-------------------------------------|--------------------------------------------------------------------------------------------------------------------------------------------------------------------------------------------------------------------------------------------------------------------------------------------------------------------------------------|-------------------------------------------------------|-----------------------------------------------------------------------------|-----------------------------------------------------------------------------------------------------------------------------------------------------------------------------------------------------------------------------------------------------------------------------------|----------------|
|                     | (TQM) and organisational culture on a comprehensive set of endpoints of care for coronary artery bypass graft surgery (CABG) |                                     | developed by Zammuto and Krakower (1991)<br><br><b>Patient outcome(s):</b> CABG care endpoints (mortality, adverse outcome, clinical efficiency); Patient satisfaction questionnaire consisting of Patient Judgment System 24-item (PJS-24) questionnaire, 'returning to home issues' items, and 'the needs of heart patients' items | Data collected 1995-1996                              | short-term-care general service hospitals engaged in TQM interventions; USA | postoperative intubation times, and higher patient physical and mental functional health status scores six months after CABG, but also with longer operating room times<br><br>There was little effect of organisational culture on multiple end-points of care for CABG patients |                |
| Singer et al., 2009 | Study the relationship between safety climate and safety performance using Patient Safety Indicators (PSIs)                  | Quantitative, cross-sectional study | <b>Safety climate:</b> Patient Safety Climate in Healthcare Organizations (PSCHO) 2004<br><br><b>Patient outcome(s):</b> The Medicare Provider Analysis and Review (MEDPAR) File from 2005                                                                                                                                           | 18,223 hospital staff<br><br>Data collected 2004-2005 | 91 hospitals; USA                                                           | Higher levels of safety climate were associated with higher safety performance<br><br>Hospitals in which personnel reported more problems with fear of shame and blame had significantly greater risk of experiencing PSIs<br><br>Perceptions of higher                           | High           |

1  
2  
3  
4  
5  
6  
7  
8  
9  
10  
11  
12  
13  
14  
15  
16  
17  
18  
19  
20  
21  
22  
23  
24  
25  
26  
27  
28  
29  
30  
31  
32  
33  
34  
35  
36  
37  
38  
39  
40  
41  
42  
43  
44  
45  
46  
47  
48  
49

| Study              | Study objective(s)                                                                                                      | Study design                        | Measures                                                                                                                                                                                                                                                                                                                                                                                                         | Participants; Duration                               | Context; Setting                                       | Key findings                                                                                                                                                                                                                                                                                                                                                                       | Quality rating |
|--------------------|-------------------------------------------------------------------------------------------------------------------------|-------------------------------------|------------------------------------------------------------------------------------------------------------------------------------------------------------------------------------------------------------------------------------------------------------------------------------------------------------------------------------------------------------------------------------------------------------------|------------------------------------------------------|--------------------------------------------------------|------------------------------------------------------------------------------------------------------------------------------------------------------------------------------------------------------------------------------------------------------------------------------------------------------------------------------------------------------------------------------------|----------------|
|                    |                                                                                                                         |                                     |                                                                                                                                                                                                                                                                                                                                                                                                                  |                                                      |                                                        | safety climate overall among frontline personnel were associated with a relative increase in the risk of experiencing PSIs, but safety climate perceptions overall among senior managers were not                                                                                                                                                                                  |                |
| Stone et al., 2007 | Examine effects of a comprehensive set of working conditions on elderly patient safety outcomes in intensive care units | Quantitative, cross-sectional study | <p><b>Organisational climate:</b><br/>Perceptions of Nurse Work Environment Scale; administrative processes derived from monthly payroll data; monthly total ICU patient census data; Bureau of Labor Statistics regional estimates of RN salary</p> <p><b>Patient outcome(s):</b><br/>Central line associated bloodstream infection (CLBSI), ventilator associated pneumonia (VAP), and catheter-associated</p> | 15,846 patients; 1,095 nurses<br>Data collected 2002 | 51 adult intensive care units across 31 hospitals; USA | <p>Units with higher staffing had lower incidence of CLBSI, VAP, 30-day mortality, and decubiti</p> <p>Increased overtime was associated with higher rates of CAUTI and decubiti, but slightly lower rates of CLBSI</p> <p>The effects of organisational climate on patient safety outcomes were inconsistent. Patients admitted to ICUs in which the nurses' perceived a more</p> | High           |

| Study                       | Study objective(s)                                                                                                                              | Study design                        | Measures                                                                                                                                                                                                                                                                                                                                                 | Participants; Duration                                                                                                 | Context; Setting                                | Key findings                                                                                                                                                                                            | Quality rating |
|-----------------------------|-------------------------------------------------------------------------------------------------------------------------------------------------|-------------------------------------|----------------------------------------------------------------------------------------------------------------------------------------------------------------------------------------------------------------------------------------------------------------------------------------------------------------------------------------------------------|------------------------------------------------------------------------------------------------------------------------|-------------------------------------------------|---------------------------------------------------------------------------------------------------------------------------------------------------------------------------------------------------------|----------------|
|                             |                                                                                                                                                 |                                     | urinary tract infection (CAUTI) derived from Nosocomial Infections Surveillance's (NNIS) system of infection surveillance; 30-day mortality and decubiti were determined using Medicare files                                                                                                                                                            |                                                                                                                        |                                                 | positive organisational climate had slightly higher odds of developing a CLBSI, but were 39% less likely to develop a CAUTI                                                                             |                |
| Taylor et al., 2012         | Investigate the extent to which organisational characteristics (working conditions and safety climate) predict injuries for patients and nurses | Quantitative, cross-sectional study | <p><b>Safety climate:</b> Safety Attitudes Questionnaire (SAQ); unit turnover rates; registered nursing hours per day data obtained from Human Resources</p> <p><b>Patient outcome(s):</b> Patient injuries (falls, pressure ulcers, and pulmonary embolism/deep vein thrombosis) from administrative discharge data and Patient Safety Net software</p> | <p>723 nurses; 28,876 patient discharges</p> <p>Data collected:<br/>Safety climate: 2004<br/>Injury outcomes: 2005</p> | A trauma centre with Magnet nursing status; USA | <p>Safety culture was significantly associated with patient outcomes e.g., falls, decubitus ulcers and PE/DVT</p> <p>Working conditions were significantly associated with patient and nurse injury</p> | High           |
| Tei-Tominaga and Sato, 2016 | Examine the effect of nurses' work environment                                                                                                  | Quantitative, cross-sectional study | <b>Work environment:</b> Japanese version of the Practice Environment Scale of the Nursing Work Index                                                                                                                                                                                                                                                    | <p>425 nurses; 379 inpatients</p> <p>Data collected</p>                                                                | Four hospitals; Japan                           | Hospitals in Japan with a work environment that nurses perceive to be similar to the work                                                                                                               | High           |

1  
2  
3  
4  
5  
6  
7  
8  
9  
10  
11  
12  
13  
14  
15  
16  
17  
18  
19  
20  
21  
22  
23  
24  
25  
26  
27  
28  
29  
30  
31  
32  
33  
34  
35  
36  
37  
38  
39  
40  
41  
42  
43  
44  
45  
46  
47  
48  
49

| Study                       | Study objective(s)                                                                                                                                                                      | Study design                        | Measures                                                                                                                                                                                                                                      | Participants; Duration                                                    | Context; Setting                      | Key findings                                                                                                                                                                                                                                                                                                     | Quality rating |
|-----------------------------|-----------------------------------------------------------------------------------------------------------------------------------------------------------------------------------------|-------------------------------------|-----------------------------------------------------------------------------------------------------------------------------------------------------------------------------------------------------------------------------------------------|---------------------------------------------------------------------------|---------------------------------------|------------------------------------------------------------------------------------------------------------------------------------------------------------------------------------------------------------------------------------------------------------------------------------------------------------------|----------------|
|                             | with characteristics that are similar to those of Magnet hospitals on patient satisfaction in Japan                                                                                     |                                     | (PES-NWI)<br><br><b>Patient outcome(s):</b><br>Questionnaire assessing information about hospitalisation (number of hospitalisations, duration of hospitalisation, having operative treatment), and patient satisfaction                      | August 2011                                                               |                                       | environment in Magnet hospitals were associated with patient satisfaction<br><br>Specifically, collegial nurse-physician relations was associated with low patient satisfaction, however this association was weak, and diminished when hospital characteristics were considered in the analysis                 |                |
| Temkin-Greener et al., 2010 | Examine the association between nursing home (NH) work environment attributes such as teams, consistent assignment and staff cohesion, and the risk of pressure ulcers and incontinence | Quantitative, cross-sectional study | <b>Work environment:</b><br>Questionnaire purpose designed for the study assessing staff cohesion, presence of teams and consistent assignment<br><br><b>Patient outcome(s):</b><br>Pressure ulcer and incontinence from the Minimum Data Set | 46,044 residents; 7,418 workers<br><br>Data collected June 2006-July 2007 | 162 long-term care nursing homes; USA | Residents in facilities with worse staff cohesion had significantly greater odds of pressure ulcers and incontinence, compared with residents in facilities with better cohesion scores<br><br>Residents in facilities with greater penetration of self-managed teams had lower risk of pressure ulcers, but not | High           |

| Study                        | Study objective(s)                                                                                          | Study design                        | Measures                                                                                                                                                                                                                                              | Participants; Duration                                                       | Context; Setting                                                                                   | Key findings                                                                                                                                          | Quality rating |
|------------------------------|-------------------------------------------------------------------------------------------------------------|-------------------------------------|-------------------------------------------------------------------------------------------------------------------------------------------------------------------------------------------------------------------------------------------------------|------------------------------------------------------------------------------|----------------------------------------------------------------------------------------------------|-------------------------------------------------------------------------------------------------------------------------------------------------------|----------------|
|                              |                                                                                                             |                                     |                                                                                                                                                                                                                                                       |                                                                              |                                                                                                    | of incontinence<br><br>Prevalence of consistent assignment was not significantly associated with pressure ulcers or incontinence                      |                |
| Tervo-Heikkinen et al., 2008 | Assess the interrelationships between nurses' work environment and nursing outcomes                         | Quantitative, cross-sectional study | <b>Work environment:</b> Registered Nurse Working Conditions Barometry Index-revised (RN-WCBI-R); items from the Nurse Work Index-revised (NWI-R)<br><br><b>Patient outcome(s):</b> Total satisfaction indicator from the Humane Caring Scale-revised | 664 registered nurses (RN); 1,730 patients<br><br>Data collected during 2005 | 34 acute care inpatient hospital wards across four hospitals; Finland                              | Professional nursing standards staffing adequacy, and nursing respect and relationships were found to be important predictors of patient satisfaction | High           |
| Tzeng et al., 2002           | Investigate the relationship among staff nurses' assessment of organisational culture and general inpatient | Quantitative, cross-sectional study | <b>Organisational culture:</b> Nurse Assessment Survey (NAS)<br><br><b>Patient outcome(s):</b> Nursing Services Inpatient Satisfaction Survey (NSISS)                                                                                                 | 520 registered nurses; 345 patients<br><br>Duration not specified            | 13 medical/surgical adult units; two adult psychiatric units; two gynaecology/obstetric units; USA | Strength of culture had indirect positive effects (through nurse satisfaction) on patient satisfaction                                                | Medium         |

| Study                 | Study objective(s)                                                                                                                                                | Study design                        | Measures                                                                                                                                                                                                                                                                                                                                                                                                                                  | Participants; Duration                                                        | Context; Setting        | Key findings                                                                                                                                                                                                                                                                                                                                                                      | Quality rating |
|-----------------------|-------------------------------------------------------------------------------------------------------------------------------------------------------------------|-------------------------------------|-------------------------------------------------------------------------------------------------------------------------------------------------------------------------------------------------------------------------------------------------------------------------------------------------------------------------------------------------------------------------------------------------------------------------------------------|-------------------------------------------------------------------------------|-------------------------|-----------------------------------------------------------------------------------------------------------------------------------------------------------------------------------------------------------------------------------------------------------------------------------------------------------------------------------------------------------------------------------|----------------|
|                       | satisfaction with nursing care                                                                                                                                    |                                     |                                                                                                                                                                                                                                                                                                                                                                                                                                           |                                                                               |                         |                                                                                                                                                                                                                                                                                                                                                                                   |                |
| Virtanen et al., 2009 | Examine the association between work hours, work stress, and collaboration among the ward personnel, and the risk of hospital-associated infection among patients | Quantitative, cross-sectional study | <p><b>Organisational climate:</b> Questionnaire measuring mean working hours, work stress (job strain and effort-reward imbalance), and collaboration (communication, justice in the distribution of work, support from supervisor, and quality of the collaboration between supervisors in the ward)</p> <p><b>Patient outcome(s):</b> Hospital-associated infection derived from medical records and infection surveillance records</p> | <p>1,092 patients; 1,159 staff</p> <p>Data collected March 2004-June 2004</p> | Six hospitals; Finland  | <p>Long working hours among staff, high work stress, and problems in collaboration between personnel were related to infection among patients</p> <p>High effort-reward imbalance, low trust between ward members, injustice in the distribution of work, and poor collaboration between supervisors were all related to approximately a 2-fold infection risk among patients</p> | High           |
| Warren et al., 2007   | Explore the association between health care employees' perceptions of                                                                                             | Quantitative, cross-sectional study | <p><b>Organisational climate:</b> All Employee Survey (AES) comprising questions from the National Institute for Occupational Safety and Health</p>                                                                                                                                                                                                                                                                                       | <p>74,662 employees of the VHA</p> <p>Data collected 2001</p>                 | 141 VHA facilities; USA | <p>There was a relationship between some patient outcomes and organisational culture</p> <p>Patient satisfaction</p>                                                                                                                                                                                                                                                              | High           |

| Study                 | Study objective(s)                                                                                          | Study design                        | Measures                                                                                                                                                                                                                                                                                                                           | Participants; Duration                                                                             | Context; Setting                                             | Key findings                                                                                                                                                                                                                                                     | Quality rating |
|-----------------------|-------------------------------------------------------------------------------------------------------------|-------------------------------------|------------------------------------------------------------------------------------------------------------------------------------------------------------------------------------------------------------------------------------------------------------------------------------------------------------------------------------|----------------------------------------------------------------------------------------------------|--------------------------------------------------------------|------------------------------------------------------------------------------------------------------------------------------------------------------------------------------------------------------------------------------------------------------------------|----------------|
|                       | their organisations and objective measures of system performance (including employee and patient outcomes). |                                     | (NIOSH) Instrument and the Organizational Assessment Survey (OAS); Bureau of Labor Statistics Survey of Employment; Federal Aviation Administration Instrument<br><br><b>Patient outcome(s):</b> AES measuring attitudinal outcomes, and health and safety outcomes; Administrative Veterans Health Administration (VHA) Data Sets |                                                                                                    |                                                              | demonstrated the strongest connection with organisational climate. Inpatient and outpatient satisfaction was strongly related to increased levels of support, and increased inpatient satisfaction is also associated with higher levels of Professional Demands |                |
| Weinberg et al., 2013 | Examine the benefits of a high-performance work environment (HPWE) for employees, patients, and hospitals   | Quantitative, cross-sectional study | <b>Work environment:</b> Questionnaire based on Revised Nursing Work Index, Picker Hospital Employee Survey; variety of tools from other workplace settings, with particular focus on research on high-performance work systems and teams                                                                                          | 16,459 discharge records; 2,920 patient surveys; 1,527 staff surveys<br><br>Duration not specified | 45 units across nine hospitals and seven health systems; USA | HPWE was significantly associated with patients' experience and safety. HPWE was related to lower odds that a patient will experience an adverse outcome during the hospital stay                                                                                | High           |



1  
2  
3  
4  
5  
6  
7  
8  
9  
10  
11  
12  
13  
14  
15  
16  
17  
18  
19  
20  
21  
22  
23  
24  
25  
26  
27  
28  
29  
30  
31  
32  
33  
34  
35  
36  
37  
38  
39  
40  
41  
42  
43  
44  
45  
46  
47  
48  
49

| Study            | Study objective(s)                                                       | Study design                        | Measures                                                                                                                                                                                                                                                                 | Participants; Duration                                                           | Context; Setting     | Key findings                                                                                                                                                                                                                                                                                                                                                  | Quality rating |
|------------------|--------------------------------------------------------------------------|-------------------------------------|--------------------------------------------------------------------------------------------------------------------------------------------------------------------------------------------------------------------------------------------------------------------------|----------------------------------------------------------------------------------|----------------------|---------------------------------------------------------------------------------------------------------------------------------------------------------------------------------------------------------------------------------------------------------------------------------------------------------------------------------------------------------------|----------------|
|                  |                                                                          |                                     | <b>Patient outcome(s):</b><br>Hospital Consumer Assessment of Healthcare Providers and Systems (HCAHPS); discharge data                                                                                                                                                  |                                                                                  |                      |                                                                                                                                                                                                                                                                                                                                                               |                |
| You et al., 2013 | Evaluate the link between nurse resources and nurse and patient outcomes | Quantitative, cross-sectional study | <b>Work environment:</b><br>Four of the five subscales of the Practice Environment Scale of the Nursing Work Index (PES-NWI)<br><br><b>Patient outcome(s):</b><br>Adapted version of the Consumer Assessment of Healthcare Providers and Systems (CAHPS) Hospital Survey | 9,688 staff (nurses in particular); 5,786 patients<br><br>Duration not specified | 181 hospitals; China | Patients in hospitals with better work environments were more likely to rate their hospital highly, to be satisfied with nursing communications, and to recommend their hospitals<br><br>Higher patient-to-nurse ratios were unrelated to patient outcomes<br><br>Higher percentages of baccalaureate nurses were strongly related to better patient outcomes | High           |
| Zhou P, 2011     | Determine whether perceptions of organisational                          | Quantitative, cross-sectional study | <b>Organisational culture:</b><br>Employee questionnaire measuring organisational culture                                                                                                                                                                                | 3,437 staff; 8,276 patients<br><br>Data collected                                | 87 hospitals; China  | Culture emphasising social responsibility was negatively associated with length of stay                                                                                                                                                                                                                                                                       | High           |

| Study | Study objective(s)                                                                            | Study design | Measures                                                                                                                                                                                                                      | Participants;<br>Duration | Context; Setting | Key findings                                                                                                                                                                                                                                                                              | Quality rating |
|-------|-----------------------------------------------------------------------------------------------|--------------|-------------------------------------------------------------------------------------------------------------------------------------------------------------------------------------------------------------------------------|---------------------------|------------------|-------------------------------------------------------------------------------------------------------------------------------------------------------------------------------------------------------------------------------------------------------------------------------------------|----------------|
|       | culture among employees of public hospitals in China are associated with hospital performance |              | <b>Patient outcome(s):</b><br>Hospital questionnaire assessing performance outcomes such as LOS, outpatient visits per year, bed days per year, patient satisfaction; patient survey measuring satisfaction with medical care | June-October 2009         |                  | Hospitals with culture emphasising cost control had higher rates of outpatient visits and BDPPPD, as well as lower levels of patient satisfaction<br><br>Hospitals in which employees perceived the culture as customer-focused had longer length of stays but lower patient satisfaction |                |

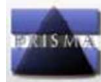

# PRISMA 2009 Checklist

| Section/topic                      | #  | Checklist item                                                                                                                                                                                                                                                                                              | Reported on page #                        |
|------------------------------------|----|-------------------------------------------------------------------------------------------------------------------------------------------------------------------------------------------------------------------------------------------------------------------------------------------------------------|-------------------------------------------|
| <b>TITLE</b>                       |    |                                                                                                                                                                                                                                                                                                             |                                           |
| Title                              | 1  | Identify the report as a systematic review, meta-analysis, or both.                                                                                                                                                                                                                                         | 1, 4                                      |
| <b>ABSTRACT</b>                    |    |                                                                                                                                                                                                                                                                                                             |                                           |
| Structured summary                 | 2  | Provide a structured summary including, as applicable: background; objectives; data sources; study eligibility criteria, participants, and interventions; study appraisal and synthesis methods; results; limitations; conclusions and implications of key findings; systematic review registration number. | 2                                         |
| <b>INTRODUCTION</b>                |    |                                                                                                                                                                                                                                                                                                             |                                           |
| Rationale                          | 3  | Describe the rationale for the review in the context of what is already known.                                                                                                                                                                                                                              | 4                                         |
| Objectives                         | 4  | Provide an explicit statement of questions being addressed with reference to participants, interventions, comparisons, outcomes, and study design (PICOS).                                                                                                                                                  | 6-7                                       |
| <b>METHODS</b>                     |    |                                                                                                                                                                                                                                                                                                             |                                           |
| Protocol and registration          | 5  | Indicate if a review protocol exists, if and where it can be accessed (e.g., Web address), and, if available, provide registration information including registration number.                                                                                                                               | 6                                         |
| Eligibility criteria               | 6  | Specify study characteristics (e.g., PICOS, length of follow-up) and report characteristics (e.g., years considered, language, publication status) used as criteria for eligibility, giving rationale.                                                                                                      | 6-7                                       |
| Information sources                | 7  | Describe all information sources (e.g., databases with dates of coverage, contact with study authors to identify additional studies) in the search and date last searched.                                                                                                                                  | 6                                         |
| Search                             | 8  | Present full electronic search strategy for at least one database, including any limits used, such that it could be repeated.                                                                                                                                                                               | 6, full search strategy in protocol paper |
| Study selection                    | 9  | State the process for selecting studies (i.e., screening, eligibility, included in systematic review, and, if applicable, included in the meta-analysis).                                                                                                                                                   | 6-7                                       |
| Data collection process            | 10 | Describe method of data extraction from reports (e.g., piloted forms, independently, in duplicate) and any processes for obtaining and confirming data from investigators.                                                                                                                                  | 6-7                                       |
| Data items                         | 11 | List and define all variables for which data were sought (e.g., PICOS, funding sources) and any assumptions and simplifications made.                                                                                                                                                                       | 6-7                                       |
| Risk of bias in individual studies | 12 | Describe methods used for assessing risk of bias of individual studies (including specification of whether this was done at the study or outcome level); and how this information is to be used in any data synthesis.                                                                                      | 7-8                                       |

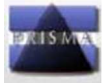

# PRISMA 2009 Checklist

|                      |    |                                                                                                                                                           |     |
|----------------------|----|-----------------------------------------------------------------------------------------------------------------------------------------------------------|-----|
| Summary measures     | 13 | State the principal summary measures (e.g., risk ratio, difference in means).                                                                             | 4-5 |
| Synthesis of results | 14 | Describe the methods of handling data and combining results of studies, if done, including measures of consistency (e.g., $I^2$ ) for each meta-analysis. | N/A |

Page 1 of 2

| Section/topic                 | #  | Checklist item                                                                                                                                                                                           | Reported on page # |
|-------------------------------|----|----------------------------------------------------------------------------------------------------------------------------------------------------------------------------------------------------------|--------------------|
| Risk of bias across studies   | 15 | Specify any assessment of risk of bias that may affect the cumulative evidence (e.g., publication bias, selective reporting within studies).                                                             | 7                  |
| Additional analyses           | 16 | Describe methods of additional analyses (e.g., sensitivity or subgroup analyses, meta-regression), if done, indicating which were pre-specified.                                                         | N/A                |
| <b>RESULTS</b>                |    |                                                                                                                                                                                                          |                    |
| Study selection               | 17 | Give numbers of studies screened, assessed for eligibility, and included in the review, with reasons for exclusions at each stage, ideally with a flow diagram.                                          | 8                  |
| Study characteristics         | 18 | For each study, present characteristics for which data were extracted (e.g., study size, PICOS, follow-up period) and provide the citations.                                                             | 8-10               |
| Risk of bias within studies   | 19 | Present data on risk of bias of each study and, if available, any outcome level assessment (see item 12).                                                                                                | 10                 |
| Results of individual studies | 20 | For all outcomes considered (benefits or harms), present, for each study: (a) simple summary data for each intervention group (b) effect estimates and confidence intervals, ideally with a forest plot. | 10-15              |
| Synthesis of results          | 21 | Present results of each meta-analysis done, including confidence intervals and measures of consistency.                                                                                                  | N/A                |
| Risk of bias across studies   | 22 | Present results of any assessment of risk of bias across studies (see Item 15).                                                                                                                          | 10                 |
| Additional analysis           | 23 | Give results of additional analyses, if done (e.g., sensitivity or subgroup analyses, meta-regression [see Item 16]).                                                                                    | N/A                |
| <b>DISCUSSION</b>             |    |                                                                                                                                                                                                          |                    |
| Summary of evidence           | 24 | Summarize the main findings including the strength of evidence for each main outcome; consider their relevance to key groups (e.g., healthcare providers, users, and policy makers).                     | 16-17              |
| Limitations                   | 25 | Discuss limitations at study and outcome level (e.g., risk of bias), and at review-level (e.g., incomplete retrieval of identified research, reporting bias).                                            | 17                 |
| Conclusions                   | 26 | Provide a general interpretation of the results in the context of other evidence, and implications for future research.                                                                                  | 17-18              |
| <b>FUNDING</b>                |    |                                                                                                                                                                                                          |                    |
| Funding                       | 27 | Describe sources of funding for the systematic review and other support (e.g., supply of data); role of funders for the systematic review.                                                               | 18                 |

For peer review only - <http://bmjopen.bmj.com/site/about/guidelines.xhtml>

From: Moher D, Liberati A, Tetzlaff J, Altman DG, The PRISMA Group (2009). Preferred Reporting Items for Systematic Reviews and Meta-Analyses: The PRISMA Statement. PLoS Med 6(7): e1000097.

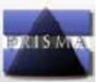

# PRISMA 2009 Checklist

1  
2  
3  
4  
5  
6  
7  
8  
9  
10  
11  
12  
13  
14  
15  
16  
17  
18  
19  
20  
21  
22  
23  
24  
25  
26  
27  
28  
29  
30  
31  
32  
33  
34  
35  
36  
37  
38  
39  
40  
41  
42  
43  
44  
45  
46  
47  
48  
49

doi:10.1371/journal.pmed1000097

For more information, visit: [www.prisma-statement.org](http://www.prisma-statement.org).

Page 2 of 2

For peer review only

# BMJ Open

## The association between organisational and workplace cultures, and patient outcomes: systematic review

|                                 |                                                                                                                                                                                                                                                                                                                                                                                                                                    |
|---------------------------------|------------------------------------------------------------------------------------------------------------------------------------------------------------------------------------------------------------------------------------------------------------------------------------------------------------------------------------------------------------------------------------------------------------------------------------|
| Journal:                        | <i>BMJ Open</i>                                                                                                                                                                                                                                                                                                                                                                                                                    |
| Manuscript ID                   | bmjopen-2017-017708.R1                                                                                                                                                                                                                                                                                                                                                                                                             |
| Article Type:                   | Research                                                                                                                                                                                                                                                                                                                                                                                                                           |
| Date Submitted by the Author:   | 07-Aug-2017                                                                                                                                                                                                                                                                                                                                                                                                                        |
| Complete List of Authors:       | Braithwaite, Jeffrey; Macquarie University, Australian Institute of Health Innovation<br>Herkes, Jessica; Macquarie University, Australian Institute of Health Innovation<br>Ludlow, Kristiana; Macquarie University, Australian Institute of Health Innovation<br>Testa, Luke; Macquarie University, Australian Institute of Health Innovation<br>Lamprell, Gina; Macquarie University, Australian Institute of Health Innovation |
| <b>Primary Subject Heading</b>: | Health services research                                                                                                                                                                                                                                                                                                                                                                                                           |
| Secondary Subject Heading:      | Health services research, Sociology, Medical management, Public health                                                                                                                                                                                                                                                                                                                                                             |
| Keywords:                       | Health & safety < HEALTH SERVICES ADMINISTRATION & MANAGEMENT, Health policy < HEALTH SERVICES ADMINISTRATION & MANAGEMENT, PUBLIC HEALTH, Quality in health care < HEALTH SERVICES ADMINISTRATION & MANAGEMENT, Clinical governance < HEALTH SERVICES ADMINISTRATION & MANAGEMENT, Organisational development < HEALTH SERVICES ADMINISTRATION & MANAGEMENT                                                                       |
|                                 |                                                                                                                                                                                                                                                                                                                                                                                                                                    |

SCHOLARONE™  
Manuscripts

1  
2  
3 1 **The association between organisational and workplace cultures, and patient outcomes:**  
4 2 **systematic review**  
5  
6  
7 3

8 4 **Braithwaite, J<sup>1</sup>,\* Herkes, J<sup>1</sup>, Ludlow, K<sup>1</sup>, Testa, L<sup>1</sup>, Lamprell, G<sup>1</sup>**

9  
10 5 <sup>1</sup>Australian Institute of Health Innovation, Macquarie University  
11  
12 6

13  
14 7 \*Corresponding Author

15 8 Level 6, 75 Talavera Rd

16 9 Macquarie University

17 10 Sydney, NSW 2109

18 11 Australia

19 12 P + 61 2 9850 2401 | F + 61 2 8088 6234

20 13 email: [jeffrey.braithwaite@mq.edu.au](mailto:jeffrey.braithwaite@mq.edu.au)  
21  
22  
23  
24  
25  
26  
27  
28  
29  
30  
31  
32  
33  
34  
35  
36  
37  
38  
39  
40  
41  
42  
43  
44  
45  
46  
47  
48  
49  
50  
51  
52  
53  
54  
55  
56  
57  
58  
59  
60

15 15 **Jeffrey BRAITHWAITE**,\* PhD

16 16 **Jessica HERKES**, BSc (Adv)

17 17 **Kristiana LUDLOW**, BPsych (Hons)

18 18 **Luke TESTA**, MPH

19 19 **Gina LAMPRELL**, BA (Hons)

21 21 **Keywords**

22 22 Health & safety; health policy; public health; quality in healthcare; clinical governance;  
23 23 organisational development.  
24  
25

**Manuscript data**

**Number of pages (including references):** 34 (without tracks)

**Word count (Body):** 3,607

**Word count (Abstract):** 298

**Tables:** 4

**Figures:** 3

**References:** 101

1  
2  
3 26 **ABSTRACT**  
4

5 27 **Design and objectives:** Every organisation has a unique culture. There is a widely-held view  
6  
7  
8 28 that a positive organisational culture is related to positive patient outcomes. Following the  
9  
10 29 Preferred Reporting Items for Systematic Review and Meta-Analyses (PRISMA) statement,  
11  
12 30 we systematically reviewed and synthesised the evidence on the extent to which  
13  
14 31 organisational and workplace cultures are associated with patient outcomes.  
15  
16

17 32 **Setting:** A variety of healthcare facilities, including hospitals, general practices, pharmacies,  
18  
19 33 military hospitals, aged care facilities, mental health and other healthcare contexts.  
20  
21

22 34 **Participants:** The articles included were heterogeneous in terms of participants. This was  
23  
24 35 expected as we allowed scope for wide-ranging health contexts to be included in the review.  
25  
26

27 36 **Primary and secondary outcome measures:** Patient outcomes, inclusive of specific  
28  
29 37 outcomes such as pain level, as well as broader outcomes such as patient experience.  
30  
31

32 38 **Results:** The search strategy identified 2,049 relevant articles. A review of abstracts using the  
33  
34 39 inclusion criteria yielded 204 articles eligible for full-text review. Sixty-two articles were  
35  
36 40 included in the final analysis. We assessed studies for risk of bias and quality of evidence.  
37  
38 41 The majority of studies (84%) were from the North America or Europe, and conducted in  
39  
40 42 hospital settings (89%). They were largely quantitative (94%) and cross-sectional (81%). The  
41  
42 43 review identified four interventional studies, and no randomised controlled trials, but many  
43  
44 44 good quality social science studies. We found that overall, positive organisational and  
45  
46 45 workplace cultures were consistently associated with a wide range of patient outcomes such  
47  
48 46 as reduced mortality rates, falls and hospital acquired infections, and increased patient  
49  
50 47 satisfaction.  
51  
52

53  
54 48 **Conclusions:** Synthesised, although there was no level 1 evidence, our review found a  
55  
56 49 consistently positive association held between culture and outcomes across multiple studies,  
57  
58  
59  
60



1  
2  
3 50 settings and countries. This supports the argument in favour of activities which promote  
4  
5 51 positive cultures in order to enhance outcomes in health care organisations.  
6  
7  
8  
9  
10

11 52

### 12 53 **ARTICLE SUMMARY: STRENGTHS AND LIMITATIONS OF THIS STUDY**

- 13  
14 54 • This review found a consistent association between organisational and workplace  
15  
16 55 culture, and patient outcomes across a variety of health settings; most included studies  
17  
18 56 consisted of observational, cross-sectional studies conducted in hospitals.  
19  
20  
21 57 • The high volume of included studies provides a solid foundation for readers to  
22  
23 58 enhance their knowledge of organisational culture in healthcare.  
24  
25 59 • Most articles included in the final synthesis were rated as high quality, based on the  
26  
27 60 Quality Assessment Tool.  
28  
29  
30 61 • The broad scope of the review, including a wide-ranging search strategy, provided an  
31  
32 62 overarching account of the research topic.  
33  
34 63 • Definitions and measurements of culture, environment and patient outcomes were  
35  
36 64 highly variable across studies, which placed limits on the comparisons that could be  
37  
38 65 drawn.  
39  
40  
41  
42  
43  
44  
45  
46  
47  
48  
49  
50  
51  
52  
53  
54  
55  
56  
57  
58  
59  
60

66

1  
2  
3 67 **The association between organisational and workplace cultures, and patient**  
4  
5 68 **outcomes: systematic review**  
6  
7  
8 69

9  
10 70 **INTRODUCTION**  
11

12  
13 71 Amongst policymakers, managers and clinicians, culture is a much-discussed construct. The  
14  
15 72 discourse is often centred on normative considerations, proposing that an effective, functional  
16  
17 73 or productive culture is preferable to one that is ineffective, dysfunctional or even toxic.[1, 2]  
18  
19 74 A healthier organisational or workplace culture is believed to be related to positive patient  
20  
21 75 outcomes, such as reduced mortality and length of stay, increased quality of life and  
22  
23 76 decreased pain level.[3, 4] However, no review has been conducted to weigh the evidence for  
24  
25 77 such beliefs. We examined the extent to which this putative association between culture and  
26  
27 78 patient outcomes holds in healthcare settings.  
28  
29

30  
31 79 Across the literature, culture has been defined in numerous ways.[4-10] Famously,  
32  
33 80 Kroeber and Kluckhohn found 164 definitions of culture in 1952. Since then there are most  
34  
35 81 likely many more variations and definitional stances on the culture theme.[11] It is not easy  
36  
37 82 to synthesise these different perspectives, but most experts would agree that culture signifies  
38  
39 83 features of institutional life which are shared across a workplace or organisation, between the  
40  
41 84 members, such as their cognitive beliefs, assumptions and attitudes; and their activities, such  
42  
43 85 as their behaviours, practices and interactions. These shared ways of thinking and behaving  
44  
45 86 become normalised, and reflect what comes to be seen as legitimate and acceptable within the  
46  
47 87 workplace or organisation. The cultural expressions also become taken for granted by  
48  
49 88 members of the workplace or organisation. They are the normative, social and cognitive  
50  
51 89 ‘glue’ which bind people within the culture together; culture, then, is ‘the way people think  
52  
53 90 around here’ and ‘the way things are done around here’.  
54  
55  
56  
57  
58  
59  
60

1  
2  
3 91 Based on these conceptualisations, we define culture in a summarised way, as the sum  
4  
5 92 of jointly-held characteristics, values, thinking and behaviours of people in workplaces or  
6  
7 93 organisations[4] (for a list of key terms and definitions, see Box 1). For this systematic  
8  
9 94 review, culture is classified in two ways. The first category concerns the *overarching culture*  
10  
11 95 *of an organisation*, including consistent practices, beliefs and attitudes, for example, within a  
12  
13 96 whole hospital, general practice group, aged care facility or other institutional setting.[12, 13]  
14  
15 97 The second category relates to more localised cultural dimensions; *workplace cultures*, which  
16  
17 98 are specific to group characteristics of the organisation, for example those identifiable sub-  
18  
19 99 cultures that manifest in wards, departments, or within employee groups such as doctors,  
20  
21  
22  
23 100 allied health professionals, or nurses.[8, 14, 15]  
24

25  
26 101 These definitions arise from, and are underpinned by, much conceptual work which  
27  
28 102 has enriched the idea of culture and the way it manifests. Theoretically, there are multiple  
29  
30 103 stances taken in conceptualising culture. One way is to think of culture as a composite, and  
31  
32 104 enduring but relatively static phenomenon; a sort of concrete, tangible, matter-of-fact  
33  
34 105 organisational variable. Here, it is a noun: *the culture*. Another way is to think of it as  
35  
36 106 dynamic, emergent, longitudinal phenomenon, more a verb than a noun. This distinction is a  
37  
38 107 deep one, springing from a social science perspective which asks whether phenomenon of  
39  
40 108 this kind are a *being-realism* or a *becoming-realism*. [16]  
41  
42  
43

44 109 Yet another theoretical distinction lies in whether culture is better understood with  
45  
46 110 reference to shared *meanings* or shared *practices*. Scholars including Martin (2002)[17] and  
47  
48 111 Alvesson (2002)[18] see that culture can be construed and understood theoretically in many  
49  
50 112 different ways depending on the observers' interests, ideologies and interpretative or  
51  
52 113 reflexive stance. All in all, theoretically we take the view that culture is a composite, complex  
53  
54 114 construct which changes dynamically over time, but there are enduring behavioural and  
55  
56 115 cognitive patterns to its manifestations *in situ*. [7, 19]  
57  
58  
59  
60

1  
2  
3 116  
4  
56 **Box 1: Definitions**  
7

8 **Cohen's Kappa:** A statistic commonly used to measure interrater reliability; that is, the  
9  
10 extent to which individual raters' scores agree with each other whilst accounting for chance  
11  
12 agreement.[20]  
13

14  
15 **Climate:** Employees' perception of an organisational or workplace culture.[21] Climate and  
16  
17 culture are terms often used interchangeably in the literature, without clear cut  
18  
19 boundaries.[21] For this purpose of this review, the concept of climate is encompassed in the  
20  
21 definition of culture.  
22  
23

24  
25 **Environment:** The structural, social and implicit characteristics of the context in which work  
26  
27 is done.[22] For the purposes of this review, only cultural elements of workplace or  
28  
29 organisational environment were considered, e.g., cooperation and sense of cohesiveness  
30  
31 between the work team. Structural characteristics such as nurse to patient ratios, and  
32  
33 employee characteristics such as education, were not included in our definition of work  
34  
35 environment.  
36  
37

38  
39 **Organisational culture:** The values, behaviours, goals, attitudes, practices, and beliefs  
40  
41 shared across an entire organisation.[23]  
42

43  
44 **Patient outcomes:** The downstream consequences of patient care. These can be positive  
45  
46 (e.g., satisfaction with care, reduced length of stay) or negative (e.g., disability, hospital  
47  
48 acquired infection).[21]  
49

50  
51 **Quality of care:** Within a healthcare environment, there are many facets of quality of care.  
52  
53 Types of care that can be assessed include the technical and judgement skill provided by the  
54  
55 physician, and the interpersonal care received from healthcare professionals.[24]  
56  
57  
58  
59  
60

1  
2  
3 139 **Quality of study:** The extent that the study design and the manner in which it is executed are  
4  
5 140 protective from bias and error.[25]  
6  
7

8 141 **Risk of bias:** The potential for a systematic deviation from facts; an error.[25]  
9

10 142 **Workplace culture:** A specific type of sub-culture involving an identifiable grouping within  
11  
12 143 an organisation. In healthcare, such a 'workplace' may be a unit, ward or department, or a  
13  
14 144 professional group, e.g., medicine or nursing.[26]  
15  
16  
17

18 145  
19

20 146 In this review, we aimed to investigate ways in which organisational and workplace  
21  
22 147 cultures are associated with patient outcomes across a range of healthcare settings. On the  
23  
24 148 basis of the foregoing,[4, 21, 27] we formulated a hypothesis: *positive organisational and*  
25  
26 149 *workplace cultures are related to positive patient outcomes and negative organisational and*  
27  
28 150 *workplace cultures are related to negative patient outcomes.* By positive we mean a  
29  
30 151 cohesive, supportive, collaborative, inclusive culture, and by negative, we mean the converse.  
31  
32 152 We anticipated that this review would provide information for those, such as policymakers,  
33  
34 153 managers, clinicians, researchers, and patient groups who seek to understand, shape or  
35  
36 154 enhance healthcare cultures or sub-cultures. We expected that such an analysis would provide  
37  
38 155 insights into the evidence for culture and sub-cultures, and recognise that cultures are deeply  
39  
40 156 embedded in systems and settings in terms of their interacting agents, capacity to evolve and  
41  
42 157 adapt, and emergent behaviours.[28, 29]  
43  
44  
45  
46  
47

48 158

## 49 159 **METHODS**

50  
51  
52  
53 160 The review was carried out in accordance with the Preferred Reporting Items for Systematic  
54  
55 161 Review and Meta-analyses (PRISMA) statement.[30] A literature search of academic  
56  
57 162 databases CINAHL, EMBASE, Ovid MEDLINE, Web of Science and PsycINFO, of studies  
58  
59  
60

163 published since the inception of the databases, was conducted in August 2016. The search  
 164 strategy consisted of terms pertaining to patient outcomes, inclusive of specific outcomes  
 165 such as decubitus ulcer and pain level, as well as broader terms such as quality of care and  
 166 patient experience (see Table 1 for the search strategy, using Ovid MEDLINE as an  
 167 example). The review was undertaken in accordance with a published study protocol, which  
 168 provides more detailed information regarding information sources, the search strategy, data  
 169 items and data synthesis (Supplementary file A. Published Protocol).[26]

171 **Table 1: Database search strategy: Ovid MEDLINE**

| Constructs                                           | Search terms                                                                                                                                                                                                                                                                                                                                                                                     |
|------------------------------------------------------|--------------------------------------------------------------------------------------------------------------------------------------------------------------------------------------------------------------------------------------------------------------------------------------------------------------------------------------------------------------------------------------------------|
| <b>Organisational culture/<br/>workplace culture</b> | work culture OR work place OR workplace OR work site OR worksite OR organi\$ation* culture OR service culture OR corporate culture OR work climate OR organi\$ation* climate OR service climate OR corporate climate OR work ethos OR organi\$ation* ethos OR service ethos OR corporate ethos OR work environment OR organi\$ation* environment OR service environment OR corporate environment |
| <b>AND</b>                                           |                                                                                                                                                                                                                                                                                                                                                                                                  |
| <b>Patient outcomes</b>                              | patient outcome* OR patient satisfaction OR health outcome* OR patient experience* OR mortality OR length of stay OR pain level OR cost of care OR functional abilit* OR patient knowledge OR quality of life OR impairment* OR disabilit* OR readmission rate* OR adverse event* OR medication error* OR patient fall* OR infection* OR decubitus ulcer*                                        |
| <b>AND</b>                                           |                                                                                                                                                                                                                                                                                                                                                                                                  |
| <b>Health care</b>                                   | health organi\$ation* OR hospital* OR health facilit* OR acute care OR primary care OR health OR healthcare OR health care OR health-care                                                                                                                                                                                                                                                        |

172  
 173 Records and abstracts resulting from the database search were downloaded into an  
 174 EndNote library and duplicates were removed. Pairs of authors (JH:GL; KL:LT) reviewed  
 175 5% of records to ensure the article retention process was consistent. Abstracts were assessed

1  
2  
3 176 against the following inclusion criteria: English language, peer-reviewed journal articles  
4  
5 177 consisting of empirical research conducted in healthcare settings. A broad definition of  
6  
7 178 healthcare was adopted, encompassing settings including hospitals, general practices,  
8  
9 179 pharmacies, military hospitals, aged care facilities, mental health and other healthcare  
10  
11 180 settings. Articles were only included if they assessed the association between organisational  
12  
13 181 or workplace culture, and patient outcomes. Articles that measured safety culture were  
14  
15 182 included if other inclusion criteria were met, as safety culture is an important component of  
16  
17 183 organisational culture.  
18  
19

20  
21 184 Discrepancies in article retention were discussed until a consensus was reached, with  
22  
23 185 JB acting as arbitrator in cases of ambiguous study suitability. JH, KL, GL and LT assessed  
24  
25 186 the remaining abstracts against the inclusion criteria followed by a full-text analysis of  
26  
27 187 included articles. Papers evaluating 'hospital performance' were eligible for inclusion if the  
28  
29 188 measures concerned patient outcomes. Articles referring to measures of process interventions,  
30  
31 189 for example, 'adherence to guidelines' or 'medication administration error reporting' were  
32  
33 190 excluded if they did not measure patient outcomes. Articles that only measured healthcare  
34  
35 191 employees' *perceptions* of patient outcomes were excluded, as they were classified as a  
36  
37 192 process rather than outcome measure. Only associations relevant to the hypothesis were  
38  
39 193 included in the analysis.  
40  
41  
42

43  
44 194 Included articles were summarised using a data extraction sheet (Supplementary File  
45  
46 195 B. Data Extraction Sheet).[31] Key information recorded included country, timeframe of data  
47  
48 196 collection, study type, aims, data collection methods, methodology, findings, and  
49  
50 197 implications. Bias of studies was assessed by JH and JB using a Risk of Bias Template  
51  
52 198 (Supplementary File C. Risk of Bias Template), adapted from the Cochrane Handbook for  
53  
54 199 Systematic Reviews, specifically the Cochrane Collaboration's tool for assessing risk of  
55  
56 200 bias.[32] The quality of articles was assessed by JH, GL, KL, and LT using Hawker et al.'s  
57  
58  
59  
60

1  
2  
3 201 (2002) Quality Assessment Tool.[33] Studies were analysed and synthesised according to  
4  
5 202 direction of association and categorisation of patient outcomes.  
6  
7  
8 203

## 10 204 **RESULTS**

### 13 205 **Search strategy**

16 206 The results of the search strategy are outlined in Figure 1. A total of 2,049 relevant articles  
17  
18 207 were identified. The Cohen's Kappa for the 5% review of abstracts was 0.2966 (JH:GL) and  
19  
20 208 0.5032 (KL:LT). It is noted that Kappa Paradox 1 occurred in this instance, due to the  
21  
22 209 prevalence of excluded articles decreasing the Kappa value.[34, 35] This was taken into  
23  
24 210 account through calculating the prevalence-adjusted bias-adjusted Kappa (PABAK),  
25  
26 211 increasing the values to a strong (0.84) and moderate (0.76) level of agreement,  
27  
28 212 respectively.[20] Additionally, the prevalence index (PI) was calculated as 0.88 and 0.73 for  
29  
30 213 the pairs of reviewers.  
31  
32  
33

34 214 Two hundred and four abstracts met the inclusion criteria based on the complete  
35  
36 215 review of abstracts. The full text content review of these included articles resulted in sixty-  
37  
38 216 two articles included in the final analysis. A comprehensive table of included articles was  
39  
40 217 generated by JH and edited by KL and LT (Supplementary File D. Summary of Included  
41  
42 218 Articles).  
43  
44  
45  
46 219

48 220 **[Insert Figure 1. Search strategy here]**

51 221

### 54 222 **Study characteristics**



223 A summary of included study characteristics is provided in Table 2. The majority of studies  
 224 employed quantitative methods. Only four studies comprised mixed methods, and no study  
 225 involved purely qualitative methods. Most studies were observational in nature, with only  
 226 four intervention studies identified in the final analysis. Of the observational studies, most  
 227 were classified as cross-sectional. Studies were more commonly conducted in a hospital  
 228 context, and a US setting. No studies yielding level one evidence, i.e., randomised controlled  
 229 trials, were identified. The data obtained from the review was heterogeneous, in terms of  
 230 participants and outcomes (clinically diverse), and in study design (methodologically  
 231 diverse).[36] Across the studies, organisational and workplace culture and environment were  
 232 defined and measured in a non-standardised way. For example, some studies focussed on  
 233 broader hospital culture,[37-45] while others assessed staff attitudes and values,[46-49] or  
 234 safety climate.[50-60] The concept of patient outcomes was also diverse in nature,  
 235 comprising a variety of specific and broader outcomes and conditions. Due to the  
 236 heterogeneity of definitions, tools, and variables, quantitative meta-analysis of data was of no  
 237 value.[61]

239 **Table 2. Descriptive characteristics of included studies**

|                          | Number<br>(%) |
|--------------------------|---------------|
| <b>Method</b>            |               |
| Quantitative             | 58 (93.6)     |
| Qualitative              | 0 (0.0)       |
| Mixed                    | 4 (6.5)       |
| <b>Study design</b>      |               |
| Intervention             | 4 (6.5)       |
| Observational            | 58 (93.6)     |
| Cross-sectional          | 50 (80.7)     |
| Longitudinal             | 10 (16.1)     |
| <b>Level of Evidence</b> |               |
| Level 1                  | 0 (0.0)       |
| Other                    | 62 (100.0)    |

| <b>Setting</b> |           |
|----------------|-----------|
| Hospital       | 55 (88.7) |
| Aged care      | 4 (6.5)   |
| Other          | 3 (4.8)   |
| <b>Country</b> |           |
| USA            | 36 (58.1) |
| Europe         | 11 (17.7) |
| Canada         | 5 (8.1)   |
| Asia           | 4 (6.5)   |
| Australia      | 2 (3.2)   |
| Middle East    | 2 (3.2)   |
| UK             | 2 (3.2)   |

240

241 **Risk of bias**

242 The Cochrane Collaboration's tool for assessing risk of bias is designed for use in clinical  
 243 trials. Our final collection of articles did not contain data from clinical trials, and therefore,  
 244 the tool was deemed an inappropriate method by which to assess risk of bias. A new way of  
 245 assessing risk of bias was established (Supplementary File C) by adapting the Cochrane  
 246 Handbook for Systematic Reviews' definitions of bias for applicability to quantitative and  
 247 qualitative non-intervention studies.[32] Applying this tool, it was clear that all included  
 248 articles sustained a risk of bias. It is suggested that classification of articles by quality, rather  
 249 than exclusively by bias, is more appropriate for this class of review.

250

251 **Quality assessment**

252 Over 93% of included studies were observational (Table 2). The Cochrane Handbook for  
 253 Systematic Reviews suggests that observational studies rate as low quality in its Grades of  
 254 Recommendation, Assessment, Development and Evaluation (GRADE) approach to  
 255 assessing the quality of articles.[62] Hawker et al.'s (2002) Quality Assessment Tool[33] was  
 256 deemed more suitable for this review as it is designed to evaluate studies covering a variety  
 257 of research paradigms. The tool developers (Hawker et al., 2002) gave detailed descriptions

258 of what constituted a “good” (4 points), “fair” (3 points), “poor” (2 points) or “very poor” (1  
 259 point) article in each of the following nine categories: abstract and title; introduction and  
 260 aims; method and data; sampling; data analysis; ethics and bias; findings/results;  
 261 transferability/generalisability; and, implications and usefulness, allowing for a potential  
 262 maximum score of 36. Hawker et al. (2002) did not suggest cut-offs for classifying the total  
 263 quality rating of the article, but this has been proposed by other researchers using the Quality  
 264 Assessment Tool.[33] For example, the rule of thumb developed by Lorenc et al. (2014)  
 265 suggests the following quality grading system: “high quality” (30-36 points), “medium  
 266 quality” (24-29 points), and “low quality” (9-24 points).[63] This recommendation was  
 267 modified in the current systematic review where “low quality” was classified as 9-23 points  
 268 to reduce ambiguity. Quality scores ranged from 17-36 across the 62 included studies. Full  
 269 details on quality scores are provided in Table 3. Articles were classified as either high,  
 270 medium or low quality based on these cut-off values. Quality scores are reported in  
 271 Supplementary File D.

272

273 **Table 3. Methodological rigour and quality of included articles**

| Quality classification* | Points scored on the Hawker et al. (2002) Quality Assessment Tool* | Number of articles classified in each section |
|-------------------------|--------------------------------------------------------------------|-----------------------------------------------|
| High quality            | 30-36                                                              | 39                                            |
| Medium quality          | 24-29                                                              | 21                                            |
| Low quality             | 9-23                                                               | 2                                             |

274 \*adapted from cut-off values determined by Lorenc et al., 2014.[63]

275

## 276 Overall findings

277 We found that organisational and workplace cultures were correlated with patient outcomes  
 278 in over 90% of studies. The majority (74.2%) of associations were classified as ‘positive’,

1  
2  
3 279 comprising of exclusively positive associations (48.4%), or a mixture of positive associations  
4  
5 280 and no associations in articles reporting multiple studies (25.8%) (Figure 2).  
6  
7  
8  
9

10  
11 281

12  
13 282 **[Insert Figure 2: Categorisation of direction of studies (number of studies) here]**  
14  
15

16  
17 283

18 284 Culture was positively associated with a range of system-related patient outcomes.  
19 285 These comprised four broad, systems-based outcomes: mortality rates,[54, 55, 64-70] failure  
20 286 to rescue,[64, 66, 71] readmission rates,[51, 58, 72, 73] and adverse events/medication  
21 287 errors.[39, 56, 57, 74-77] They also included wellbeing outcomes, notably, patient  
22 288 satisfaction,[38, 40, 42, 44, 47, 48, 78-87] quality of life,[88] and patient mood.[88] More  
23 289 specific clinical outcomes related to culture were pressure ulcers,[39, 53, 89-92] falls,[37, 39,  
24 290 53, 77, 90, 93] hospital acquired infections,[39, 46, 50, 91, 94-96] depressive symptoms,[97]  
25 291 pulmonary embolism/deep vein thrombosis,[53] incontinence,[92] symptom burden at the  
26 292 end of life,[67] and physical and mental health status[59] (Figure 3). Table 4 summarises all  
27 293 associations by outcome type. It should be noted that one of the articles that measured  
28 294 hospital acquired infections as the outcome was low quality according to the Quality  
29 295 Assessment Tool, and only a handful were interventional or had a control group. However,  
30 296 this is not of primary importance in light of the plethora of higher-quality studies yielding a  
31 297 positive result.  
32  
33  
34  
35  
36  
37  
38  
39  
40  
41  
42  
43  
44  
45  
46

47 298 Articles showing no significant associations accounted for 8.1% of studies.  
48 299 Indeterminate or results comprising both positive and negative associations, made up 19.4%  
49 300 of the research. There were no studies presenting 'negative' associations (exclusively  
50 301 negative associations, or negative associations and no associations).  
51  
52  
53  
54  
55  
56  
57  
58  
59  
60

302

303 **[Insert Figure 3: Key associations between culture and patient outcomes here]**

304

305 **Table 4. Associations by type of outcome**

|                                           | <b>System-related patient outcomes</b> | <b>Wellbeing outcomes</b> | <b>Clinical outcomes</b> |
|-------------------------------------------|----------------------------------------|---------------------------|--------------------------|
| Exclusively positive associations         | 15 (24.2)                              | 13 (21.0)                 | 5 (8.1)                  |
| Positive associations and no associations | 8 (12.9)                               | 6 (9.7)                   | 8 (12.9)                 |
| No associations                           | 2 (3.2)                                | 3 (4.8)                   | 1 (1.6)                  |
| Negative associations and no associations | 0 (0.0)                                | 0 (0.0)                   | 0 (0.0)                  |
| Exclusively negative associations         | 0 (0.0)                                | 0 (0.0)                   | 0 (0.0)                  |
| Indeterminate or mixed results            | 8 (12.9)                               | 4 (6.5)                   | 5 (8.1)                  |

306

307 **Positive associations**

308 Almost three in four (74.2%) studies reported exclusively positive associations, or a mixture  
 309 of positive associations and no associations, between culture and patient outcomes. For  
 310 example, hospital-based cross-sectional studies found patient mortality rates were nearly 48%  
 311 lower in hospitals with better work environments,[69] and surgical mortality rates were more  
 312 than 60% higher in hospitals with poor work environments.[98] Some studies moved beyond  
 313 ‘better’ and ‘poor’ environments by evaluating *types* of culture positively associated with  
 314 patient outcomes. For example, a ‘human relations’-type culture was also related to enhanced  
 315 patient satisfaction.[40] Human relations involved focusing on flexibility and supporting  
 316 internal resources, and embracing values associated with belonging, trust, and cohesion.

317 Organisations and workplace cultures were also positively associated with patient  
 318 outcomes in contexts other than hospitals. A study of aged-care found that residents in

1  
2  
3 319 facilities with less effective staff cohesion were at significantly greater risk of pressure ulcers  
4  
5 320 and incontinence, compared with residents in facilities with more effective cohesion.[92]  
6  
7 321 Depressive symptoms in residents were associated with two dimensions of organisational  
8  
9 322 culture (proficiency and resistance), and three dimensions of climate (stress, engagement, and  
10  
11 323 functionality).[97] Companionate love culture (that is, feelings of affection, caring and  
12  
13 324 compassion) in aged-care facilities was positively correlated with patient mood, quality of  
14  
15 325 life, satisfaction and fewer trips to the emergency room.[88] A single study of a community  
16  
17 326 mental health organisation concluded that a positive organisational culture was a strong  
18  
19 327 predictor of physical and mental health status improvements over time, but not changes in  
20  
21 328 quality of life.[59] These findings collectively indicate the importance of a positive  
22  
23 329 organisational and workplace culture for a wide variety of patient outcomes, across multiple  
24  
25 330 settings.

26  
27  
28  
29  
30 331 A small group of articles reported a combination of positive associations and no  
31  
32 332 associations between culture and patient outcomes. One paper found no correlation between  
33  
34 333 culture or climate and risk-adjusted outcomes, however, teamwork, communication and  
35  
36 334 collaboration was associated with risk-adjusted morbidity.[54] Another paper found that  
37  
38 335 nurses' perceptions of work environment were significantly related to patient hospitalisation  
39  
40 336 rates, but not with patient satisfaction.[99] Studies that reported mixed positive and no-  
41  
42 337 association results have also been reported in aged care[57, 88] and mental health  
43  
44 338 services.[59]

45  
46  
47  
48 339

#### 49 50 51 340 **No associations**

52  
53  
54 341 Not all studies reported associations between culture and patient outcomes. A primary care-  
55  
56 342 based cross-sectional study found no significant associations between team culture and

1  
2  
3 343 HbA1c level, systolic blood pressure and total cholesterol levels in diabetes mellitus type II  
4  
5 344 patients.[49] Other studies, one of which was ranked as low-quality, found no association  
6  
7 345 between organisational or workplace culture and patient satisfaction,[52] performance  
8  
9 346 indexes,[41] prescription errors, rates of adverse events, and patient mortality rates.[100]  
10  
11  
12

13 347

### 14 348 **Indeterminate studies**

15  
16  
17 349 Over 17% of included articles reported indeterminate or mixed results. The ‘indeterminate’  
18  
19 350 category was used in cases where the classification of cultures as positive or negative could  
20  
21 351 not be discerned. For example, higher scores on group culture measures, that is those that  
22  
23 352 emphasised teamwork, cohesiveness and participation, were associated with significantly  
24  
25 353 lower rates of survival without major morbidity, whereas in one study, higher scores on  
26  
27 354 hierarchical culture measures were associated with higher rates of survival without major  
28  
29 355 morbidity.[70] ‘Mixed’ refers to both positive and negative associations presented in the one  
30  
31 356 paper. A study reported that ICUs in which nurses perceived the culture as positive had  
32  
33 357 higher rates of central line associated bloodstream infections (CLBSI), but were 39% less  
34  
35 358 likely to develop a catheter-associated urinary tract infection (CAUTI).[91] In another study  
36  
37 359 with a relatively small sample size, patient falls with injury were positively related to a  
38  
39 360 developmental culture. A developmental culture was one characterised by dynamic and  
40  
41 361 innovative environments that value individual initiatives and growth. Patient falls with injury  
42  
43 362 were negatively related to group culture, characterised by warm, caring environments that  
44  
45 363 value tradition and loyalty.[37]  
46  
47  
48  
49  
50

51 364

### 52 365 **Intervention studies**

1  
2  
3 366 Our review included four intervention studies. A systematic review on culture and  
4  
5 367 performance (rather than outcomes) completed in 2011, included only two interventions.[4]  
6  
7 368 A study in rural/small hospitals which implemented 12 nurse-friendly criteria to create a  
8  
9 369 positive work environment observed positive changes in nurses' perception of their work  
10  
11 370 environment and improvements in quality of care in participating hospitals post-  
12  
13 371 intervention.[90] A hospital-based intervention study to change organisational culture on  
14  
15 372 frequency of staff handwashing did not improve rates of methicillin-resistant Staphylococcus  
16  
17 373 aureus (MRSA) in two hospitals, but rates of vancomycin-resistant enterococci (VRE) were  
18  
19 374 significantly reduced in the intervention hospital during implementation.[94] A prominent  
20  
21 375 interventional study, the UK Safer Patients Initiative, indicated that while there was a small  
22  
23 376 improvement in staff attitudes to organisational climate in intervention hospitals, the  
24  
25 377 intervention had no significant effect on patient safety outcomes, measured by the proportion  
26  
27 378 of prescription errors, rates of adverse events, and mortality rates.[100] The fourth  
28  
29 379 intervention study was based in a single hospital in Sweden. The study found that patients'  
30  
31 380 perceptions of work environment were a significant predictor of patients' satisfaction with  
32  
33 381 quality of care.[78]  
34  
35  
36  
37  
38  
39  
40  
41  
42

## 383 **DISCUSSION**

43  
44 384 We synthesised a large literature with diverse variables which attempted to measure or study  
45  
46 385 healthcare cultures, or intervene to create enhanced organisational and workplace cultures.  
47  
48 386 Research was conducted across multiple healthcare settings, mostly hospitals, in a range of  
49  
50 387 countries, chiefly north America, Europe and Australasia. The complexity of the synthesising  
51  
52 388 task should not be underestimated in reviews of this kind (see also Greenhalgh's work  
53  
54 389 synthesising research on diffusion of innovation[101]). The studies we report on undertook  
55  
56 390 work in complex systems and settings in which care is provided by a layered web of agents  
57  
58  
59  
60



1  
2  
3 391 interacting dynamically across space and time, producing emergent outcomes.[28, 29]  
4  
5 392 Cultures in such settings are hard to change, and resist simple, linear improvement strategies.  
6  
7 393 The studies themselves involved nuanced choices in types of measures, multiple mechanisms  
8  
9 394 for studying culture or intervening to improve it, and variable ways of reporting their  
10  
11 395 methods and results.

14 396 Despite the challenges in combining and assessing disparate research, we found  
15  
16 397 confirmatory evidence for previous work,[4, 21, 27] which suggested that there were positive  
17  
18 398 linkages between cultures in healthcare settings and patient outcomes. In short, healthcare  
19  
20 399 organisational and workplace cultures are related to patient outcomes in the way people have  
21  
22 400 generally assumed they are, and in the positive direction our hypothesis suggested. Thus, we  
23  
24 401 found sufficient evidence to support our hypothesis that there are ubiquitous links between  
25  
26 402 our two culture types across multiple studies. In summary, positive cultures are consistently  
27  
28 403 linked in many studies to better patient outcomes.

32 404

#### 35 405 **Study strengths and weaknesses**

38 406 The number of included articles in this review compared to systematic reviews on other  
39  
40 407 topics was relatively high, providing comprehensive coverage of the research topic. An  
41  
42 408 overarching account of the association between organisational and workplace culture and  
43  
44 409 patient outcomes was made possible by having a broad scope of review, including multiple  
45  
46 410 types of healthcare settings, and considering patient outcomes as both an all-encompassing  
47  
48 411 concept as well as considering more specific outcomes. However, the broad scope poses a  
49  
50 412 challenge, as there were inherent limitations whereby our core term, culture, was  
51  
52 413 inconsistently defined or measured in the studies we reviewed. The heterogeneity of data  
53  
54 414 complicated attempts to draw precise comparisons across studies, and conclusions.

1  
2  
3 415 Nevertheless, we rigorously assessed bias and study quality, and the study results point in the  
4  
5 416 same direction. It is important to note, notwithstanding our consistent result, that this review  
6  
7 417 might be limited by the inherent risk of bias across studies, such as publication bias whereby  
8  
9 418 studies reporting significant results may be viewed more favourably for publication than  
10  
11 419 those that do not.

14 420 Both types of culture—organisational, and workplace culture—were considered in  
15  
16 421 this review. As Figure 2 shows, the majority of studies used hybrid measures of culture in  
17  
18 422 which both organisational culture and workplace culture were examined, or the type of  
19  
20 423 culture assessed was not clearly defined. Therefore, conclusions could not be drawn on  
21  
22 424 whether organisational or workplace culture, taken individually, were more strongly  
23  
24 425 associated to positive patient outcomes.

28 426 Our review aimed to consider and discuss articles across a variety of health settings,  
29  
30 427 but most included studies were conducted in a hospital environment. We propose that more  
31  
32 428 research is needed in other healthcare settings such as aged and community care. Only four  
33  
34 429 studies employed interventional designs in testing out chosen associations, but many studies  
35  
36 430 are high quality social science articles. More rigorous intervention studies aimed at  
37  
38 431 promoting change in organisational culture could provide valuable information on how  
39  
40 432 improvements in organisational culture can affect outcomes for patients.

44 433

## 47 434 **CONCLUSION**

49 435 Studies examining culture are common. Fewer explore linkages between cultures and patient  
50  
51 436 outcomes. There are no RCTs, and few intervention studies with strong designs are reported.  
52  
53 437 The consistent trend for most studies is to find that positive cultures are related to better  
54  
55  
56  
57  
58  
59  
60

1  
2  
3 438 outcomes for patients. Better quality studies, and those outside of hospitals, would provide  
4  
5 439 confirming or disconfirming evidence for our synthesis.  
6  
7

8 440

9  
10 441 **Acknowledgements**

11  
12 442 The authors would like to record our appreciation to Jeremy Cullis, Clinical Librarian,  
13  
14 443 Macquarie University, for proving his expertise on the use of academic databases and for  
15  
16 444 reviewing our search strategy. We also thank Ms Hsuen P. Ting, Biostatistician, Australian  
17  
18 445 Institute of Health Innovation, Macquarie University, for providing advice, and conducting  
19  
20 446 the statistical analysis of the 5% library analyses. Thanks also to Ms Elise McPherson,  
21  
22 447 Research Assistant, Australian Institute of Health Innovation, Macquarie University, for  
23  
24 448 providing word processing and logistical support.  
25  
26  
27  
28

29 449

30  
31  
32 450 **Competing Interests**

33  
34 451 The authors declare no conflicts of interest.  
35  
36  
37

38 452

39  
40 453 **Funding**

41  
42 454 This work is supported by NHMRC Program Grant 1054146, NHMRC Partnership Centre in  
43  
44 455 Health Systems Sustainability Grant 9100002, and other grants held by JB.  
45  
46  
47

48 456

49  
50 457 **Data Sharing Statement**

51  
52 458 No additional data available.  
53  
54  
55

56 459  
57  
58  
59  
60

1  
2  
3 460 **Authors' Contributions**  
4

5 461 JB led the study and provided a conceptualisation of the topic to the team, and acted as an  
6  
7 462 arbitrator and advisor where necessary. JH, KL, GL and LT did the abstract and full-text  
8  
9 463 reviews of the articles. All authors contributed to the writing of the drafts, and agree with the  
10  
11 464 final version.  
12  
13

14  
15 465

16  
17  
18 466 **Amendments**  
19

20 467 Any minor adjustments to the protocol have been documented in this systematic review.  
21  
22  
23  
24  
25  
26  
27  
28  
29  
30  
31  
32  
33  
34  
35  
36  
37  
38  
39  
40  
41  
42  
43  
44  
45  
46  
47  
48  
49  
50  
51  
52  
53  
54  
55  
56  
57  
58  
59  
60

468 **REFERENCES**

- 469 1. Napier AD, Ancarno C, Butler B, Calabrese J, Chater A, Chatterjee H, Guesnet F, Horne  
470 R, Jacyna S, Jadhav S, Macdonald A, Neuendorf U, Parkhurst A, Reynolds R,  
471 Scambler G, Shamdasani S, Smith SZ, Stougaard-Nielsen J, Thomson L, Tyler N,  
472 Volkmann A-M, Walker T, Watson J, de C Williams AC., Willott C, Wilson J, Woolf  
473 K. Culture and health. *Lancet* 2014;384(9954):1607-39.
- 474 2. Smircich L. Concepts of culture and organizational analysis. *Admin Sci Q* 1983;28(3):339-  
475 58.
- 476 3. Hesselink G, Vernooij-Dassen M, Pijnenborg L, Barach P, Gademan P, Dudzik-Urbaniak  
477 E, Flink M, Orrego C, Toccafondi G, Johnson JK, Schoonhoven L, Wollersheim H,  
478 European HANDOVER Research Collaborative. Organizational culture: an important  
479 context for addressing and improving hospital to community patient discharge. *Med*  
480 *Care* 2013;51:90-98.
- 481 4. Parmelli E, Flodgren G, Beyer F, Baillie N, Schaafsma ME, Eccles MP. The effectiveness  
482 of strategies to change organisational culture to improve healthcare performance: a  
483 systematic review. *Implement Sci* 2011;6(1):1-8.
- 484 5. Scott T, Mannion R, Davies H, Marshall M. The quantitative measurement of  
485 organizational culture in health care: a review of the available instruments. *Health*  
486 *Serv Res* 2003;38(3):923-45.
- 487 6. Mannion R, Davies H, Marshall M. *Cultures for Performance in Health Care*.  
488 Buckingham, UK: Open University Press 2005.
- 489 7. Braithwaite J, Westbrook MT, Iedema R, Mallock NA, Forsyth R, Zhang K. A tale of two  
490 hospitals: assessing cultural landscapes and compositions. *Soc Sci Med*  
491 2005;60(5):1149-62.

- 1  
2  
3 492 8. Braithwaite J, Hyde P, Pope C. *Culture and Climate in Health Care Organizations*.  
4  
5 493 Basingstoke, London, UK: Palgrave Macmillan 2010.  
6  
7 494 9. Braithwaite J. A lasting legacy from Tony Blair? NHS culture change. *J R Soc Med*  
8  
9 495 2011;104(2):87-89.  
10  
11 496 10. Schein E. *Organizational Culture and Leadership*. San Francisco, CA: Jossey-Bass 2004.  
12  
13 497 11. Kroeber AL, Kluckhohn C. *Culture: A Critical Review of Concepts and Definitions*.  
14  
15 498 Cambridge, MA: Peabody Museum of American Archaeology and Ethnology,  
16  
17 499 Harvard University 1952.  
18  
19 500 12. Wagner C, Mannion R, Hammer A, Groene O, Arah OA, Dersarkissian M, Suñol R,  
20  
21 501 DUQuE Project Consortium. The associations between organizational culture,  
22  
23 502 organizational structure and quality management in European hospitals. *Int J Qual*  
24  
25 503 *Health Care* 2014;26(Suppl 1):74-80.  
26  
27 504 13. Ashkanasy NM, Wilderom CPM, Peterson MF. *Handbook of Organizational Culture and*  
28  
29 505 *Climate*. Thousand Oaks, CA: Sage 2000.  
30  
31 506 14. Jacobs R, Mannion R, Davies HT, Harrison S, Konteh F, Walshe K. The relationship  
32  
33 507 between organisational culture and performance in acute hospitals. *Soc Sci Med*  
34  
35 508 2013;76:115-25.  
36  
37 509 15. Callen J, Braithwaite J, Westbrook JI. The importance of medical and nursing sub-  
38  
39 510 cultures in the implementation of clinical information systems. *Methods Inf Med*  
40  
41 511 2009;48(2):196-202.  
42  
43 512 16. Chia R. The problem of reflexivity in organizational research: towards a postmodern  
44  
45 513 science of organization. *Organization* 1996;3(1):31-59.  
46  
47 514 17. Martin J. *Organizational Culture: Mapping the Terrain*. Thousand Oaks, CA: Sage  
48  
49 515 Publications 2002.  
50  
51  
52  
53  
54  
55  
56  
57  
58  
59  
60

- 1  
2  
3 516 18. Alvesson M. *Understanding Organizational Culture*. London, UK: Sage Publications  
4  
5 517 2002.  
6  
7 518 19. Braithwaite J, Mannion R. Managing change. In: Walshe K, Smith J, editors. *Healthcare*  
8  
9 519 *Management, 2nd Edition*. London, UK: Open University Press, 2011: 429-51.  
10  
11 520 20. McHugh ML. Interrater reliability: the kappa statistic. *Biochemia Medica*  
12  
13 521 2012;22(3):276-82.  
14  
15 522 21. MacDavitt K, Chou SS, Stone PW. Organizational climate and health care outcomes. *Jt*  
16  
17 523 *Comm J Qual Patient Saf* 2007;33(11 Suppl):45-56.  
18  
19 524 22. Gershon RRM, Stone PW, Zeltseri M, Faucett J, Macdavitti K, Chou SS. Organizational  
20  
21 525 climate and nurse health outcomes in the United States: a systematic review. *Ind*  
22  
23 526 *Health* 2007;45(5):622-36.  
24  
25 527 23. Scott T, Mannion R, Davies HT, Marshall MN. Implementing culture change in health  
26  
27 528 care: theory and practice. *Int J Qual Health Care* 2003;15(2):111-8.  
28  
29 529 24. Donabedian A. The quality of care. How can it be assessed? *JAMA* 1988;260(12):1743-8.  
30  
31 530 25. Viswanathan M, Ansari MT, Berkman ND, Chang S, Hartling L, McPheeters LM,  
32  
33 531 Santaguida PL, Shamliyan T, Singh K, Tsertsvadze A, Treadwell JR. Assessing the  
34  
35 532 Risk of Bias of Individual Studies in Systematic Reviews of Health Care Intervention.  
36  
37 533 Rockville, MD: Agency for Healthcare Research and Quality Methods Guide for  
38  
39 534 Comparative Effectiveness Reviews, 2012.  
40  
41 535 26. Braithwaite J, Herkes J, Ludlow K, Lamprell G, Testa L. The association between  
42  
43 536 organisational and workplace cultures, and patient outcomes: systematic review  
44  
45 537 protocol. *BMJ Open* 2016;6(12):e013758.  
46  
47 538 27. Scott T, Mannion R, Marshall M, Davies H. Does organisational culture influence health  
48  
49 539 care performance? A review of the evidence. *J Health Serv Res Policy* 2003;8(2):105-  
50  
51 540 17.  
52  
53  
54  
55  
56  
57  
58  
59  
60

- 1  
2  
3 541 28. Plsek PE, Greenhalgh T. The challenge of complexity in health care. *BMJ* 2001;323:625-  
4  
5 542 28.  
6  
7 543 29. Braithwaite J, Clay-Williams R, Nugus P, Plumb J. Health care as a complex adaptive  
8  
9 544 system. In: Hollbagel E, Braithwaite J, Wears R, editors. *Resilient Health Care*.  
10 545 Farnham, Surrey, UK: Ashgate Publishing Ltd, 2013: 57-73.  
11  
12 546 30. Shamseer L, Moher D, Clarke M, Ghersi D, Liberati A, Petticrew M, Shekelle P, Stewart  
13 547 LA. Preferred reporting items for systematic review and meta-analysis protocols  
14 548 (PRISMA-P) 2015: elaboration and explanation. *BMJ* 2015;349:g7647.  
15  
16 549 31. Taylor N, Clay-Williams R, Hogden E, Braithwaite J, Groene O. High performing  
17 550 hospitals: a qualitative systematic review of associated factors and practical strategies  
18 551 for improvement. *BMC Health Serv Res* 2015;15:244.  
19  
20 552 32. Higgins JPT, Altman DG, Sterne JAC. Chapter 8. Assessing risk of bias in included  
21 553 studies. The Cochrane Collaboration. 2011. Available from:  
22 554 [www.handbook.cochrane.org](http://www.handbook.cochrane.org)  
23  
24 555 33. Hawker S, Payne S, Kerr C, Hardey M, Powell J. Appraising the evidence: reviewing  
25 556 disparate data systematically. *Qual Health Res* 2002;12(9):1284-99.  
26  
27 557 34. Byrt T, Bishop J, Carlin JB. Bias, prevalence and kappa. *J Clin Epidemiol*  
28 558 1993;46(5):423-29.  
29  
30 559 35. Feinstein AR, Cicchetti DV. High agreement but low kappa: the problems of two  
31 560 paradoxes. *J Clin Epidemiol* 1990;43:543-48.  
32  
33 561 36. Deeks JJ, Higgins JPT, Altman DG. Chapter 9: What is heterogeneity? The Cochrane  
34 562 Collaboration. 2011. Available from: [www.handbook.cochrane.org](http://www.handbook.cochrane.org)  
35  
36 563 37. Brewer BB. Relationships among teams, culture, safety, and cost outcomes. *West J Nurs*  
37 564 *Res* 2006;28(6):641-53.  
38  
39  
40  
41  
42  
43  
44  
45  
46  
47  
48  
49  
50  
51  
52  
53  
54  
55  
56  
57  
58  
59  
60



- 1  
2  
3 565 38. Coustasse A, Mains DA, Lykens K, Lurie SG, Trevino F. Organizational culture in a  
4  
5 566 terminally ill hospital. *J Hosp Mark Public Relations* 2008;18(1):39-60.  
6  
7 567 39. Dubois C-A, d'Amour D, Tchouaket E, Clarke S, Rivard M, Blais R. Associations of  
8  
9 568 patient safety outcomes with models of nursing care organization at unit level in  
10  
11 569 hospitals. *Int J Qual Health Care* 2013;25(2):110-17.  
12  
13 570 40. Ancarani A, Di Mauro C, Giammanco MD. Patient satisfaction, managers' climate  
14  
15 571 orientation and organizational climate. *Int J Health Policy Manag* 2011;31(3):224-50.  
16  
17 572 41. Nasirpour AA, Gohari MR, Moradi S. The relationship of centralization, organizational  
18  
19 573 culture and performance indexes in teaching hospitals affiliated to tehran university of  
20  
21 574 medical sciences. *Acta Medica Iranica* 2010;48(5):326-31.  
22  
23 575 42. Nowinski CJ, Becker SM, Reynolds KS, Beaumont JL, Caprini CA, Hahn EA, Peres A,  
24  
25 576 Arnold BJ. The impact of converting to an electronic health record on organizational  
26  
27 577 culture and quality improvement. *Int J Med Inform* 2007;76(Suppl 1):174-83.  
28  
29 578 43. Shortell SM, Jones RH, Rademaker AW, Gillies RR, Dranove DS, Hughes EFX, Budetti  
30  
31 579 PP, Reynolds KSE, Huang CF. Assessing the impact of total quality management and  
32  
33 580 organizational culture on multiple outcomes of care for coronary artery bypass graft  
34  
35 581 surgery patients. *Med Care* 2000;38(2):207-17.  
36  
37 582 44. Zhou P, Bundorf K, Le Chang J, Huang JX, Xue D. Organizational culture and its  
38  
39 583 relationship with hospital performance in public hospitals in China. *Health Serv Res*  
40  
41 584 2011;46(6 Pt 2):2139-60.  
42  
43 585 45. Maben J, Adams M, Peccei R, Murrells T, Robert G. 'Poppets and parcels': the links  
44  
45 586 between staff experience of work and acutely ill older peoples' experience of hospital  
46  
47 587 care. *Int J Older People Nurs* 2012;7(2):83-94.  
48  
49 588 46. Fedorowsky R, Peles-Bortz A, Masarwa S, Liberman D, Rubinovitch B, Lipkin V.  
50  
51 589 Carbapenem-resistant Enterobacteriaceae carriers in acute care hospitals and  
52  
53  
54  
55  
56  
57  
58  
59  
60

- 1  
2  
3 590 postacute-care facilities: the effect of organizational culture on staff attitudes,  
4  
5 591 knowledge, practices, and infection acquisition rates. *Am J Infect Control*  
6  
7 592 2015;43(9):935-39.
- 8  
9  
10 593 47. Saame I, Reino A, Vadi M. Organizational culture based on the example of an Estonian  
11  
12 594 hospital. *J Health Organ Manag* 2011;25(5):526-48.
- 13  
14 595 48. Ancarani A, Di Mauro C, Giammanco MD. How are organisational climate models and  
15  
16 596 patient satisfaction related? A competing value framework approach. *Soc Sci Med*  
17  
18 597 2009;69(12):1813-8.
- 19  
20  
21 598 49. Bosch M, Dijkstra R, Wensing M, van der Weijden T, Grol R. Organizational culture,  
22  
23 599 team climate and diabetes care in small office-based practices. *BMC Health Serv Res*  
24  
25 600 2008;8:180.
- 26  
27  
28 601 50. Fan CJ, Pawlik TM, Daniels T, Vernon N, Banks K, Westby P, Wick EC, Sexton JB,  
29  
30 602 Makary MA. Association of safety culture with surgical site infection outcomes. *J Am*  
31  
32 603 *Coll Surg* 2016;222(2):122-28.
- 33  
34 604 51. Hansen LO, Williams MV, Singer SJ. Perceptions of hospital safety climate and  
35  
36 605 incidence of readmission. *Health Serv Res* 2011;46(2):596-616.
- 37  
38  
39 606 52. Ausserhofer D, Schubert M, Desmedt M, Blegen MA, De Geest S, Schwendimann R. The  
40  
41 607 association of patient safety climate and nurse-related organizational factors with  
42  
43 608 selected patient outcomes: a cross-sectional survey. *Int J Nurs Stud* 2013;50(2):240-  
44  
45 609 52.
- 46  
47  
48 610 53. Taylor JA, Dominici F, Agnew J, Gerwin D, Morlock L, Miller MR. Do nurse and patient  
49  
50 611 injuries share common antecedents? An analysis of associations with safety climate  
51  
52 612 and working conditions. *BMJ Qual Saf* 2012;21(2):101-11.
- 53  
54 613 54. Davenport DL, Henderson WG, Mosca CL, Khuri SF, Mentzer RM. Risk-adjusted  
55  
56 614 morbidity in teaching hospitals correlates with reported levels of communication and  
57  
58  
59  
60

- 1  
2  
3 615 collaboration on surgical teams but not with scale measures of teamwork climate,  
4  
5 616 safety climate, or working conditions. *JACS* 2007;205(6):778-84.  
6  
7 617 55. Kelly DM, Kutney-Lee A, McHugh MD, Sloane DM, Aiken LH. Impact of critical care  
8  
9 618 nursing on 30-day mortality of mechanically ventilated older adults. *Crit Care Med*  
10  
11 619 2014;42(5):1089-95.  
12  
13 620 56. Mardon R. E., Khanna K., Sorra J., Dyer N., Famolaro T. Exploring relationships  
14  
15 621 between hospital patient safety culture and adverse events. *J Patient Saf*  
16  
17 622 2010;6(4):226-32.  
18  
19 623 57. Singer S, Lin S, Falwell A, Gaba D, Baker L. Relationship of safety climate and safety  
20  
21 624 performance in hospitals. *Health Serv Res* 2009;44(2 Pt 1):399-421.  
22  
23 625 58. Ma C, McHugh MD, Aiken LH. Organization of hospital nursing and 30-day  
24  
25 626 readmissions in Medicare patients undergoing surgery. *Med Care* 2015;53(1):65-70.  
26  
27 627 59. Morris A, Bloom JR, Kang S. Organizational and individual factors affecting consumer  
28  
29 628 outcomes of care in mental health services. *Adm Policy Ment Health* 2007;34(3):243-  
30  
31 629 53.  
32  
33 630 60. Kutney-Lee A, Stimpfel AW, Sloane DM, Cimiotti JP, Quinn LW, Aiken LH. Changes in  
34  
35 631 patient and nurse outcomes associated with magnet hospital recognition. *Med Care*  
36  
37 632 2015;53(6):550-57.  
38  
39 633 61. Haidich AB. Meta-analysis in medical research. *Hippokratia* 2010;14(Suppl 1):29-37.  
40  
41 634 62. Schünemann HJ, Oxman AD, Vist GE, Higgins JPT, Deeks JJ, Glasziou P, Guyatt GH.  
42  
43 635 Chapter 12: Interpreting results and drawing conclusions. The Cochrane  
44  
45 636 Collaboration. 2011. Available from: [www.handbook.cochrane.org](http://www.handbook.cochrane.org)  
46  
47  
48  
49  
50  
51 637 63. Lorenc T, Petticrew M, Whitehead M, Neary D, Clayton S, Wright K, Thomson H,  
52  
53 638 Cummins S, Sowden A, Renton A. Appendix 5. Quality assessment for the systematic  
54  
55 639 review of qualitative evidence. Crime, fear of crime and mental health: synthesis of  
56  
57  
58  
59  
60

- 1  
2  
3 640 theory and systematic reviews of interventions and qualitative evidence.  
4  
5 641 Southampton, UK: NIHR Journals Library, 2014.  
6  
7 642 64. Aiken LH, Buchan J, Ball J, Rafferty AM. Transformative impact of Magnet designation:  
8  
9 643 England case study. *J Clin Nurs* 2008;17(24):3330-37.  
10  
11 644 65. Bradley EH, Curry LA, Spatz ES, Herrin J, Cherlin EJ, Curtis JP, Thompson JW, Ting  
12  
13 645 HH, Wang Y, Krumholz HM. Hospital strategies for reducing risk-standardized  
14  
15 646 mortality rates in acute myocardial infarction. *Ann Intern Med* 2012;156(9):618-26.  
16  
17 647 66. Kutney-Lee A, Brennan CW, Meterko M, Ersek M. Organization of nursing and quality  
18  
19 648 of care for veterans at the end of life. *J Pain Symptom Manage* 2015;49(3):570-77.  
20  
21 649 67. Estabrooks CA, Hoben M, Poss JW, Chamberlain SA, Thompson GN, Silvius JL, Norton  
22  
23 650 PG. Dying in a nursing home: treatable symptom burden and its link to modifiable  
24  
25 651 features of work context. *J Am Med Dir Assoc* 2015;16(6):515-20.  
26  
27 652 68. Aiken LH, Cimiotti JP, Sloane DM, Smith HL, Flynn L, Neff DF. Effects of nurse  
28  
29 653 staffing and nurse education on patient deaths in hospitals with different nurse work  
30  
31 654 environments. *Med Care* 2011;49(12):1047-53.  
32  
33 655 69. Cho E, Sloane DM, Eun-Young K, Sera K, Miyoung C, Il Young Y, Hye Sun L, Aiken  
34  
35 656 LH. Effects of nurse staffing, work environments, and education on patient mortality:  
36  
37 657 an observational study. *Int J Nurs Stud* 2015;52(2):535-42.  
38  
39 658 70. Mahl S, Lee SK, Baker GR, Cronin CMG, Stevens B, Ye XY, Canadian Institutes of  
40  
41 659 Health Research Team in Maternal-Infant Care. The Association of organizational  
42  
43 660 culture and quality improvement implementation with neonatal outcomes in the  
44  
45 661 NICU. *J Pediatr Health Care* 2015;29(5):435-41.  
46  
47 662 71. Aiken LH, Shang J, Xue Y, Sloane DM. Hospital use of agency-employed supplemental  
48  
49 663 nurses and patient mortality and failure to rescue. *Health Serv Res* 2013;48(3):931-48.  
50  
51  
52  
53  
54  
55  
56  
57  
58  
59  
60

- 1  
2  
3 664 72. Carthon JMB, Lasater KB, Sloane DM, Kutney-Lee A. The quality of hospital work  
4  
5 665 environments and missed nursing care is linked to heart failure readmissions: a cross-  
6  
7 666 sectional study of US hospitals. *BMJ Qual Saf* 2015;24(4):255-63.  
8  
9  
10 667 73. McHugh MD, Ma CJ. Hospital nursing and 30-day readmissions among Medicare  
11  
12 668 patients with heart failure, acute myocardial infarction, and pneumonia. *Med Care*  
13  
14 669 2013;51(1):52-59.  
15  
16 670 74. Weinberg DB, Avgar AC, Sugrue NM, Cooney-Miner D. The importance of a high-  
17  
18 671 performance work environment in hospitals. *Health Serv Res* 2013;48(1):319-32.  
19  
20  
21 672 75. Chang Y, Mark B. Effects of learning climate and registered nurse staffing on medication  
22  
23 673 errors. *Nurs Res* 2011;60(1):32-39.  
24  
25 674 76. Duffield C, Diers D, O'Brien-Pallas L, Aisbett C, Roche M, King M, Aisbett K. Nursing  
26  
27 675 staffing, nursing workload, the work environment and patient outcomes. *Appl Nurs*  
28  
29 676 *Res* 2011;24(4):244-55.  
30  
31  
32 677 77. Prezerakos P, Galanis P, Moisoglou I. The work environment of haemodialysis nurses  
33  
34 678 and its impact on patients' outcomes. *Int J Nurs Pract* 2015;21(2):132-40.  
35  
36 679 78. Arnetz JE, Arnetz BB. The development and application of a patient satisfaction  
37  
38 680 measurement system for hospital-wide quality improvement. *Int J Qual Health Care*  
39  
40 681 1996;8(6):555-66.  
41  
42  
43 682 79. Tervo-Heikkinen T, Partanen P, Aalto P, Vehviläinen-Julkunen K. Nurses' work  
44  
45 683 environment and nursing outcomes: a survey study among Finnish university hospital  
46  
47 684 registered nurses. *Int J Nurs Pract* 2008;14(5):357-65.  
48  
49  
50 685 80. Tzeng HM, Ketefian S, Redman RW. Relationship of nurses' assessment of  
51  
52 686 organizational culture, job satisfaction, and patient satisfaction with nursing care. *Int J*  
53  
54 687 *Nurs Stud* 2002;39(1):79-84.  
55  
56  
57  
58  
59  
60

- 1  
2  
3 688 81. Tei-Tominaga M, Sato F. Effect of nurses' work environment on patient satisfaction: a  
4  
5 689 cross-sectional study of four hospitals in Japan. *Jpn J Nurs Sci* 2016;13(1):105-13.  
6  
7 690 82. Greenslade JH, Jimmieson NL. Organizational factors impacting on patient satisfaction: a  
8  
9 691 cross sectional examination of service climate and linkages to nurses' effort and  
10  
11 692 performance. *Int J Nurs Pract* 2011;48(10):1188-98.  
12  
13 693 83. Warren N, Hodgson M, Craig T, Dyrenforth S, Perlin J, Murphy F. Employee working  
14  
15 694 conditions and healthcare system performance: the veterans health administration  
16  
17 695 experience. *J Occup Env Med* 2007;49(4):417-29.  
18  
19 696 84. You LM, Aiken LH, Sloane DM, Liu K, He GP, Hu Y, Jiang XL, Li XH, Li XM, Liu HP,  
20  
21 697 Shang SM, Kutney-Lee A, W Sermeus. Hospital nursing, care quality, and patient  
22  
23 698 satisfaction: cross-sectional surveys of nurses and patients in hospitals in China and  
24  
25 699 Europe. *Int J Nurs Stud* 2013;50(2):154-61.  
26  
27 700 85. Kutney-Lee A, McHugh MD, Sloane DM, Cimiotti JP, Flynn L, Neff DF, Aiken LH.  
28  
29 701 Nursing: a key to patient satisfaction. *Health Aff* 2009;28(4):W669-W77.  
30  
31 702 86. Scotti DJ, Harmon J, Behson SJ. Links among high-performance work environment,  
32  
33 703 service quality, and customer satisfaction: an extension to the healthcare sector. *Int J*  
34  
35 704 *Healthc Manag* 2007;52(2):109-24.  
36  
37 705 87. Shortell SM, O'Brien JL, Carman JM, Foster RW, Hughes EFX, Boerstler H, O'Connor  
38  
39 706 EJ. Assessing the impact of continuous quality improvement/total quality  
40  
41 707 management: concept versus implementation. *Health Serv Res* 1995;30(2):377-401.  
42  
43 708 88. Barsade SG, O'Neill OA. What's love got to do with it? A longitudinal study of the  
44  
45 709 culture of companionate love and employee and client outcomes in a long-term care  
46  
47 710 setting. *Adm Sci Q* 2014;59(4):551-98.  
48  
49 711 89. Ma CJ, Park SH. Hospital Magnet status, unit work environment, and pressure ulcers. *J*  
50  
51 712 *Nurs Scholarsh* 2015;47(6):565-73.  
52  
53  
54  
55  
56  
57  
58  
59  
60

- 1  
2  
3 713 90. Meraviglia M, Grobe S, Tabone S, Wainwright M, Shelton S, Yu L, Jordan C. Nurse-  
4  
5 714 friendly hospital project - Enhancing nurse retention and quality of care. *J Nurs Care*  
6  
7 715 *Qual* 2008;23(4):305-13.  
8  
9  
10 716 91. Stone PW, Mooney-Kane C, Larson EL, Horan T, Glance LG, Zwanziger J, Dick AW.  
11  
12 717 Nurse working conditions and patient safety outcomes. *Med Care* 2007;45(6):571-78.  
13  
14 718 92. Temkin-Greener H, Cai SB, Zheng NT, Zhao HW, Mukamel DB. Nursing home work  
15  
16 719 environment and the risk of pressure ulcers and incontinence. *Health Serv Res*  
17  
18 720 2012;47(3):1179-200.  
19  
20  
21 721 93. Purdy N, Laschinger HKS, Finegan J, Kerr M, Olivera F. Effects of work environments  
22  
23 722 on nurse and patient outcomes. *J Nurs Manag* 2010;18(8):901-13.  
24  
25 723 94. Larson EL, Early E, Cloonan P, Sugrue S, Parides M. An organizational climate  
26  
27 724 intervention associated with increased handwashing and decreased nosocomial  
28  
29 725 infections. *Behav Med* 2000;26(1):14-22.  
30  
31  
32 726 95. Virtanen M, Kurvinen T, Terho K, Oksanen T, Peltonen R, Vahtera J, Routamaa M,  
33  
34 727 Elovainio M, Kivimaki M. Work hours, work stress, and collaboration among ward  
35  
36 728 staff in relation to risk of hospital-associated infection among patients. *Med Care*  
37  
38 729 2009;47(3):310-18.  
39  
40  
41 730 96. Borg MA, Waisfisz B, Frank U. Quantitative assessment of organizational culture within  
42  
43 731 hospitals and its relevance to infection prevention and control strategies. *J Hosp Infect*  
44  
45 732 2015;90(1):75-77.  
46  
47 733 97. Cassie KM, Cassie WE. Organizational and individual conditions associated with  
48  
49 734 depressive symptoms among nursing home residents over time. *Gerontologist*  
50  
51 735 2012;52(6):812-21.  
52  
53  
54 736 98. Aiken LH, Clarke SP, Sloane DM, Lake ET, Cheney T. Effects of hospital care  
55  
56 737 environment on patient mortality and nurse outcomes. *J Nurs Adm* 2008;38(5):223-9.  
57  
58  
59  
60

- 1  
2  
3 738 99. Gardner JK, Thomas-Hawkins C, Fogg L, Latham CE. The relationships between nurses'  
4  
5 739 perceptions of the hemodialysis unit work environment and nurse turnover, patient  
6  
7 740 satisfaction, and hospitalizations. *Nephrol Nurs J* 2007;34(3):271-82.  
8  
9  
10 741 100. Benning A, Ghaleb M, Suokas A, Dixon-Woods M, Dawson J, Barber N, Franklin BD,  
11  
12 742 Girling A, Hemming K, Carmalt M, Rudge G, Naicker T, Nwulu U, Choudhury S,  
13  
14 743 Lilford R. Large scale organisational intervention to improve patient safety in four  
15  
16 744 UK hospitals: mixed method evaluation. *BMJ* 2011;342.  
17  
18  
19 745 101. Greenhalgh T, Robert G, Macfarlane F, Bate P, Kyriakidou O. Diffusion of innovations  
20  
21 746 in service organizations: systematic review and recommendations. *Milbank Q*  
22  
23 747 2004;82(4):581-629.  
24  
25 748  
26  
27  
28  
29  
30  
31  
32  
33  
34  
35  
36  
37  
38  
39  
40  
41  
42  
43  
44  
45  
46  
47  
48  
49  
50  
51  
52  
53  
54  
55  
56  
57  
58  
59  
60



1  
2  
3  
4  
5  
6  
7  
8  
9  
10  
11  
12  
13  
14  
15  
16  
17  
18  
19  
20  
21  
22  
23  
24  
25  
26  
27  
28  
29  
30  
31  
32  
33  
34  
35  
36  
37  
38  
39  
40  
41  
42  
43  
44  
45  
46  
47  
48  
49  
50  
51  
52  
53  
54  
55  
56  
57  
58  
59  
60

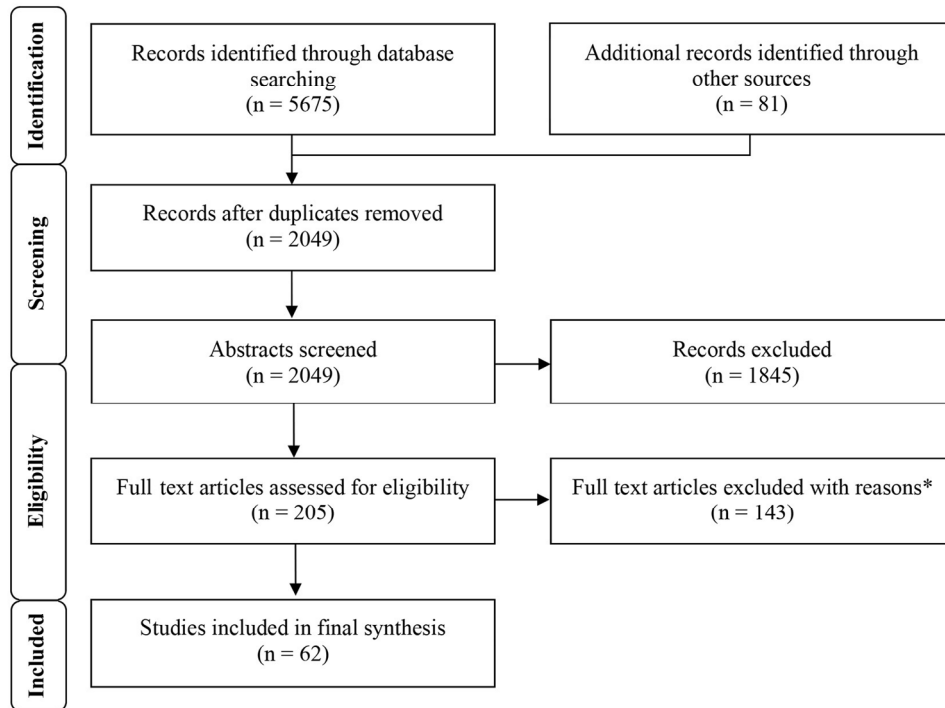

Search strategy

147x108mm (300 x 300 DPI)

Review only

1  
2  
3  
4  
5  
6  
7  
8  
9  
10  
11  
12  
13  
14  
15  
16  
17  
18  
19  
20  
21  
22  
23  
24  
25  
26  
27  
28  
29  
30  
31  
32  
33  
34  
35  
36  
37  
38  
39  
40  
41  
42  
43  
44  
45  
46  
47  
48  
49  
50  
51  
52  
53  
54  
55  
56  
57  
58  
59  
60

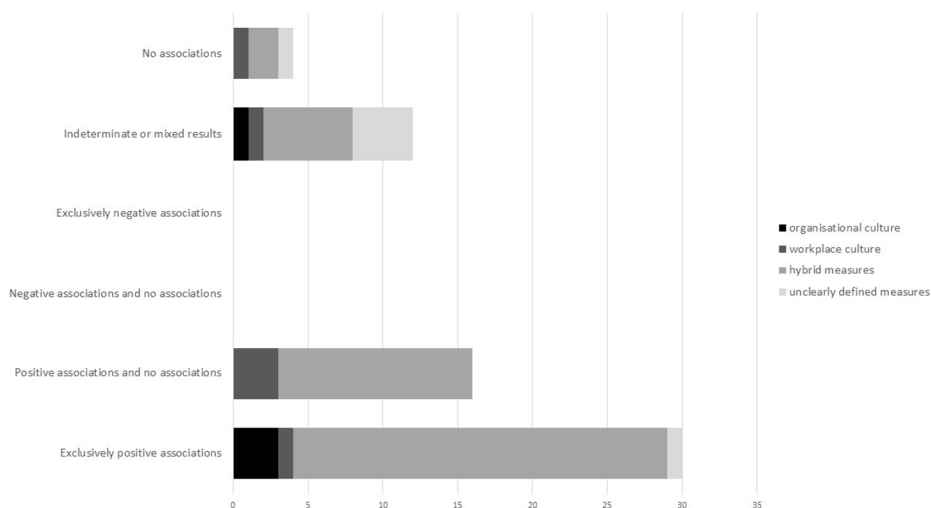

Categorisation of direction of studies (number of studies)

108x60mm (300 x 300 DPI)

review only

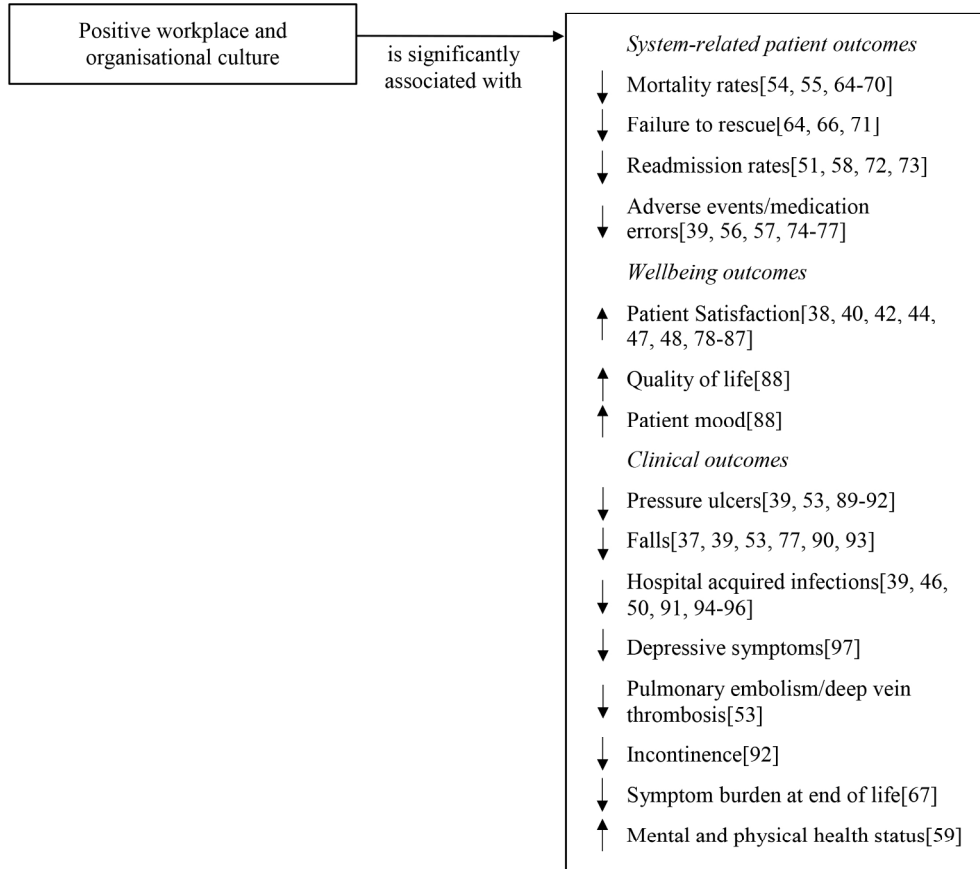

Key associations between culture and patient outcomes here

189x195mm (300 x 300 DPI)

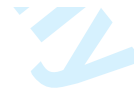

# BMJ Open Association between organisational and workplace cultures, and patient outcomes: systematic review protocol

J Braithwaite, J Herkes, K Ludlow, G Lamprell, L Testa

**To cite:** Braithwaite J, Herkes J, Ludlow K, *et al*. Association between organisational and workplace cultures, and patient outcomes: systematic review protocol. *BMJ Open* 2016;**6**: e013758. doi:10.1136/bmjopen-2016-013758

► Prepublication history for this paper is available online. To view these files please visit the journal online (<http://dx.doi.org/10.1136/bmjopen-2016-013758>).

Received 5 August 2016  
Revised 4 October 2016  
Accepted 5 October 2016

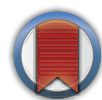

CrossMark

Centre for Healthcare Resilience and Implementation Science, Australian Institute of Health Innovation, Macquarie University, North Ryde, New South Wales, Australia

## Correspondence to

Professor J Braithwaite;  
[jeffrey.braithwaite@mq.edu.au](mailto:jeffrey.braithwaite@mq.edu.au)

## ABSTRACT

**Introduction:** Despite widespread interest in the topic, no current synthesis of research is available analysing the linkages between organisational or workplace cultures on the one hand, and patient outcomes on the other. This protocol proposes a systematic review to analyse and synthesise the literature to date on this topic. The resulting review will discuss characteristics of included studies in terms of the type of healthcare settings researched, the measurements of organisational and workplace culture, patient outcomes measured and the influence of these cultures on patient outcomes.

**Methods and analysis:** A systematic review will be conducted aiming to examine the associations between organisational and workplace cultures, and patient outcomes, guided by the Preferred Reporting Items for Systematic review and Meta-Analysis Protocols (PRISMA-P) statement. An English language search of abstracts will be executed using the following academic databases: CINAHL, EMBASE, Ovid MEDLINE, Web of Science and PsycINFO. The review will include relevant peer-reviewed articles from randomised controlled trials (RCTs), non-RCTs, controlled before and after studies, interrupted time series studies, cross-sectional analyses, qualitative studies and mixed-method studies. Multiple researchers will be involved in assessing the quality of articles for inclusion in the review. This protocol documents a detailed search strategy, including terms and inclusion criteria, which will form the basis of the subsequent systematic review.

**Ethics and dissemination:** Ethics approval is not required as no primary data will be collected. Results will be disseminated through a peer-reviewed publication and conference presentations.

## INTRODUCTION

### Rationale

A positive and productive culture, within workplaces and across the wider organisation, is believed to be an important factor in determining the quality of clinical and organisational outputs and outcomes.<sup>1</sup> In healthcare settings, the possible downstream effects of culture are particularly important

## Strengths and limitations of this study

- We lack adequate understanding of how cultural characteristics in healthcare organisations and workplaces are related to patient outcomes.
- Organisational and workplace cultures are hard to define, making inclusion criteria subjective.
- The review will include studies ranging from randomised controlled trials to mixed-method studies.
- We will follow the Preferred Reporting Items for Systematic review and Meta-Analysis Protocols (PRISMA-P), Grading of Recommendations Assessment, Development and Evaluation (GRADE) framework and COCHRANE tools for assessing the risk of bias.

as they concern patient outcomes, which can range from morbidity, to acquired infections, to quality of life, to mortality.<sup>2-3</sup> Despite these potential consequences, we do not know with sufficient confidence about the association between organisational and workplace cultures, and patient outcomes, in healthcare environments. Enhanced knowledge of this association is necessary in order to understand how to improve health systems. Past research highlights this knowledge gap<sup>1-4</sup> and has laid the foundation for the proposed systematic review.

## Cultures and subcultures

Culture has been described in many ways in the literature, ranging from simple definitions to complex models.<sup>4-7</sup> Simply put, culture is a way of holistically understanding the summed characteristics of organisational behaviour, thinking and attitudes.<sup>8-9</sup> A predominant model of culture is the iceberg model, which refers to culture as a two-part phenomenon.<sup>10</sup> Above the waterline are observable workplace behaviours and practices, while below the waterline lie the foundational group beliefs, attitudes, values and philosophies of the workplace.<sup>10</sup> By way of

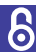

1 comparison, Schein's 2004 tripartite model of culture  
2 includes visible organisational structures and underlying  
3 assumptions of culture. Schein's model also comprises a  
4 third level, equivalent to an 'at the waterline' level,  
5 which encompasses beliefs and values, as observed in  
6 rhetoric and anchored in behaviour.<sup>9 11</sup>

7 In organisational culture, behavioural patterns, beliefs  
8 and assumptions are shared throughout a setting.<sup>4</sup>  
9 Subcultures can have many bases, including occupa-  
10 tional, gender or racial distinctions.<sup>12 13</sup> Within this  
11 healthcare setting, there are also workplace-specific cul-  
12 tures, which are explicit examples of subcultures.<sup>14</sup>  
13 Gallego *et al*<sup>15</sup> reported that cultural differences mani-  
14 fest between different service types. For example, in that  
15 study, community nursing and breast screening units  
16 had a more favourable safety attitudes culture compared  
17 with mental health wards. Such differentiated, localised  
18 workplace cultures can be analysed in terms of their  
19 similarities or their differences across the broader  
20 healthcare organisation.<sup>9 14</sup>

21 While there are always definitional challenges with  
22 complex social constructs,<sup>16</sup> this protocol adopts a plur-  
23 alist perspective; recognising that distinguishable work-  
24 place cultures are components of a wider organisational  
25 culture.<sup>14</sup> Therefore, this review protocol considers  
26 *organisational* culture and *workplace* culture as research-  
27 able, index concepts.

## 30 Past reviews

31 Previous reviews have focused on the influence of  
32 organisational *climate* on patient outcomes, which  
33 MacDavitt *et al*<sup>2</sup> define as "employees' perception of the  
34 organizational culture". In differentiating between  
35 organizational culture and climate, and focusing on the  
36 latter, MacDavitt *et al*<sup>2</sup> present a broad-based understand-  
37 ing of organisational climate mapped to the tip of the  
38 iceberg in Braithwaite's<sup>10</sup> model.<sup>2</sup> This protocol will  
39 complement and expand on MacDavitt *et al*'s<sup>2</sup> review by  
40 encompassing articles on culture and climate.

41 Other reviews have been restrictive in their inclusion  
42 criteria, leading to a narrow understanding of the associ-  
43 ation between organisational and workplace cultures,  
44 and patient outcomes. Parmelli *et al*'s<sup>4</sup> systematic review  
45 focused on the effects of culture change *interventions* on  
46 patient outcomes and healthcare performance. Owing  
47 to this limited focus, only two relevant studies were  
48 included in that systematic review.<sup>4</sup> On the other hand,  
49 Willis *et al*<sup>17</sup> used a realist review method to examine  
50 relationships between interventions and sustained  
51 culture change. Separate review work has yielded results  
52 with limited generalisability by focusing on prespecified  
53 healthcare environmental variables, such as nursing  
54 culture<sup>18-20</sup> or surgical procedures.<sup>21</sup> Other work by the  
55 'Deepening our Understanding of Quality improvement  
56 in Europe' (DUQuE) team examined relationships  
57 between organisational-level culture and quality manage-  
58 ment systems.<sup>22</sup> In contrast, other reviews have chosen a  
59 wider inclusion criteria, encompassing how organisational

60 culture broadly affected healthcare performance.<sup>5 23</sup> Our  
protocol offers a middle-ground, by mapping culture to  
the specific concept of patient outcomes in various  
healthcare settings.

## Patient outcomes

Turning to our other major construct, patient outcomes,  
in ways analogous to the manner in which culture has  
been treated, past research has been restrictive in the  
search terms included for reviews. MacDavitt *et al*<sup>2</sup> iden-  
tified 12 articles measuring patient outcomes, but only 3  
of these incorporated more than one specific element  
of patient outcomes. Of the studies included in Parmelli  
*et al*'s<sup>4</sup> systematic review, one measured the frequency of  
handwashing practices and its association with the  
patient outcome of infection,<sup>24</sup> and the second mea-  
sured vitality, life satisfaction and orientation to life.<sup>25</sup>  
Another example is Hesselink *et al*'s 2013 paper which  
concentrated on the measurement of patient discharge.<sup>1</sup>

This norm of only reporting a small number of  
specific patient outcomes—in systematic reviews and in  
original research—means that only a limited under-  
standing of the association between culture and patient  
outcomes has been achieved. Hence, the current study  
aims to encompass a mix of patient outcomes to provide  
a holistic understanding of the association of outcomes  
with organisational and workplace cultures.

## Objectives

In this protocol, we widen the scope of past reviews; we  
aim to thoroughly investigate *the extent to which organisa-  
tional and workplace cultures are associated with patient out-  
comes across a range of healthcare settings*. Our objective in  
this paper is to articulate the design of a systematic  
review aiming to evaluate and synthesise relevant litera-  
ture on this topic. Ultimately, the outcome of the review  
will be to offer nuanced information for researchers,  
managers, health professionals, clinicians, healthcare  
decision-makers, health policymakers and patient groups  
interested in understanding how cultures and outcomes  
relate. We are mindful, however, of what Mannion and  
Davies<sup>26</sup> have recently had to say about this topic:  
"attempting to enact culture change to improve per-  
formance is a difficult, uncertain, and risky enterprise".

## METHODS

### Eligibility criteria

#### Participants

Participating healthcare facilities may include hospitals,  
acute and primary healthcare facilities, health organisa-  
tions and other health delivery services. These facilities  
may be public or private, and situated in metropolitan  
or rural locations.

#### Indicators

This study will use indicators that measure aspects of  
organisational and workplace cultures, and patient

**Table 1** Search strategy

| Search term keyword               | Related terms/synonyms                                                                                                                                                                                                                                                                                                                                    | Alternative terms                                                |
|-----------------------------------|-----------------------------------------------------------------------------------------------------------------------------------------------------------------------------------------------------------------------------------------------------------------------------------------------------------------------------------------------------------|------------------------------------------------------------------|
| Organisational, workplace culture | Work culture OR organization* culture OR service culture OR corporate culture OR work climate OR organization* climate OR service climate OR corporate climate OR work ethos OR organization* ethos OR service ethos OR corporate ethos OR work environment OR organization* environment OR service environment OR corporate environment                  | Organisation<br>Work place<br>Workplace<br>Work site<br>Worksite |
| AND<br>Patient outcomes           | Patient outcome* OR patient satisfaction OR health outcome* OR patient experience* OR mortality OR length of stay OR pain level OR cost of care OR functional abilit* OR patient knowledge OR quality of life OR impairment* OR disabilit* OR readmission rate* OR adverse event* OR medication error* OR patient fall* OR infection* OR decubitus ulcer* |                                                                  |
| AND<br>Healthcare                 | Health organization* OR hospital* OR health facilit* OR acute care OR primary care OR health                                                                                                                                                                                                                                                              | Organisation<br>Healthcare<br>Health care<br>Health-care         |

\*Is used to signify truncation.

outcomes. Approaches to measure and assess culture and outcomes vary widely, and therefore, it is expected that the mechanisms and tools used will be heterogeneous throughout the studies reviewed.

#### Comparisons between culture and patient outcomes

Comparisons may be made where feasible between cultures in similar types of health setting; for example, between acute hospitals that have comparable size, economic funding and patient–nurse ratios. Cultural comparisons are also envisaged between different types of health settings such as between metropolitan and rural environments.

#### Outcome measures

Patient outcome measures, as detailed in the search strategy (table 1), will include objective and quantifiable measurements. The inclusion of broad terms such as ‘patient outcomes’ and more specific terms such as ‘patient falls’ recognises that studies may focus on identifiable aspects of patient outcomes.

#### Report characteristics

Publications will be assessed against the following inclusion criteria: English language, peer-reviewed, primary empirical research articles, published in scholarly journals. Full texts must also be available. A date restriction will not be applied to the search. Studies will include randomised controlled trials (RCTs), non-RCTs, controlled before and after (CBA) studies, interrupted time series (ITS) studies, cross-sectional analysis, qualitative studies and mixed-method studies. We believe that these methods—provided that they include valid, rigorous, peer-reviewed research on patient outcomes—can provide useful information regarding the association between organisational and workplace cultures, and

patient outcomes. Grey literature will be excluded from this study as invariably such work falls outside our ‘valid, rigorous, peer-reviewed’ criteria.

#### Information sources

The search terms (table 1) will be entered into the following academic databases: CINAHL, EMBASE, Ovid MEDLINE, Web of Science and PsycINFO. Multiple search terms will be used to identify workplace and organisation cultures, patient outcomes and healthcare settings.

#### Study records

##### Data management

The initial search will be carried out by a two primary researchers (KL and JH) using the strategy indicated in table 1 and guided by the Preferred Reporting Items for Systematic review and Meta-Analysis Protocols (PRISMA-P) statement. KL and JH will also search the reference lists of identified reviews for other relevant articles, and experts in the field will be contacted for advice on potentially appropriate articles. Other researchers in the team will sample-test the strategy for fidelity. KL will import the data into an EndNote library and will delete duplicate entries. These will be checked for accuracy by a third researcher (LT).

#### Selection and data collection processes

The reviewers, JH, KL, GL and LT, will compare 5% of the EndNote library to ensure a consensus across article retention. Inter-rater agreement analysis will be conducted from these results. Any inconsistencies will be discussed and resolved by the research team in the light of the research question and inclusion criteria; JB will be the final arbitrator. These four researchers will then each independently review 25% of the remaining

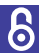

abstracts in line with the inclusion criteria, followed by a full-text review of included abstracts. Reasons for excluding studies will be recorded. Information extracted from included articles will comprise the healthcare context, aspects of culture measured, methodology, sample size, intervention (if applicable) and all reported patient outcomes.

### Data items and definitions

This protocol is based on ambiguous concepts, with inconsistent expert consensus on their definitions. As such, we define the variables used in this systematic review protocol (box 1).

This systematic review protocol is founded on transparent assumptions. First, as MacDavitt *et al*<sup>2</sup> highlight, organisational culture and organisational climate are terms often used interchangeably in published literature, as the distinction between the terms is not clear-cut.<sup>9 27</sup> It can be argued that organisational climate is a subset of organisational culture, characterised by specific data collection tools and resources.<sup>5</sup> Organisational culture encompasses these data collection methods in addition to other techniques. We adopted this logic to establish a view that we would include the terms 'climate', 'culture' and 'environment' in the systematic review.

### Outcomes and prioritisation

Prioritisation of the search strategy items will ultimately improve the way articles are presented in the review. Priority will be given to articles which include multiple patient outcomes and measures of culture. Prioritisation will also be given to articles that study organisational or workplace culture as a whole.

### Risk of bias in individual studies

The review findings will be limited by the results of the search strategy and the potential inclusion of non-randomised studies. To assess the inherent risk of bias in individual studies, two researchers (JH and LT) will actively consult the Cochrane Handbook for Systematic Reviews, specifically the Cochrane Collaboration tool for assessing the risk of bias. JH and LT will independently

#### Box 1 Definitions of variables

**Organisational culture:** The sum total of the behaviours and practices, attitudes and beliefs, across the whole enterprise, for example, across an entire hospital.<sup>22 27</sup>

**Workplace culture:** The more specific defining group characteristics within a component of an organisation, for example, intensive care unit, ward, department, section or professional grouping, for example, nursing or management.<sup>9 28</sup>

**Patient outcomes** End results that consist of and can be used to measure the consequences of a patient's care, which can be positive or negative, and vary in severity.<sup>29</sup> Refer to table 1 for examples.

assess each study and classify them as 'high' or 'low' risk of bias. Any disagreements between the researchers will be resolved by discussion with a third and fourth researcher (KL, GL).

### Data synthesis

Based on prior systematic reviews, it is not likely that the relevant articles will allow a quantitative meta-analysis of data.<sup>2 4</sup> However, if this does eventuate, a random-effects model will be used.<sup>30</sup> Heterogeneous data on patient outcomes will be analysed based on the nature of the variables, for example, a risk ratio for dichotomous outcomes, HR for time-to-event outcomes, rate ratio for counts or rates or standardised mean difference for continuous outcomes. A 95% CI will also be calculated and applied.<sup>30</sup>

### Confidence in cumulative evidence

The strength of the studies will be assessed through the Grading of Recommendations Assessment, Development and Evaluation (GRADE) framework. To synthesise the research quality, we will assign each study on the GRADE rating scale for evidence quality (high, moderate, low, very low) and we will, as appropriate, provide Evidence Profile (EP) and Summary of Finding (SOF) Tables.

### CONCLUSION

Organisational and workplace cultures are important concepts. Many policymakers, managers and clinicians conduct projects and initiatives aimed at influencing, shaping or altering their local cultures. We do not know the extent to which, and how, these strategies are related to downstream effects on patient outcomes. This review will inform future initiatives of this kind.

**Acknowledgements** The authors would like to thank Jeremy Cullis, Clinical Librarian, Macquarie University, for proving his expertise on the use of academic databases and for reviewing our search strategy.

**Contributors** JB led the study and provided a conceptualisation of the topic to the team. JH, KL, GL and LT developed the objectives and methods of the review including the search strategy. JH and KL produced the initial draft of the manuscript in conjunction with JB, with GL and LT providing critical revisions.

**Funding** This work is supported by NHMRC Program Grant 1054146.

**Competing interests** None declared.

**Provenance and peer review** Not commissioned; externally peer reviewed.

**Open Access** This is an Open Access article distributed in accordance with the Creative Commons Attribution Non Commercial (CC BY-NC 4.0) license, which permits others to distribute, remix, adapt, build upon this work non-commercially, and license their derivative works on different terms, provided the original work is properly cited and the use is non-commercial. See: <http://creativecommons.org/licenses/by-nc/4.0/>

### REFERENCES

- Hesselink G, Vernooij-Dassen M, Pijnenborg L, *et al*. Organizational culture: an important context for addressing and improving hospital to community patient discharge. *Med Care* 2013;51:90–8.
- MacDavitt K, Chou S, Stone P. Organizational climate and health care outcomes. *Jt Comm J Qual Saf* 2007;33(11 Suppl):45–56.

3. Page A, ed. *Keeping patients safe: transforming the work environment of nurses*. Washington, DC: The National Academies Press, 2004.
4. Parmelli E, Flodgren G, Beyer F, et al. The effectiveness of strategies to change organisational culture to improve healthcare performance: a systematic review. *Implement Sci* 2011;6:1–8.
5. Scott T, Mannion R, Davies H, et al. The quantitative measurement of organizational culture in health care: a review of the available instruments. *Health Serv Res* 2003;38:923–45.
6. Davies HT, Mannion R. Will prescriptions for cultural change improve the NHS? *BMJ* 2013;346:f1305.
7. Mannion R, Davies H, Marshall M. *Cultures for performance in health care*. Buckingham: Open University Press, 2005.
8. Braithwaite J, Westbrook MT, Iedema R, et al. A tale of two hospitals: assessing cultural landscapes and compositions. *Soc Sci Med* 2005;60:1149–62.
9. Braithwaite J, Hyde P, Pope C. *Culture and climate in health care organizations*. Basingstoke, London: Palgrave Macmillan, 2010.
10. Braithwaite J. A lasting legacy from Tony Blair? NHS culture change. *J R Soc Med* 2011;104:87–9.
11. Schein E. *Organizational culture and leadership*. San Francisco, CA: Jossey-Bass, 2004.
12. Callen J, Braithwaite J, Westbrook JI. The importance of medical and nursing sub-cultures in the implementation of clinical information systems. *Method Inform Med* 2009;48:196–202.
13. Callen JL, Braithwaite J, Westbrook JI. Cultures in hospitals and their influence on and attitudes to, and satisfaction with, the use of clinical information systems. *Soc Sci Med* 2007;65: 635–9.
14. Martin J. *Organizational culture: mapping the terrain*. Thousand Oaks, CA: Sage, 2001.
15. Gallego B, Westbrook MT, Dunn AG, et al. Investigating patient safety culture across a health system: multilevel modelling of differences associated with service types and staff demographics. *Int J Qual Health Care* 2012;24:311–20.
16. Davies H, Nutley S, Mannion R. Organisational culture and quality in health care. *BMJ Qual Saf* 2000;9:111–9.
17. Willis CD, Saul J, Bevan H, et al. Sustaining organizational culture change in health systems. *J Health Organ Manag* 2016;30:2–30.
18. Krueger L, Funk C, Green J, et al. Nurse-related variables associated with patient outcomes: a review of the literature 2006–2012. *Teach Learn Nurs* 2013;8:120–7.
19. Stalpers D, de Brouwer BJ, Kaljouw MJ, et al. Associations between characteristics of the nurse work environment and five nurse-sensitive patient outcomes in hospitals: a systematic review of literature. *Int J Nurs Stud* 2015;52:817–35.
20. Wong CA, Cummings GG, Ducharme L. The relationship between nursing leadership and patient outcomes: a systematic review update. *J Nurs Manag* 2013;21:709–24.
21. Sacks GD, Shannon EM, Dawes AJ, et al. Teamwork, communication and safety climate: a systematic review of interventions to improve surgical culture. *BMJ Qual Saf* 2015;24:458–67.
22. Wagner C, Mannion R, Hammer A, et al. The associations between organizational culture, organizational structure and quality management in European hospitals. *Int J Qual Health Care* 2014;26 (Suppl 1):74–80.
23. Scott T, Mannion R, Marshall M, et al. Does organisational culture influence health care performance? A review of the evidence. *J Health Serv Res Policy* 2003;8:105–17.
24. Larson EL, Early E, Cloonan P, et al. An organisational climate intervention associated with increased handwashing and decreased nosocomial infections. *Behav Med* 2000;26:14–22.
25. Kinjerski V, Skrypnek BJ. The promise of spirit at work: increasing job satisfaction and organizational commitment and reducing turnover and absenteeism in long-term care. *J Gerontol Nurs* 2008;34:17–25.
26. Mannion R, Davies H. Culture in health care organizations. In: Ferlie E, Montgomery K, Pederson AR, eds. *Oxford handbook of health care management*. Oxford, UK: Oxford University Press, 2016:93–116.
27. Ashkanasy N, Wilderom C, Peterson M. *Handbook of organizational culture and climate*. Thousand Oaks, CA: Sage, 2000.
28. Jacobs R, Mannion R, Davies HT, et al. The relationship between organisational culture and performance in acute hospitals. *Soc Sci Med* 2013;76:115–25.
29. Nosrati H, Clay-Williams R, Cunningham F, et al. The role of organisational and cultural factors in the implementation of system-wide interventions in acute hospitals to improve patient outcomes: protocol for a systematic literature review. *BMJ Open* 2013;3:e002268.
30. Shamseer L, Moher D, Clarke M, et al. Preferred reporting items for systematic review and meta-analysis protocols (PRISMA-P) 2015: elaboration and explanation. *BMJ* 2015;349:g7647.



BMJ Open

# Association between organisational and workplace cultures, and patient outcomes: systematic review protocol

J Braithwaite, J Herkes, K Ludlow, G Lamprell and L Testa

*BMJ Open* 2016 6:

doi: 10.1136/bmjopen-2016-013758

---

Updated information and services can be found at:  
<http://bmjopen.bmj.com/content/6/12/e013758>

---

*These include:*

## References

This article cites 23 articles, 7 of which you can access for free at:  
<http://bmjopen.bmj.com/content/6/12/e013758#BIBL>

## Open Access

This is an Open Access article distributed in accordance with the Creative Commons Attribution Non Commercial (CC BY-NC 4.0) license, which permits others to distribute, remix, adapt, build upon this work non-commercially, and license their derivative works on different terms, provided the original work is properly cited and the use is non-commercial. See: <http://creativecommons.org/licenses/by-nc/4.0/>

## Email alerting service

Receive free email alerts when new articles cite this article. Sign up in the box at the top right corner of the online article.

---

## Topic Collections

Articles on similar topics can be found in the following collections

[Health policy](#) (640)  
[Health services research](#) (1380)  
[Research methods](#) (585)

---

## Notes

To request permissions go to:

<http://group.bmj.com/group/rights-licensing/permissions>

To order reprints go to:

<http://journals.bmj.com/cgi/reprintform>

To subscribe to BMJ go to:

<http://group.bmj.com/subscribe/>

## Supplementary File B. Data Extraction Sheet

| Parameters           | Detail                                                                                                                                                                                       | Reviewer entry                                                                                                                                                                                                                                                          |
|----------------------|----------------------------------------------------------------------------------------------------------------------------------------------------------------------------------------------|-------------------------------------------------------------------------------------------------------------------------------------------------------------------------------------------------------------------------------------------------------------------------|
| Endnote ref #        |                                                                                                                                                                                              |                                                                                                                                                                                                                                                                         |
| Reference            | <i>Authors, year, article title, journal name, vol, issue, page numbers (use Harvard Ref Style)</i>                                                                                          |                                                                                                                                                                                                                                                                         |
| Location             | <i>Country</i>                                                                                                                                                                               |                                                                                                                                                                                                                                                                         |
| Language             | <i>English only</i>                                                                                                                                                                          |                                                                                                                                                                                                                                                                         |
| Time frame           | <i>Period of data collection</i>                                                                                                                                                             |                                                                                                                                                                                                                                                                         |
| Study type           | <i>e.g., qualitative, mixed methods, intervention study</i>                                                                                                                                  |                                                                                                                                                                                                                                                                         |
| Study primary aim    | <i>e.g., test performance of organisations with different cultures; test an intervention</i>                                                                                                 |                                                                                                                                                                                                                                                                         |
| Study secondary aims | <i>e.g., identify factors associated with organisational culture</i>                                                                                                                         |                                                                                                                                                                                                                                                                         |
| Exclude?             | <i>Circle include or exclude, + reason if excluded</i>                                                                                                                                       | <ol style="list-style-type: none"> <li>1. Other languages</li> <li>2. Not peer reviewed literature</li> <li>3. Not healthcare setting</li> <li>4. Not primary empirical research</li> <li>5. Does not include organisational culture and/or patient outcomes</li> </ol> |
| Data                 | <i>Total N of organisation participants (e.g. three hospitals)</i>                                                                                                                           |                                                                                                                                                                                                                                                                         |
|                      | <i>Type of organisation participant (e.g. teaching hospital)</i>                                                                                                                             |                                                                                                                                                                                                                                                                         |
|                      | <i>Data types and sources used to performance and/or outcomes</i>                                                                                                                            |                                                                                                                                                                                                                                                                         |
|                      | <i>Methodological/statistical approach to identifying performance and/or outcomes</i>                                                                                                        |                                                                                                                                                                                                                                                                         |
| Methods              | <i>Methods used to study organisational or workplace culture or climate, and patient outcomes—summarise content of tools (e.g., interview questions/topics, surveys) used where possible</i> |                                                                                                                                                                                                                                                                         |

|                     |                                                                                                                                                        |  |
|---------------------|--------------------------------------------------------------------------------------------------------------------------------------------------------|--|
|                     | <i>Participants (e.g., nurses)</i>                                                                                                                     |  |
|                     | <i>Data analysis methods (e.g., statistical or quantitative method)</i>                                                                                |  |
| <b>Findings</b>     | <i>Quantitative results</i>                                                                                                                            |  |
|                     | <i>Qualitative results/ contextual factors most important for explaining relationship between culture and patient outcomes. Include example quotes</i> |  |
| <b>Implications</b> | <i>Recommendations for healthcare made based on the findings</i>                                                                                       |  |

Note. Table adapted from Taylor N, Clay-Williams R, Hogden E, Braithwaite J, Groene O. High performing hospitals: a qualitative systematic review of associated factors and practical strategies for improvement. *BMC Health Serv Res.* 2015;15(1):244.

## Supplementary File C. Risk of Bias Template

| Type of Bias            | Description                                                                                    | Example in Intervention Studies                                                                                                                                                                                  | Example of an Equivalent Scenario in Included Studies                                                                                |
|-------------------------|------------------------------------------------------------------------------------------------|------------------------------------------------------------------------------------------------------------------------------------------------------------------------------------------------------------------|--------------------------------------------------------------------------------------------------------------------------------------|
| <b>Selection bias</b>   | The bias that occurs when groups are not randomised and thus comparisons cannot be made        | Systematic differences in baseline characteristics between the groups, leading to biases when comparing results after an intervention; randomised groups being used                                              | That the context of the study was a convenience or purposive sample, or was not the most appropriate context for the study           |
| <b>Performance bias</b> | When study participants or researchers have knowledge of the study or its aims                 | Systematic differences in the care provided between the groups, or exposure to other confounding variables that influence results; can be minimised through double blinding (and reporting on its effectiveness) | Performance of the nurses or health professionals altering due to knowledge that patient outcomes are being measured                 |
| <b>Detection bias</b>   | Systematic differences in results due to the assessor's knowledge of study or group allocation | Differences in how outcomes are determined between groups; can be prevented through blinding of researchers                                                                                                      | Researchers interpreting the results have knowledge of the aims and hypotheses of the study, and the results are altered accordingly |
| <b>Attrition bias</b>   | The incompleteness of data due to participants withdrawing from the study                      | Systematic differences in withdrawals of groups from studies, leading to incomplete outcome data                                                                                                                 | The rate of non-participation e.g., in survey responses, the dropout rates between nurses and doctors                                |
| <b>Reporting bias</b>   | Selective reporting of outcomes                                                                | Difference in the probability of reporting significant versus insignificant findings                                                                                                                             | Significant findings more likely to be published than less important results                                                         |
| <b>Other bias</b>       | Any other important concerns regarding the study                                               | Biases that are found in a particular study setting                                                                                                                                                              | Bias due to issues not otherwise outlined here                                                                                       |

*Note.* Table descriptions derived from Higgins J, Altman D, Sterne J. Chapter 8. Assessing risk of bias in included studies. In: Higgins J, Green S, eds. *Cochrane Handbook for Systematic Reviews of Interventions Version 5.1.0*: The Cochrane Collaboration; 2011. Examples are the authors', based on included studies.

## Supplementary File D. Summary of Included Articles

| Study              | Study objective(s)                                                                                                                     | Study design                        | Measures                                                                                                                                                                                                                                                                                                                                                          | Participants; Duration                                                                 | Context; Setting   | Key findings                                                                                                                                                                                                                                                                                                      | Quality rating |
|--------------------|----------------------------------------------------------------------------------------------------------------------------------------|-------------------------------------|-------------------------------------------------------------------------------------------------------------------------------------------------------------------------------------------------------------------------------------------------------------------------------------------------------------------------------------------------------------------|----------------------------------------------------------------------------------------|--------------------|-------------------------------------------------------------------------------------------------------------------------------------------------------------------------------------------------------------------------------------------------------------------------------------------------------------------|----------------|
| Aiken et al., 2008 | Analyse the net effects of nurse practice environments on nurse and patient outcomes after accounting for nurse staffing and education | Quantitative, cross-sectional study | <p><b>Work environment:</b><br/>Practice Environment Scale of the Nursing Work Index (PES-NWI); six survey measures assessing job satisfaction, burnout, and intent to leave job within the next year; three questions assessing nurses' perceptions of quality of care</p> <p><b>Patient outcome(s):</b> 30-day mortality rates from discharge abstract data</p> | <p>232,342 patients; 10,184 nurses</p> <p>Data collected April 1998- November 1999</p> | 168 hospitals; USA | <p>Care environment, along with nurses' education levels and nurse staffing, contributed to failure to rescue and mortality rates. Poorer environment had higher rates of mortality and failure-to-rescue</p> <p>Surgical mortality rates were more than 60% higher in hospitals with a poor work environment</p> | High           |
| Aiken et al., 2011 | Determine the conditions under which the impact of hospital nurse staffing, nurse education, and work environment are associated       | Quantitative, cross-sectional study | <p><b>Work environment:</b><br/>Practice Environment Scale of the Nursing Work Index (PES-NWI)</p> <p><b>Patient outcome(s):</b><br/>Patient deaths within 30 days of hospital admission and failure to rescue from the American Hospital</p>                                                                                                                     | <p>1,262,120 patients, 39,038 nurses</p> <p>Data collected 2005-2006</p>               | 665 hospitals; USA | Lowering the patient-to-nurse ratios significantly improved patient outcomes in hospitals with good work environments, somewhat improved patient outcomes in hospitals with average work environments, and had no effect on patient                                                                               | Medium         |

| Study                 | Study objective(s)                                                                                                                                                | Study design                        | Measures                                                                                                                                                                                                                                                                                                      | Participants; Duration                                            | Context; Setting                       | Key findings                                                                                                                                                                                                                                                                                                                                                                                   | Quality rating |
|-----------------------|-------------------------------------------------------------------------------------------------------------------------------------------------------------------|-------------------------------------|---------------------------------------------------------------------------------------------------------------------------------------------------------------------------------------------------------------------------------------------------------------------------------------------------------------|-------------------------------------------------------------------|----------------------------------------|------------------------------------------------------------------------------------------------------------------------------------------------------------------------------------------------------------------------------------------------------------------------------------------------------------------------------------------------------------------------------------------------|----------------|
|                       | with patient outcomes                                                                                                                                             |                                     | Association (AHA) Annual Survey                                                                                                                                                                                                                                                                               |                                                                   |                                        | outcomes in hospitals with poor work environments                                                                                                                                                                                                                                                                                                                                              |                |
| Aiken et al., 2013    | Determine the association between the use of agency-employed supplemental registered nurses (SRNs) to staff hospitals and patient mortality and failure to rescue | Quantitative, cross-sectional study | <p><b>Work environment:</b><br/>Hospital use of SRNs; Practice Environment Scale of the Nursing Work Index (PES-NWI); nurse staffing metrics; nurse education metrics</p> <p><b>Patient outcome(s):</b> 30-day inpatient mortality and failure to rescue obtained from annual patient discharge summaries</p> | 40,356 registered nurses<br><br>Data collected 2005-2006          | 665 hospitals; USA                     | <p>Before controlling for nurse and hospital characteristics, higher proportions of SRNs nurses in hospitals were associated with higher mortality and failure to rescue</p> <p>This relationship became insignificant when work environments were taken into account</p> <p>Hospitals with higher proportions of supplemental registered nurses had significantly worse work environments</p> | Medium         |
| Ancarani et al., 2009 | Analyse the relation between different organisational                                                                                                             | Quantitative, cross-sectional study | <b>Organisation climate:</b><br>Interviews based on the Competing Value Framework                                                                                                                                                                                                                             | 1,018 patients; 625 medical staff (470 nurses and 155 physicians) | 47 wards across seven hospitals; Italy | An organisational model climate accentuating openness, change and innovation and a model emphasising cohesion                                                                                                                                                                                                                                                                                  | High           |

| Study                 | Study objective(s)                                                                                                                                                       | Study design                        | Measures                                                                                                                                                                                                                 | Participants; Duration                                                                   | Context; Setting                    | Key findings                                                                                                                                                                                                                                                                           | Quality rating |
|-----------------------|--------------------------------------------------------------------------------------------------------------------------------------------------------------------------|-------------------------------------|--------------------------------------------------------------------------------------------------------------------------------------------------------------------------------------------------------------------------|------------------------------------------------------------------------------------------|-------------------------------------|----------------------------------------------------------------------------------------------------------------------------------------------------------------------------------------------------------------------------------------------------------------------------------------|----------------|
|                       | climate models and patient satisfaction                                                                                                                                  |                                     | <b>Patient outcome(s):</b><br>Interviews based on SERVQUAL instrument, measuring consumer expectations and perceptions of a service                                                                                      | Data collected November 2007-May 2009                                                    |                                     | and workers' morale were positively related to patient satisfaction, whereas a model based on managerial control where negatively associated with patient satisfaction<br><br>Ward organisational climate significantly positively affected patient perceptions of the quality of care |                |
| Ancarani et al., 2011 | Test a model in which the ward manager's orientation towards a given organisational climate contributes to determine the climate perceived by medical and nursing staff. | Quantitative, cross-sectional study | <b>Organisational climate:</b><br>Organizational Climate Measure (OCM)<br><br><b>Patient outcome(s):</b><br>Questionnaire based on the SERVQUAL instrument, measuring consumer expectations and perceptions of a service | 57 managers; 621 nurses; 277 physicians; 1,598 patients.<br><br>Data collected 2007-2009 | 57 wards across 10 hospitals; Italy | Ward managers' Human Relations climate orientation is positively related to patient satisfaction                                                                                                                                                                                       | High           |

| Study                | Study objective(s)                                                                                                                                                | Study design                        | Measures                                                                                                                                                                                                                                                                                                                                                                                                                                                                                                                                                                     | Participants; Duration                                                                                                                                        | Context; Setting                           | Key findings                                                                                                                                                                            | Quality rating |
|----------------------|-------------------------------------------------------------------------------------------------------------------------------------------------------------------|-------------------------------------|------------------------------------------------------------------------------------------------------------------------------------------------------------------------------------------------------------------------------------------------------------------------------------------------------------------------------------------------------------------------------------------------------------------------------------------------------------------------------------------------------------------------------------------------------------------------------|---------------------------------------------------------------------------------------------------------------------------------------------------------------|--------------------------------------------|-----------------------------------------------------------------------------------------------------------------------------------------------------------------------------------------|----------------|
|                      | Test whether this, in turn, has an impact on patient satisfaction                                                                                                 |                                     |                                                                                                                                                                                                                                                                                                                                                                                                                                                                                                                                                                              |                                                                                                                                                               |                                            |                                                                                                                                                                                         |                |
| Ansmann et al., 2014 | Identify associations between hospital structures, physicians' social resources as well as job demands and control and patients perceived support from physicians | Quantitative, cross-sectional study | <p><b>Work environment:</b> Social capital measured by a six-item scale developed by Pfaff et al., 2004; Social support from colleagues measured using an adaptation of the original Caplan scales by Udris and Riemann; Job Content Questionnaire; Leadership survey measuring surgery volume and the number of hospitals constituting the breast cancer centre</p> <p><b>Patient outcome(s):</b> Three item questionnaire designed by authors assessing patients' perceptions of the support provided by physicians to help them cope with their illness and treatment</p> | <p>348 physicians; 108 leadership positions; 1,844 patients</p> <p>Physician survey November 2010-March 2011</p> <p>Leadership survey July-September 2010</p> | 35 breast cancer centre hospitals; Germany | Patients felt better supported by their physicians in hospitals with high social capital, a high percentage of permanently employed physicians, and less physically strained physicians | High           |



| Study                    | Study objective(s)                                                                                                                                                                                                                                    | Study design                        | Measures                                                                                                                                                                                                                                       | Participants; Duration                                                                                                                     | Context; Setting                                                       | Key findings                                                                                        | Quality rating |
|--------------------------|-------------------------------------------------------------------------------------------------------------------------------------------------------------------------------------------------------------------------------------------------------|-------------------------------------|------------------------------------------------------------------------------------------------------------------------------------------------------------------------------------------------------------------------------------------------|--------------------------------------------------------------------------------------------------------------------------------------------|------------------------------------------------------------------------|-----------------------------------------------------------------------------------------------------|----------------|
| Arnetz and Arnetz, 1996  | Develop a reliable and valid instrument, to determine the predictors of patients' ratings of quality and to measure patient satisfaction at two points in time to determine whether patient ratings change following a quality improvement initiative | Quantitative, interventional study  | <p><b>Work environment:</b><br/>Questionnaire assessing patients' perceptions of quality of care and staff work environment</p> <p><b>Patient outcome(s):</b><br/>Questionnaire assessing overall patient satisfaction with pain treatment</p> | <p>1,834 patients (1994); 2,499 patients (1995); unspecified numbers of hospital staff</p> <p>Data collected August 1994-November 1995</p> | One hospital, Sweden                                                   | Perceived work environment was a significant predictor for a positive overall patient quality grade | Medium         |
| Ausserhofer et al., 2013 | Explore the relationship between patient safety climate and patient                                                                                                                                                                                   | Quantitative, cross-sectional study | <p><b>Work environment:</b><br/>Safety Organizing Scale; Practice Environment Scale of the Nursing Work Index (PES-NWI); Basel Extent of Rationing of</p>                                                                                      | <p>1,633 RNs; 997 patients</p> <p>Data collected October 2009-June 2010</p>                                                                | 132 surgical, medical and mixed surgical-medical units across 35 acute | Patient safety climate was not found to be a significant predictor of patient satisfaction          | High           |

| Study                     | Study objective(s)                                                                                                                             | Study design                     | Measures                                                                                                                                                                                                                                                          | Participants; Duration                                                                                                                                                                                                 | Context; Setting                                            | Key findings                                                                                                                                                                                                                                                                                            | Quality rating |
|---------------------------|------------------------------------------------------------------------------------------------------------------------------------------------|----------------------------------|-------------------------------------------------------------------------------------------------------------------------------------------------------------------------------------------------------------------------------------------------------------------|------------------------------------------------------------------------------------------------------------------------------------------------------------------------------------------------------------------------|-------------------------------------------------------------|---------------------------------------------------------------------------------------------------------------------------------------------------------------------------------------------------------------------------------------------------------------------------------------------------------|----------------|
|                           | outcomes in Swiss acute care hospitals, adjusting for major organisational variables                                                           |                                  | Nursing Care (BERNCA-R); nurse staffing level and skill mix items from the RN4CAST study nurse questionnaire<br><br><b>Patient outcome(s):</b><br>Patient satisfaction item from the Hospital Consumer Assessment of Healthcare Providers and Systems             |                                                                                                                                                                                                                        | care hospitals; Switzerland                                 |                                                                                                                                                                                                                                                                                                         |                |
| Barsade and O'Neill, 2014 | Examine the influence of a culture of compassionate love, on outcomes for employees, residents in a long-term care setting, and their families | Quantitative, longitudinal study | <b>Organisational culture:</b><br>Culture of Companionate Love Scale<br><br><b>Patient outcome(s):</b><br>Questionnaires measuring mood, satisfaction and quality of life; medical database records of weight gain, emergency room transfers, and pressure ulcers | 185 employees (certified nursing assistants, nurses, social workers, physicians, food service workers, and employees and other employees); 108 residents; 42 family members of residents<br><br>Duration not specified | 13 units across three long-term care residential sites; USA | There was a significant positive association between companionate love culture, patient mood, quality of life, satisfaction, and fewer trips to the emergency room<br><br>There was no significant association between compassionate love culture and weight gain or lower incidence of pressure ulcers | Medium         |

| Study                | Study objective(s)                                                                                                                                                                                                                                                                       | Study design                        | Measures                                                                                                                                                                                                                                                                                                                     | Participants; Duration                                                                                                                                                                                                                | Context; Setting                                                                                    | Key findings                                                                                                                                                                                                                                                                                                                                                                                     | Quality rating |
|----------------------|------------------------------------------------------------------------------------------------------------------------------------------------------------------------------------------------------------------------------------------------------------------------------------------|-------------------------------------|------------------------------------------------------------------------------------------------------------------------------------------------------------------------------------------------------------------------------------------------------------------------------------------------------------------------------|---------------------------------------------------------------------------------------------------------------------------------------------------------------------------------------------------------------------------------------|-----------------------------------------------------------------------------------------------------|--------------------------------------------------------------------------------------------------------------------------------------------------------------------------------------------------------------------------------------------------------------------------------------------------------------------------------------------------------------------------------------------------|----------------|
| Benning et al., 2011 | Evaluation of the first phase of the Health Foundation's Safer Patients Initiative (SPI): organisational intervention that focused on improving the reliability of specific frontline care processes in designated clinical specialties and promoting organisational and cultural change | Mixed methods, interventional study | <p><b>Organisational culture:</b> Semi-structured interviews investigating understanding of and enthusiasm for the SPI1; NHS Staff Survey</p> <p><b>Patient outcome(s):</b> Errors and adverse events from case notes; mortality rates; patient satisfaction based on the National NHS Acute Inpatient Survey in England</p> | <p>Interviews: 60 senior/strategic staff; 47 ward staff</p> <p>Survey: 3,397 staff in hospitals enrolled in the intervention; 15,300 staff in control hospitals</p> <p>Case notes: 1,237 patients</p> <p>Data collected 2005-2006</p> | Four hospitals participating in the first phase of the SPI and 18 control hospitals; United Kingdom | <p>There was a small improvement in staff attitudes to organisational climate in intervention hospitals</p> <p>On a range of other measures and outcomes related to patient safety, there was no additive effect attributable to the SPI</p> <p>Survey of patients showed no significant differences apart from an increase in perception of cleanliness in favour of intervention hospitals</p> | High           |
| Borg et al., 2015    | Establish the applicability of the Hofstede survey tool to measure and quantify organisational                                                                                                                                                                                           | Quantitative, cross-sectional study | <p><b>Organisational culture:</b> Hofstede Survey Tool</p> <p><b>Patient outcome(s):</b> Methicillin resistant Staphylococcus aureus (MRSA) prevalence</p>                                                                                                                                                                   | <p>135 doctors and nurses</p> <p>Data collected July-August 2012</p>                                                                                                                                                                  | Intensive care departments of seven tertiary care hospitals; four European countries                | Hospitals with a history of consistently low prevalence of MRSA exhibited high scores for change facilitation and change readiness,                                                                                                                                                                                                                                                              | Low            |

| Study              | Study objective(s)                                                                                                                                                                       | Study design                        | Measures                                                                                                                                                                                                                                                             | Participants; Duration                                                                                                 | Context; Setting                           | Key findings                                                                                                                                                                          | Quality rating |
|--------------------|------------------------------------------------------------------------------------------------------------------------------------------------------------------------------------------|-------------------------------------|----------------------------------------------------------------------------------------------------------------------------------------------------------------------------------------------------------------------------------------------------------------------|------------------------------------------------------------------------------------------------------------------------|--------------------------------------------|---------------------------------------------------------------------------------------------------------------------------------------------------------------------------------------|----------------|
|                    | culture in healthcare settings, and attempt to evaluate any associations between Infection Prevention and Control (IPC) outcomes and organisational culture scores                       |                                     | identified from blood cultures                                                                                                                                                                                                                                       |                                                                                                                        |                                            | together with perceptions of trust.<br><br>Hospitals with high prevalence of MRSA exhibited low scores for change readiness and change facilitation, but high scores for job security |                |
| Bosch et al., 2008 | Test the introduction of the diabetes passport and assess to what extent important aspects of restructured care such as multidisciplinary teamwork and different types of organisational | Quantitative, cross-sectional study | <p><b>Team climate:</b> Team Climate Inventory</p> <p><b>Organisational culture:</b> Competing Values Framework</p> <p><b>Patient outcome(s):</b> Measures of quality of diabetes care and clinical patient characteristics from medical records and self-report</p> | 752 patients with Diabetes mellitus type II; 83 Dutch health care professionals<br><br>Data collected during 2003-2004 | 30 primary care practices; The Netherlands | None of the selected clinical patient outcomes demonstrated significant associations with team climate or culture.                                                                    | High           |

| Study                | Study objective(s)                                                                             | Study design                        | Measures                                                                                                                                                                             | Participants; Duration                                                                                                        | Context; Setting               | Key findings                                                                                                                                                                                                                                                                                                                                      | Quality rating |
|----------------------|------------------------------------------------------------------------------------------------|-------------------------------------|--------------------------------------------------------------------------------------------------------------------------------------------------------------------------------------|-------------------------------------------------------------------------------------------------------------------------------|--------------------------------|---------------------------------------------------------------------------------------------------------------------------------------------------------------------------------------------------------------------------------------------------------------------------------------------------------------------------------------------------|----------------|
|                      | culture are associated with high quality diabetes care in small office-based general practices |                                     |                                                                                                                                                                                      |                                                                                                                               |                                |                                                                                                                                                                                                                                                                                                                                                   |                |
| Bradley et al., 2012 | Identify hospital strategies associated with lower RSMR (risk standardised mortality rates)    | Quantitative, cross-sectional study | <p><b>Organisational environment:</b> Questionnaire assessing the use of hospital strategies</p> <p><b>Patient outcome(s):</b> 30-day hospital RSMR based on hospital discharges</p> | <p>Unspecified number of patients hospitalised with acute myocardial infarction</p> <p>Data collected July 2005-June 2008</p> | 533 acute care hospitals; USA  | Key aspects of organisational environment (measured through hospital strategies) including effective communication and collaboration among groups, broad staff (cardiologist and pharmacist) presence and expertise, and a culture of creative problem solving and learning amongst cardiologists, were statistically associated with lower RSMRs | Medium         |
| Brewer, 2006         | Test the transtheoretical integration model (TIM)                                              | Quantitative, cross-sectional study | <b>Organisational culture:</b> Questionnaire measuring two hospital culture variables (group culture                                                                                 | 411 hospital employees (nurse and multi-                                                                                      | Four acute care hospitals; USA | A group-type culture (affiliation among all levels of hospital staff)                                                                                                                                                                                                                                                                             | High           |

| Study                | Study objective(s)                                                                                                                                                                                                                                           | Study design                        | Measures                                                                                                                                                                                                                                                                                                                          | Participants; Duration                                     | Context; Setting              | Key findings                                                                                                                                                                                        | Quality rating |
|----------------------|--------------------------------------------------------------------------------------------------------------------------------------------------------------------------------------------------------------------------------------------------------------|-------------------------------------|-----------------------------------------------------------------------------------------------------------------------------------------------------------------------------------------------------------------------------------------------------------------------------------------------------------------------------------|------------------------------------------------------------|-------------------------------|-----------------------------------------------------------------------------------------------------------------------------------------------------------------------------------------------------|----------------|
|                      | which proposes relationships among team-based phenomena and patient safety and resource-use outcome variables. TIM consists of Work Group Design, Hospital Culture, Positive Intrateam Process, Negative Intrateam Process, and Organisational Effectiveness |                                     | and developmental culture) through staff members' perceptions of hospital culture, work group design, and positive and negative team processes<br><br><b>Patient outcome(s):</b><br>Administrative quality reports recording patient falls with injury; financial reports measuring patient care unit expenses and length of stay | disciplinary team members)<br><br>Duration not specified   |                               | was inversely related to patient falls with injury<br><br>Developmental culture (innovation and risk taking) was positively related to patient falls with injury and total expenses per patient day |                |
| Carthon et al., 2015 | Examine the relationship between missing nursing care and                                                                                                                                                                                                    | Quantitative, cross-sectional study | <b>Work environment:</b><br>Practice Environment Scale of the Nursing Work Index (PES-NWI)                                                                                                                                                                                                                                        | 20,605 bedside nurses; 160,930 patients with heart failure | 419 acute care hospitals; USA | Before adjusting for patient and hospital characteristics, patients were more likely to experience a                                                                                                | Medium         |

| Study                   | Study objective(s)                                                                                           | Study design                        | Measures                                                                                                                                                                                                                                 | Participants; Duration                                                   | Context; Setting                            | Key findings                                                                                                                                                                                                                                                                      | Quality rating |
|-------------------------|--------------------------------------------------------------------------------------------------------------|-------------------------------------|------------------------------------------------------------------------------------------------------------------------------------------------------------------------------------------------------------------------------------------|--------------------------------------------------------------------------|---------------------------------------------|-----------------------------------------------------------------------------------------------------------------------------------------------------------------------------------------------------------------------------------------------------------------------------------|----------------|
|                         | hospital readmissions                                                                                        |                                     | <b>Patient outcome(s):</b> All-cause readmission within 30 days of discharge from an index admission for heart failure                                                                                                                   | Data collected 2005-2006                                                 |                                             | readmission when nursing care activities were more frequently missed (exception: pain management and timely medication administration)<br><br>Once adjusting for work environment, the effects of missing essential nursing was no longer a significant predictor of readmissions |                |
| Cassie and Cassie, 2012 | Examine the effect of organisational culture and climate on depressive symptoms among nursing home residents | Quantitative, cross-sectional study | <b>Organisational culture:</b> Organizational Social Context Scale<br><br><b>Patient outcome(s):</b> Minimum Data Set (Depression Rating Scale (DRS); Cognitive Performance Scale (CPS); Activities of Daily Living - Long Form (ADL-L)) | 1,114 employees; 5,497 residents<br><br>Data collected Jan 2007-May 2008 | 23 nursing homes; USA                       | Depressive symptoms were associated with two dimensions of organisational culture (proficiency and resistance), and three dimensions of climate (stress, engagement, and functionality)                                                                                           | High           |
| Chang and Mark, 2011    | Investigate whether learning                                                                                 | Quantitative, cross-                | <b>Work environment:</b> Questionnaires assessing work dynamics and                                                                                                                                                                      | 2,744 patients; 4,954 nurses                                             | 279 nursing units across 146 hospitals; USA | Significant negative relationship between learning climate and                                                                                                                                                                                                                    | Medium         |

| Study            | Study objective(s)                                                                          | Study design                        | Measures                                                                                                                                                                       | Participants; Duration                | Context; Setting                   | Key findings                                                                                                                                                                                                                                                                                                                                                                                                                               | Quality rating |
|------------------|---------------------------------------------------------------------------------------------|-------------------------------------|--------------------------------------------------------------------------------------------------------------------------------------------------------------------------------|---------------------------------------|------------------------------------|--------------------------------------------------------------------------------------------------------------------------------------------------------------------------------------------------------------------------------------------------------------------------------------------------------------------------------------------------------------------------------------------------------------------------------------------|----------------|
|                  | climate moderates the relationship between error producing conditions and medication errors | sectional study                     | <p>communication with physicians</p> <p><b>Learning climate:</b> Error Orientation Scale</p> <p><b>Patient outcome(s):</b> Medication error obtained from incident reports</p> | Data collected 2003-2004              |                                    | <p>medication errors (the more positive the learning environment was, the fewer medication errors occurred). However, there was no significant difference when the learning culture was average compared to when it was good</p> <p>Communication and experience were not associated with medication errors significantly</p> <p>Work dynamics was not significantly associated with medication errors, regardless of learning climate</p> |                |
| Cho et al., 2015 | Examine the effects of nurse staffing, work environment,                                    | Quantitative, cross-sectional study | <b>Work environment:</b> Practice Environment Scale of the Nursing Work Index (PES-NWI)                                                                                        | 1,024 staff; 76,036 surgical patients | 14 teaching hospitals; South Korea | Patient mortality was nearly 48% lower in hospitals with better nurse work                                                                                                                                                                                                                                                                                                                                                                 |                |



| Study                  | Study objective(s)                                                                                                                              | Study design                           | Measures                                                                                                                                                                                                                                       | Participants; Duration                                                                                                                                                                                                                                                                | Context; Setting            | Key findings                                                                                               | Quality rating |
|------------------------|-------------------------------------------------------------------------------------------------------------------------------------------------|----------------------------------------|------------------------------------------------------------------------------------------------------------------------------------------------------------------------------------------------------------------------------------------------|---------------------------------------------------------------------------------------------------------------------------------------------------------------------------------------------------------------------------------------------------------------------------------------|-----------------------------|------------------------------------------------------------------------------------------------------------|----------------|
|                        | and education on patient mortality                                                                                                              |                                        | <b>Patient outcome(s):</b><br>Patient discharge data recording patient characteristics and 30-day mortality rates                                                                                                                              | Data was collected January-December 2008                                                                                                                                                                                                                                              |                             | environments compared to hospitals with mixed or poor nurse work environments                              |                |
| Coustasse et al., 2008 | Analyse organisational culture in a community hospital in Texas to measure organisational culture change and its impact on patient satisfaction | Mixed methods, longitudinal case study | <b>Organisational culture:</b><br>Two sets of open-ended semi-structured interviews assessing organisational culture<br><br><b>Patient outcome(s):</b><br>Patient satisfaction scores and percentiles from Inpatient and Outpatient care areas | Semi-structured interviews: 162 Hospital staff<br><br>Culture interview: 29 members of the executive team<br><br>Surveys: 600 staff employees<br><br>Field experiment data collected January 2003-December 2003<br><br>Patient satisfaction data collected January 1998-December 2003 | One community hospital; USA | The shared vision of one subculture within the hospital was associated with increased patient satisfaction | Medium         |

| Study                   | Study objective(s)                                                                                                    | Study design                         | Measures                                                                                                                                                                                                                                               | Participants; Duration                                                                                                                                                                | Context; Setting                                            | Key findings                                                                                                                                                                                                                                                                                                                                                   | Quality rating |
|-------------------------|-----------------------------------------------------------------------------------------------------------------------|--------------------------------------|--------------------------------------------------------------------------------------------------------------------------------------------------------------------------------------------------------------------------------------------------------|---------------------------------------------------------------------------------------------------------------------------------------------------------------------------------------|-------------------------------------------------------------|----------------------------------------------------------------------------------------------------------------------------------------------------------------------------------------------------------------------------------------------------------------------------------------------------------------------------------------------------------------|----------------|
| Davenport et al., 2007  | Measure the impact of organisational climate safety factors (OCSFs) on risk-adjusted surgical morbidity and mortality | Quantitative, cross-sectional survey | <p><b>Organisational climate:</b> Safety Attitudes Questionnaire (SAQ)</p> <p><b>Patient outcome(s):</b> Risk-adjusted morbidity and mortality outcomes derived using the National Surgical Quality Improvement Program (NSQIP) dataset and models</p> | <p>6,083 attending and resident doctors, nurses, and other providers</p> <p>Models derived from data on more than 100,000 patients</p> <p>Data collected July 2003-September 2004</p> | 44 Veterans Affairs and eight academic medical centres; USA | <p>The OCSF measures of teamwork climate, safety climate, working conditions, recognition of stress effects, job satisfaction, and burnout were not correlated with risk-adjusted morbidity and mortality</p> <p>Reported levels of positive communication/collaboration with attending and resident doctors correlated with lower risk-adjusted morbidity</p> | High           |
| Dubois C-A et al., 2013 | Examine the associations of four distinct nursing care organisational models with patient safety outcomes             | Quantitative, cross sectional study  | <p><b>Organisational culture:</b> Four category variable representing nursing care organisational models</p> <p><b>Patient outcome(s):</b> Patient records reporting medication errors, falls, pneumonia, urinary tract infections, unjustified</p>    | <p>2,699 patients</p> <p>Data collected in a 30-day period, undocumented timeframe</p>                                                                                                | 11 hospitals; Canada                                        | After controlling for patient characteristics, patient risk of experiencing one or more events and of experience an event with consequences was significantly lower in the innovative professional and basic models compared to the                                                                                                                            | High           |

1  
2  
3  
4  
5  
6  
7  
8  
9  
10  
11  
12  
13  
14  
15  
16  
17  
18  
19  
20  
21  
22  
23  
24  
25  
26  
27  
28  
29  
30  
31  
32  
33  
34  
35  
36  
37  
38  
39  
40  
41  
42  
43  
44  
45  
46  
47

| Study                 | Study objective(s)                                                                                                                                  | Study design                                                    | Measures                                                                                                                                                                                                                                                                | Participants; Duration                                                                                                                                  | Context; Setting                                                                                                                                                 | Key findings                                                                                                                                                                                                                                                                                                           | Quality rating |
|-----------------------|-----------------------------------------------------------------------------------------------------------------------------------------------------|-----------------------------------------------------------------|-------------------------------------------------------------------------------------------------------------------------------------------------------------------------------------------------------------------------------------------------------------------------|---------------------------------------------------------------------------------------------------------------------------------------------------------|------------------------------------------------------------------------------------------------------------------------------------------------------------------|------------------------------------------------------------------------------------------------------------------------------------------------------------------------------------------------------------------------------------------------------------------------------------------------------------------------|----------------|
|                       |                                                                                                                                                     |                                                                 | restraints and pressure ulcers                                                                                                                                                                                                                                          |                                                                                                                                                         |                                                                                                                                                                  | <p>adaptive functional and basic functional models</p> <p>The lowest rates of negative outcomes were seen in the innovative professional model, characterised by richer staff skill mix, higher staffing intensity, and an environment with greater support of professional practice and investments in innovation</p> |                |
| Duffield et al., 2011 | What are the relationships among patient outcomes (OPSN (Outcomes Potentially Sensitive to Nursing) [consisting of 11 patient outcomes], falls, and | Quantitative, longitudinal and concurrent cross-sectional study | <p><b>Work environment:</b> The Area Health Services database; NWI-R; Nurse questionnaire measuring perceptions about the work environment and quality of care on the unit; Environmental Complexity Scale</p> <p><b>Patient outcome(s):</b> The Health Information</p> | Longitudinal study: 10,132,246 (4,964,924 matched to wards) ward stay records, 10,963,806 (2,675,428 matched to wards) nurse roster and payroll records | <p>Longitudinal study: Patient data from 80 hospitals; nursing staff data from 27 hospitals; Australia</p> <p>Cross-sectional study: 19 hospitals; Australia</p> | <p>Increased medication errors were associated with more nurses experiencing a threat of violence and tasks delayed</p> <p>Time-based medication errors were associated with perceptions of physical violence, emotional abuse, the amount of additional</p>                                                           | Medium         |

| Study                   | Study objective(s)                                                                                                                                                          | Study design                        | Measures                                                                                                                                                                                                                                                                                                            | Participants; Duration                                                                                                                                              | Context; Setting                | Key findings                                                                                                                                                                             | Quality rating |
|-------------------------|-----------------------------------------------------------------------------------------------------------------------------------------------------------------------------|-------------------------------------|---------------------------------------------------------------------------------------------------------------------------------------------------------------------------------------------------------------------------------------------------------------------------------------------------------------------|---------------------------------------------------------------------------------------------------------------------------------------------------------------------|---------------------------------|------------------------------------------------------------------------------------------------------------------------------------------------------------------------------------------|----------------|
|                         | medication errors), nurse skill mix, nursing workload, and the nursing work environment                                                                                     |                                     | Exchange (HIE) database; patient discharge data                                                                                                                                                                                                                                                                     | Data collected from 2000-2006<br><br>Cross-sectional study:<br>5,885 patient records, 22,497 patient-days, 13,442 nurse shifts<br><br>Data collected from 2004-2005 |                                 | time needed for patient care per shift, higher turnover of patients, and the proportion of patients waiting for a care facility                                                          |                |
| Estabrooks et al., 2011 | Assess the relative effects and importance of nursing education and skill mix, continuity of care, and quality of the work environment on 30-day mortality rate of patients | Quantitative, cross-sectional study | <b>Work environment:</b><br>Questionnaire assessing nursing skill mix, use of casual and temporary nurses, quality of care, job satisfaction, and educational preparation<br><br><b>Patient outcome(s):</b><br>Discharge abstracts reporting patient information (age, sex, vital status at discharge, and comorbid | 18,142 patients; 6,526 nurses<br><br>Data collected April 1998-March 1999                                                                                           | 49 acute care hospitals; Canada | Factors associated with a lower patient mortality rate included high nurse education levels, richer skill mix, better nurse-physician relationship, less casual and temporary employment | High           |

| Study                   | Study objective(s)                                                                                                                                                                | Study design                     | Measures                                                                                                                                                                        | Participants; Duration                                                                                                                                                                                     | Context; Setting                                                       | Key findings                                                                                                                                                                                                                                                                                                                                                                                                                                                                            | Quality rating |
|-------------------------|-----------------------------------------------------------------------------------------------------------------------------------------------------------------------------------|----------------------------------|---------------------------------------------------------------------------------------------------------------------------------------------------------------------------------|------------------------------------------------------------------------------------------------------------------------------------------------------------------------------------------------------------|------------------------------------------------------------------------|-----------------------------------------------------------------------------------------------------------------------------------------------------------------------------------------------------------------------------------------------------------------------------------------------------------------------------------------------------------------------------------------------------------------------------------------------------------------------------------------|----------------|
|                         | (after adjusting for institutional factors and patient characteristics)                                                                                                           |                                  | conditions, and primary diagnosis)                                                                                                                                              |                                                                                                                                                                                                            |                                                                        |                                                                                                                                                                                                                                                                                                                                                                                                                                                                                         |                |
| Estabrooks et al., 2015 | Examine the influence of organisational context on symptom burden and to compare symptom burden in the last year of life between nursing home residents with and without dementia | Quantitative, longitudinal study | <p><b>Organisational environment:</b> In-person interviews using the Alberta Content Tool</p> <p><b>Patient outcome(s):</b> Resident Assessment Instrument-Minimum Data Set</p> | <p>3,647 residents (2,635 with dementia and 1,012 without); 1381 front-line care</p> <p>Organisational environment data collected July 2009-June 2010</p> <p>Patient outcomes data collected 2008-2012</p> | 36 nursing homes (including both high and low care facilities); Canada | <p>Symptom burden at end of life differs between low- and high-context facilities</p> <p>Residents of high-context facilities had longer average length of stay, more unstable health and aggressive and challenging behaviour, and higher prevalence of dementia and delirium, compared to low-context facilities</p> <p>The prevalence of dyspnea, pain, urinary tract infections, cancer diagnosis and use of antipsychotics without a diagnosis of psychosis was lower in high-</p> | High           |

| Study                   | Study objective(s)                                                                | Study design                        | Measures                                                                                                                                                                     | Participants; Duration                                                                                                                                      | Context; Setting                                                              | Key findings                                                                                                                                                                                                                                                                                                                                                                                                                                              | Quality rating |
|-------------------------|-----------------------------------------------------------------------------------|-------------------------------------|------------------------------------------------------------------------------------------------------------------------------------------------------------------------------|-------------------------------------------------------------------------------------------------------------------------------------------------------------|-------------------------------------------------------------------------------|-----------------------------------------------------------------------------------------------------------------------------------------------------------------------------------------------------------------------------------------------------------------------------------------------------------------------------------------------------------------------------------------------------------------------------------------------------------|----------------|
| Fan et al., 2016        | Evaluate the association between safety culture and surgical site infection (SSI) | Quantitative, cross-sectional study | <p><b>Safety culture:</b> Hospital Survey on Patient Safety Culture (HSOPS)</p> <p><b>Patient outcome(s):</b> Postoperative colon surgery SSI data reported by hospitals</p> | <p>1,926 personnel from surgical units</p> <p>Safety culture data collected November 2012-December 2013</p> <p>SSI data collected January-December 2013</p> | Seven hospitals; USA                                                          | <p>context facilities</p> <p>Ten of the 12 safety culture dimensions were associated with colon SSI rate (perceptions of patient safety, teamwork across units, organisational learning, feedback and communication about error, management support for patient safety, teamwork within units, communication openness, supervisor/manager expectations and actions promoting safety, non-punitive response to error and frequency of events reported)</p> | Medium         |
| Fedorowsky et al., 2015 | Assess the association between organisational culture and health care workers'    | Quantitative, cross-sectional study | <b>Organisational culture:</b> Questionnaire assessing staff engagement, overwhelmed/stress-chaos, hospital leadership, health care workers' knowledge, attitudes, and       | 268 health care workers (registered/academic nurses, practical nurses/auxiliary staff, physicians,                                                          | One Post-acute care facility (PACF) and one acute care hospital (ACH); Israel | The organisational culture factor known as staff engagement was negatively correlated with CRE acquisition rate                                                                                                                                                                                                                                                                                                                                           | Medium         |

| Study                | Study objective(s)                                                                                                           | Study design                        | Measures                                                                                                                                                                                                    | Participants; Duration                                                                                                                                                                                                            | Context; Setting            | Key findings                                                                                                                                                                                                   | Quality rating |
|----------------------|------------------------------------------------------------------------------------------------------------------------------|-------------------------------------|-------------------------------------------------------------------------------------------------------------------------------------------------------------------------------------------------------------|-----------------------------------------------------------------------------------------------------------------------------------------------------------------------------------------------------------------------------------|-----------------------------|----------------------------------------------------------------------------------------------------------------------------------------------------------------------------------------------------------------|----------------|
|                      | attitudes, knowledge, practices, and CRE (Carbapenem-Resistant Enterobacteriaceae) acquisition rates                         |                                     | practices regarding CRE prevention<br><br><b>Patient outcome(s):</b> CRE acquisition rates from the Israeli National Infection Prevention Center                                                            | and paramedical staff, e.g., radiology technicians and physiotherapists<br><br>Organisational culture questionnaire distributed in January-February 2013<br><br>CRE acquisition rates obtained from January-December 2013 records |                             | Overwhelmed/stress-chaos was positively correlated with CRE acquisitions<br><br>Hospital leadership showed no significant correlation with CRE acquisition in either contexts                                  |                |
| Gardner et al., 2007 | Examine the relationships between staff nurses' perceptions of dialysis work environments, nurses' intentions to leave their | Quantitative, cross-sectional study | <b>Work environment:</b> Practice Environment Scale of the Nursing Work Index (PES-NWI)<br><br><b>Patient outcome(s):</b> Dialysis facility patient satisfaction survey; Number of patient hospitalisations | 199 nurses<br><br>Duration not specified                                                                                                                                                                                          | 56 dialysis facilities; USA | Negative overall ratings of the dialysis work environment were significantly related to hospitalisations for patients on dialysis greater than 90 days<br><br>PES-NWI scores were not significantly related to | High           |

| Study                          | Study objective(s)                                                                                                                          | Study design                       | Measures                                                                                                                                                                                                                                                                                                              | Participants; Duration                                                                 | Context; Setting         | Key findings                                                                                                                                                                                                                                                                                                                                                                                                                         | Quality rating |
|--------------------------------|---------------------------------------------------------------------------------------------------------------------------------------------|------------------------------------|-----------------------------------------------------------------------------------------------------------------------------------------------------------------------------------------------------------------------------------------------------------------------------------------------------------------------|----------------------------------------------------------------------------------------|--------------------------|--------------------------------------------------------------------------------------------------------------------------------------------------------------------------------------------------------------------------------------------------------------------------------------------------------------------------------------------------------------------------------------------------------------------------------------|----------------|
|                                | current jobs, nurse turnover, patient satisfaction, and patient hospitalisation rates                                                       |                                    |                                                                                                                                                                                                                                                                                                                       |                                                                                        |                          | patient satisfaction scores                                                                                                                                                                                                                                                                                                                                                                                                          |                |
| Greenslade and Jimmieson, 2011 | Test the model that service climate would increase the effort and performance of nursing groups and, in turn, increase patient satisfaction | Qualitative, cross-sectional study | <p><b>Organisational climate:</b><br/>Global Service Climate Scale; questionnaire measuring the effort exerted on specific tasks and effort intensity for contextual performance; Technical Care Scale; Job-Task Support Scale</p> <p><b>Patient outcome(s):</b><br/>Questionnaire assessing patient satisfaction</p> | 156 nurses; 39 nurse unit managers (NUMs); 171 patients<br><br>Data collected May 2007 | Two hospitals; Australia | <p>Patient satisfaction was positively associated with nurses' perception that there was a positive service climate</p> <p>Perceptions of service climate were associated with task and contextual effort, suggesting that a positive climate motivates nurses to provide quality patient care. Nurses felt that they exerted more effort towards providing technical care than towards performing extra-role tasks for patients</p> | High           |



| Study                  | Study objective(s)                                                                                                                                                                                                                                                                      | Study design                        | Measures                                                                                                                                                                                                                                                                                      | Participants; Duration                                                                  | Context; Setting                      | Key findings                                                                                                                                                                                                                                                                                              | Quality rating |
|------------------------|-----------------------------------------------------------------------------------------------------------------------------------------------------------------------------------------------------------------------------------------------------------------------------------------|-------------------------------------|-----------------------------------------------------------------------------------------------------------------------------------------------------------------------------------------------------------------------------------------------------------------------------------------------|-----------------------------------------------------------------------------------------|---------------------------------------|-----------------------------------------------------------------------------------------------------------------------------------------------------------------------------------------------------------------------------------------------------------------------------------------------------------|----------------|
| Hallowell et al., 2016 | Examine the association of the neonatal intensive care unit (NICU) work environment, staffing levels, level of nurse education, lactation consultant availability, and nurse-reported breastfeeding support with very low birth weight (VLBW) infant receipt of human milk at discharge | Quantitative, longitudinal study    | <p><b>Work environment:</b> Practice Environment Scale of the Nursing Work Index (PES-NWI); nursing metrics e.g., staffing, education, and experience</p> <p><b>Patient outcome(s):</b> Rate of very low birth weight infants discharged on “any human milk” from hospitalisation records</p> | 5,614 nurses; 6,997 patients (very low weight birth infants)<br><br>Data collected 2008 | 97 neonatal intensive care units; USA | <p>Better nurse work environments and better educated nurses in US NICUs were associated with a higher provision of human milk for VLBW infants</p> <p>In NICUs where more infants receive breastfeeding support from nurses, more VLBW infants received human milk at the point of discharge to home</p> | High           |
| Hansen et al., 2011    | Define the relationship between hospital safety climate and readmission rates within 30                                                                                                                                                                                                 | Quantitative, cross-sectional study | <p><b>Organisational culture:</b> Patient Safety Climate in Healthcare Organizations (PSCO)</p> <p><b>Patient outcome(s):</b> Risk-standardised hospital</p>                                                                                                                                  | 36,375 employees (frontline staff, nurses, physicians and senior managers)              | 67 acute care hospitals; USA          | There was a significant positive association between lower safety climate and higher readmission rates for acute myocardial infarction (AMI) and                                                                                                                                                          | High           |

| Study              | Study objective(s)                                                                                                                                           | Study design                        | Measures                                                                                                                                                                                 | Participants; Duration                                                                                    | Context; Setting                    | Key findings                                                                                                                                                                                                                                                                                                    | Quality rating |
|--------------------|--------------------------------------------------------------------------------------------------------------------------------------------------------------|-------------------------------------|------------------------------------------------------------------------------------------------------------------------------------------------------------------------------------------|-----------------------------------------------------------------------------------------------------------|-------------------------------------|-----------------------------------------------------------------------------------------------------------------------------------------------------------------------------------------------------------------------------------------------------------------------------------------------------------------|----------------|
|                    | days following discharge                                                                                                                                     |                                     | readmission rates from Centers for Medicare and Medicaid Services (CMS)                                                                                                                  | Survey data collected July 2006-May 2007<br><br>Admission rate data collected 2008                        |                                     | heart failure (HF), but not pneumonia. Perceptions of frontline staff associated with readmission rates but not those of senior management<br><br>Physician and nurse perceptions of safety climate were associated with AMI and HF readmission rates, respectively, but senior management perceptions were not |                |
| Kelly et al., 2014 | Determine the extent to which variation in ICU nursing characteristics—staffing, work environment, education, and experience—is associated with mortality. A | Quantitative, cross-sectional study | <b>Organisational environment:</b> Two databases: University of Pennsylvania Multi-State Nursing Care and Patient Safety Study and the American Hospital Association (AHA) Annual Survey | 55,159 older adults on mechanical ventilation; 3,193 critical care nurses<br><br>Data collected 2006-2008 | 303 adult acute care hospitals; USA | Patients in critical care units with better nurse work environments experienced lower odds of 30-day mortality than those in worse nurse work environments                                                                                                                                                      | High           |

1  
2  
3  
4  
5  
6  
7  
8  
9  
10  
11  
12  
13  
14  
15  
16  
17  
18  
19  
20  
21  
22  
23  
24  
25  
26  
27  
28  
29  
30  
31  
32  
33  
34  
35  
36  
37  
38  
39  
40  
41  
42  
43  
44  
45  
46  
47

| Study                   | Study objective(s)                                                                                                                                                          | Study design                        | Measures                                                                                                                                                                                                                   | Participants; Duration                                 | Context; Setting              | Key findings                                                                                                                                                                                                                                                                                                | Quality rating |
|-------------------------|-----------------------------------------------------------------------------------------------------------------------------------------------------------------------------|-------------------------------------|----------------------------------------------------------------------------------------------------------------------------------------------------------------------------------------------------------------------------|--------------------------------------------------------|-------------------------------|-------------------------------------------------------------------------------------------------------------------------------------------------------------------------------------------------------------------------------------------------------------------------------------------------------------|----------------|
|                         | secondary result of this would be illuminating strategies to improve patient outcomes                                                                                       |                                     | Critical care nurses' reports; the Practice Environment Scale of the Nursing Work Index (PES-NWI)<br><br><b>Patient outcome(s):</b> The Medicare Provider Analysis and Review (MedPAR) database reporting 30-day mortality |                                                        |                               |                                                                                                                                                                                                                                                                                                             |                |
| Kutney-Lee et al., 2009 | Examine the contribution of nurses' work environments to patient satisfaction using national Hospital Consumer Assessment of Healthcare Providers and Systems (HCAHPS) data | Quantitative, cross-sectional study | <b>Work environment:</b> Practice Environment Scale of the Nursing Work Index (PES-NWI)<br><br><b>Patient outcome(s):</b> HCAHPS                                                                                           | 20,984 resident nurses<br><br>Data collected 2006-2009 | 430 acute care hospitals; USA | The nurse work environment was significantly related to all HCAHPS patient satisfaction measures<br><br>Patient-to-nurse workloads were significantly associated with patients' ratings and recommendation of the hospital to others, and with their satisfaction with the receipt of discharge information | Medium         |

| Study                   | Study objective(s)                                                                                                                                                                                                         | Study design                       | Measures                                                                                                                                                                                                                                                                                                                                                                                                                                                                                                                       | Participants; Duration                                                         | Context; Setting                                             | Key findings                                                                                                                                                                                                                                                                                                                                                                | Quality rating |
|-------------------------|----------------------------------------------------------------------------------------------------------------------------------------------------------------------------------------------------------------------------|------------------------------------|--------------------------------------------------------------------------------------------------------------------------------------------------------------------------------------------------------------------------------------------------------------------------------------------------------------------------------------------------------------------------------------------------------------------------------------------------------------------------------------------------------------------------------|--------------------------------------------------------------------------------|--------------------------------------------------------------|-----------------------------------------------------------------------------------------------------------------------------------------------------------------------------------------------------------------------------------------------------------------------------------------------------------------------------------------------------------------------------|----------------|
| Kutney-Lee et al., 2015 | Compare changes over time in surgical patient outcomes, nurse-reported quality, and nurse outcomes in a sample of hospitals that attained Magnet recognition between 1999 and 2007 with hospitals that remained non-Magnet | Quantitative, longitudinal study   | <p><b>Work environment:</b><br/>A binary variable measuring Magnetic status; Pennsylvania Registered Nurse Survey; Multi-State Nursing Care and Patient Safety Survey; The American Hospital Association (AHA) Annual Survey; Practice Environment Scale of the Nursing Work Index (PES-NWI)</p> <p><b>Patient outcome(s):</b><br/>Pennsylvania Health Care Cost Containment Council (PHC4) administrative discharge abstract files and death record files measuring 30-day surgical mortality and failure-to-rescue (FTR)</p> | 20,984 staff nurses; unspecified number of patients<br><br>Data collected 2007 | 136 hospitals (11 emerging Magnets and 125 non-Magnets); USA | <p>Emerging Magnet hospitals demonstrated markedly greater improvements over time on the PES-NWI overall score and all five subscales compared to hospitals that remained non-Magnet</p> <p>Emerging Magnet hospitals experienced significantly greater improvement 30-day surgical mortality and failure to rescue rates over time, compared to non-Magnetic hospitals</p> | Medium         |
| Larson et al., 2000     | Assess the impact of an intervention to change                                                                                                                                                                             | Quantitative, interventional study | <b>Organisational culture:</b><br>Handwashing frequency rates estimated from records of activation of                                                                                                                                                                                                                                                                                                                                                                                                                          | All staff in adult medical intensive care unit (MICU) and a neonatal           | Two hospitals (one intervention hospital, once               | Over a period of eight months, 860,567 soap dispensings were recorded, with                                                                                                                                                                                                                                                                                                 | High           |

1  
2  
3  
4  
5  
6  
7  
8  
9  
10  
11  
12  
13  
14  
15  
16  
17  
18  
19  
20  
21  
22  
23  
24  
25  
26  
27  
28  
29  
30  
31  
32  
33  
34  
35  
36  
37  
38  
39  
40  
41  
42  
43  
44  
45  
46  
47

| Study             | Study objective(s)                                                                                                                                                                                                                                                                           | Study design         | Measures                                                                                                                                                                       | Participants; Duration                                   | Context; Setting          | Key findings                                                                                                                                                                                                                                                   | Quality rating |
|-------------------|----------------------------------------------------------------------------------------------------------------------------------------------------------------------------------------------------------------------------------------------------------------------------------------------|----------------------|--------------------------------------------------------------------------------------------------------------------------------------------------------------------------------|----------------------------------------------------------|---------------------------|----------------------------------------------------------------------------------------------------------------------------------------------------------------------------------------------------------------------------------------------------------------|----------------|
|                   | organisational culture on frequency of staff handwashing (as measured by counting devices inserted into soap dispensers on four critical care units) and nosocomial infections associated with methicillin-resistant Staphylococcus aureus (MRSA) and vancomycin-resistant enterococci (VRE) |                      | soap dispensers in study units<br><br><b>Patient outcome(s):</b> Rates of nosocomial infections with MRSA and VRE. Data collected by infection control staff in each hospital. | intensive care unit (NICU)<br><br>Duration not specified | comparison hospital); USA | significant improvements in the study hospital after six months of follow-up. There were no significant differences in rates of MRSA between the two hospitals, but rates of VRE were significantly reduced in the intervention hospital during implementation |                |
| Ma and Park, 2015 | Examine the effects of work environment                                                                                                                                                                                                                                                      | Quantitative, cross- | <b>Work environment:</b><br>Practice Environment                                                                                                                               | 33,845 registered nurses                                 | 373 hospitals; USA        | Units in Magnet hospitals had lower rates of pressure ulcers and                                                                                                                                                                                               | High           |

| Study           | Study objective(s)                                                                                                                                                                  | Study design                        | Measures                                                                                                                                                                                                                                                                                                | Participants; Duration                                                                      | Context; Setting   | Key findings                                                                                                                                                                                                                                                                                              | Quality rating |
|-----------------|-------------------------------------------------------------------------------------------------------------------------------------------------------------------------------------|-------------------------------------|---------------------------------------------------------------------------------------------------------------------------------------------------------------------------------------------------------------------------------------------------------------------------------------------------------|---------------------------------------------------------------------------------------------|--------------------|-----------------------------------------------------------------------------------------------------------------------------------------------------------------------------------------------------------------------------------------------------------------------------------------------------------|----------------|
|                 | on patient outcomes at the unit level while adjusting for the influence on hospital-level organisational factors such as Magnet status                                              | sectional study                     | Scale of the Nursing Work Index (PES-NWI)<br><br><b>Patient outcome(s):</b><br>Hospital-acquired pressure ulcer rates from the National Database of Nursing Quality Indicators (NDNQI)                                                                                                                  | Data collected 2013                                                                         |                    | better work environments<br><br>Hospital Magnet status and work environments were significantly associated with pressure ulcer rates after controlling for unit level covariates                                                                                                                          |                |
| Ma et al., 2015 | Determine the relationships between hospital nursing factors—nurse work environment, nurse staffing, and nurse education—and 30-day readmissions among Medicare patients undergoing | Quantitative, cross-sectional study | <b>Work environment:</b> Two databases: University of Pennsylvania Multi-State Nursing Care and Patient Safety Study and the American Hospital Association (AHA) Annual Survey<br><br><b>Patient outcome(s):</b> Medicare Provider and Analysis Review File (MedPAR) measuring 30-day readmission rates | 220,914 Medicare surgical patients; 25,082 nurses<br><br>Data collected July 2006-June 2007 | 258 hospitals; USA | Patients cared for in hospitals with better nurse work environments had lower odds of readmission, independent of nurse staffing levels. Administrative support to nursing practice and nurse-physician relations were two main attributes of the work environment that were associated with readmissions | High           |

| Study              | Study objective(s)                                                                                                                           | Study design                                                  | Measures                                                                                                                                                                                                                                                                                            | Participants; Duration                                                                                                                 | Context; Setting                                                                          | Key findings                                                                                                                                                                                                                                                                                     | Quality rating |
|--------------------|----------------------------------------------------------------------------------------------------------------------------------------------|---------------------------------------------------------------|-----------------------------------------------------------------------------------------------------------------------------------------------------------------------------------------------------------------------------------------------------------------------------------------------------|----------------------------------------------------------------------------------------------------------------------------------------|-------------------------------------------------------------------------------------------|--------------------------------------------------------------------------------------------------------------------------------------------------------------------------------------------------------------------------------------------------------------------------------------------------|----------------|
|                    | general, orthopaedic, and vascular surgery                                                                                                   |                                                               |                                                                                                                                                                                                                                                                                                     |                                                                                                                                        |                                                                                           |                                                                                                                                                                                                                                                                                                  |                |
| Maben et al., 2012 | Examine the links between staff experience of work and patient experience of care in a 'Medicine for Older People' (MfOP) service in England | Mixed-methods, cross-sectional study                          | <p><b>Organisational climate:</b> Questionnaire assessing organisational and local climate</p> <p><b>Patient outcome(s):</b> Patient Evaluation of Emotional Care During Hospitalisation (PEECH); short-form Picker Instrument; additional items from the longer UK NHS National Patient Survey</p> | <p>Survey: 66 staff; 26 patients</p> <p>Interview: 18 staff; 18 patients and carers</p> <p>Data collected January 2010-August 2010</p> | A dedicated service for older people situated in a large acute teaching hospital; England | <p>Patients experienced more varied and unpredictable nursing care on those wards with a poor local work climate for staff</p> <p>Emotional labour involved in being a patient was greater in poor care climates where the quality of care was unpredictable and patient experience variable</p> | Medium         |
| Mahl et al., 2015  | Evaluate the association of perceived organisational culture and quality improvement with the outcomes of                                    | Quantitative, combined cross-sectional and longitudinal study | <p><b>Organisational culture:</b> Quality Improvement Implementation Survey (QIIS)</p> <p><b>Patient outcome(s):</b> Survival without major morbidity from patient records</p>                                                                                                                      | <p>1,133 health care professional; 1,028 extremely pre-term infants</p> <p>Data collected April 2008-March 2009</p>                    | 18 neonatal ICUs; Canada                                                                  | <p>Higher group culture scores were associated with significantly lower rates of survival without major morbidity</p> <p>Higher hierarchical culture and higher quality improvement</p>                                                                                                          | High           |

| Study               | Study objective(s)                                                                                                                                                                                                                                 | Study design                        | Measures                                                                                                                                                                                                              | Participants;<br>Duration                                 | Context; Setting   | Key findings                                                                                                                                                                                                                                                                                                                                                                                                                                                                 | Quality rating |
|---------------------|----------------------------------------------------------------------------------------------------------------------------------------------------------------------------------------------------------------------------------------------------|-------------------------------------|-----------------------------------------------------------------------------------------------------------------------------------------------------------------------------------------------------------------------|-----------------------------------------------------------|--------------------|------------------------------------------------------------------------------------------------------------------------------------------------------------------------------------------------------------------------------------------------------------------------------------------------------------------------------------------------------------------------------------------------------------------------------------------------------------------------------|----------------|
|                     | infants admitted to level III NICUs in Canada                                                                                                                                                                                                      |                                     |                                                                                                                                                                                                                       |                                                           |                    | scores were associated with higher rates of survival without major morbidity                                                                                                                                                                                                                                                                                                                                                                                                 |                |
| Mardon et al., 2010 | Examine relationships between the Agency for Healthcare Research and Quality's (AHRQ) Hospital Survey of Patient Safety Culture and rates of in-hospital complications and adverse events as measured by the AHRQ Patient Safety Indicators (PSIs) | Quantitative, cross-sectional study | <p><b>Safety culture:</b> The Agency for Healthcare Research and Quality (AHRQ) Hospital Survey on Patient Safety Culture (HSOPS)</p> <p><b>Patient outcome(s):</b> Selected AHRQ Patient Safety Indicators (PSI)</p> | 56,480 hospital employees<br><br>Data collected 2004-2006 | 179 hospitals; USA | Hospitals with higher patient safety culture scores tended to have lower rates of documented adverse events:<br>12/15 HSOPS variables were negatively correlated with PSIs. After controlling for hospital characteristics, seven HSOPS (frequency of events reported, handoffs and transitions, organisational learning—continuous improvement, staffing, teamwork across units, teamwork within units, HSOP composite average) remained statistically correlated with PSIs | High           |



| Study                   | Study objective(s)                                                | Study design                        | Measures                                                                                                                                                                                                                                                                         | Participants; Duration                                            | Context; Setting   | Key findings                                                                                                                                                                                                                                                                                                                                                                                                                                                          | Quality rating |
|-------------------------|-------------------------------------------------------------------|-------------------------------------|----------------------------------------------------------------------------------------------------------------------------------------------------------------------------------------------------------------------------------------------------------------------------------|-------------------------------------------------------------------|--------------------|-----------------------------------------------------------------------------------------------------------------------------------------------------------------------------------------------------------------------------------------------------------------------------------------------------------------------------------------------------------------------------------------------------------------------------------------------------------------------|----------------|
| McHugh and Ma, 2013     | Understand how the nursing care environment affects readmissions  | Quantitative, cross-sectional study | <p><b>Work environment:</b> Practice Environment Scale of the Nursing Work Index (PES-NWI); nurse staffing levels; nurse educational attainment</p> <p><b>Patient outcome(s):</b> Data on index admissions and readmissions obtained from state discharge abstract databases</p> | <p>375,681 patients; 20,585 nurses</p> <p>Data collected 2006</p> | 412 hospitals; USA | <p>Care in a hospital with a good versus poor work environment was associated with 7% lower odds of 30-day readmission for heart failure patients, 6% lower odds for acute myocardial infarction patients and 10% lower odds for pneumonia patients</p> <p>The odds of readmission was 4% lower for heart failure, 3% lower for acute myocardial infarction and 6% lower for pneumonia patients cared for in a hospital with a mixed versus poor work environment</p> | High           |
| Meraviglia et al., 2008 | Assist rural or small hospitals (average daily census < 100) with | Quantitative, interventional study  | <b>Work environment:</b> Nursing Work Index-Revised (NWI-R)                                                                                                                                                                                                                      | <p>1,150 nurses</p> <p>Duration not specified</p>                 | 30 hospitals; USA  | There were positive changes in the nurses' perception of their work environment (indicating that that the                                                                                                                                                                                                                                                                                                                                                             | Medium         |

1  
2  
3  
4  
5  
6  
7  
8  
9  
10  
11  
12  
13  
14  
15  
16  
17  
18  
19  
20  
21  
22  
23  
24  
25  
26  
27  
28  
29  
30  
31  
32  
33  
34  
35  
36  
37  
38  
39  
40  
41  
42  
43  
44  
45  
46  
47

| Study                  | Study objective(s)                                                                                                                                          | Study design                        | Measures                                                                                                                                                                                                                                     | Participants; Duration                                                                                                                                 | Context; Setting                                      | Key findings                                                                                                                                                                      | Quality rating |
|------------------------|-------------------------------------------------------------------------------------------------------------------------------------------------------------|-------------------------------------|----------------------------------------------------------------------------------------------------------------------------------------------------------------------------------------------------------------------------------------------|--------------------------------------------------------------------------------------------------------------------------------------------------------|-------------------------------------------------------|-----------------------------------------------------------------------------------------------------------------------------------------------------------------------------------|----------------|
|                        | implementing 12 nurse friendly criteria into the policies and practices of the hospital to create a positive work environment                               |                                     | <b>Patient outcome(s):</b><br>Hospital reported prevalence of pressure ulcers, patient falls, and hospital-acquired pneumonia and urinary tract infections                                                                                   |                                                                                                                                                        |                                                       | intervention successfully improved organisational culture)<br><br>Quality of care improved at participating hospitals, as measured by the nurse-sensitive quality indicators (QI) |                |
| Morris A et al., 2007  | Examine the effects of organisational culture and climate, as well as individual characteristics, on outcomes of care for adults with severe mental illness | Quantitative, longitudinal study    | <b>Organisational culture and climate:</b><br>Questionnaire assessing organisational culture and climate<br><br><b>Patient outcome(s):</b><br>Quality of Life (QOL) index; SF-36; Medicaid claims data; Clinician diagnoses using the DSM IV | 424 Patients with chronic mental illness; 274 administrators and health workers<br><br>Data collected over three years; collection dates not specified | 14 Community Mental Health Organizations (CMHOs); USA | Organisational culture and climate were strong predictors of perceived improvements in physical and mental health status over time, but were not associated with changes in QOL   | High           |
| Nasirpour et al., 2010 | Determine the relationship of Centralisation and organisational culture and                                                                                 | Quantitative, cross-sectional study | <b>Organisational culture:</b><br>Robbin's organizational culture questionnaire                                                                                                                                                              | 441 personnel<br><br>Data collected 2007                                                                                                               | 13 hospitals; Iran                                    | No significant correlation was observed between organisational culture and hospital performance indexes                                                                           | Low            |

| Study                 | Study objective(s)                                                                                                  | Study design                     | Measures                                                                                                                                                                                                    | Participants; Duration                                                                            | Context; Setting     | Key findings                                                                                                                                                                                                                                                                                                                                                                                                    | Quality rating |
|-----------------------|---------------------------------------------------------------------------------------------------------------------|----------------------------------|-------------------------------------------------------------------------------------------------------------------------------------------------------------------------------------------------------------|---------------------------------------------------------------------------------------------------|----------------------|-----------------------------------------------------------------------------------------------------------------------------------------------------------------------------------------------------------------------------------------------------------------------------------------------------------------------------------------------------------------------------------------------------------------|----------------|
|                       | performance indexes in Teaching Hospitals affiliated to Tehran University of Medical Sciences                       |                                  | <b>Patient outcome(s):</b><br>Performance indexes (average length of stay, inpatient bed occupancy ratio, rate of admissions per active bed, net death rate and ratio of surgical operations to inpatients) |                                                                                                   |                      |                                                                                                                                                                                                                                                                                                                                                                                                                 |                |
| Nowinski et al., 2007 | Monitor changes in organisational culture, continuous quality improvement (QI), maturity and QI indicators overtime | Quantitative, longitudinal study | <b>Organisational culture:</b><br>Culture and Quality Questionnaire (CQQ)<br><br><b>Patient outcome(s):</b> Press Ganey patient satisfaction survey; multiple standard quality indicators                   | 621 employees at Baseline and 471 employees at Time 2<br><br>Data collected March 2003-March 2006 | Three hospitals; USA | Several strong correlations were found between changes in culture score and changes in quality indicators at the three facilities. Appropriate discharge of patients with chest pain was negatively correlated with developmental culture; use of antibiotics within four hours of admission was positively associated with rational culture and quality management and negatively related to group culture and | Medium         |

| Study                   | Study objective(s)                                                                        | Study design                        | Measures                                                                                                                                                                                                                                                                    | Participants; Duration                               | Context; Setting                                          | Key findings                                                                                                                                                                                                                        | Quality rating |
|-------------------------|-------------------------------------------------------------------------------------------|-------------------------------------|-----------------------------------------------------------------------------------------------------------------------------------------------------------------------------------------------------------------------------------------------------------------------------|------------------------------------------------------|-----------------------------------------------------------|-------------------------------------------------------------------------------------------------------------------------------------------------------------------------------------------------------------------------------------|----------------|
|                         |                                                                                           |                                     |                                                                                                                                                                                                                                                                             |                                                      |                                                           | human resource utilisation; and patient satisfaction was positively correlated with group culture and negatively correlated with rational culture                                                                                   |                |
| Prezerakos et al., 2015 | Investigate the correlation between haemodialysis work environment and patients' outcomes | Quantitative, cross-sectional study | <p><b>Work environment:</b> Practice Environment Scale of the Nursing Work Index (PES-NWI)</p> <p><b>Patient outcome(s):</b> Questionnaire assessing how often selected errors and adverse events have occurred under the nursing care during the previous three months</p> | 133 nurses<br>Data collected June-July 2012          | 11 hospital-based dialysis units; Greece                  | Hypotension, venous needle disconnection and patient falls were associated with non-favourable work environment<br><br>Hypoglycaemia, medication error and catheter-associated infections were not associated with work environment | High           |
| Purdy et al., 2010      | Determine impact of the work environment on patient care                                  | Quantitative, cross-sectional study | <b>Work environment:</b> Work Effectiveness Questionnaire (CWEQ-II); Work Group Characteristics Measure; Psychological                                                                                                                                                      | 679 nurses; 1,005 patients<br>Duration not specified | 61 medical and surgical units across 21 hospitals; Canada | Structural empowerment, mediated through group processes, significantly impacted a variety of patient outcomes including nurse-assessed                                                                                             | High           |

| Study              | Study objective(s)                                                                | Study design                        | Measures                                                                                                                                                                                                                                                                     | Participants; Duration                                                                     | Context; Setting                                                                               | Key findings                                                                                                                                                                                                                                                                            | Quality rating |
|--------------------|-----------------------------------------------------------------------------------|-------------------------------------|------------------------------------------------------------------------------------------------------------------------------------------------------------------------------------------------------------------------------------------------------------------------------|--------------------------------------------------------------------------------------------|------------------------------------------------------------------------------------------------|-----------------------------------------------------------------------------------------------------------------------------------------------------------------------------------------------------------------------------------------------------------------------------------------|----------------|
|                    |                                                                                   |                                     | Empowerment Questionnaire (PEQ)<br><br><b>Patient outcome(s):</b><br>Patient falls and nurse assessed risks, measured using an instrument developed by Sochalski (2001); Nursing Care Quality Questionnaire (PSNCQQ); Therapeutic Self-care Questionnaire-Acute Care Version |                                                                                            |                                                                                                | quality and risk as well as an objective measure of patient falls although no significant effect was found for variables assessed using the patient's perspective                                                                                                                       |                |
| Saame et al., 2011 | Outline the relationships between organisational culture and patient satisfaction | Quantitative, cross-sectional study | <b>Organisational culture:</b><br>Organisational Values Questionnaire (OVQ)<br><br><b>Patient outcome(s):</b><br>Patient satisfaction ratings                                                                                                                                | 456 medical and non-medical professionals<br><br>Data collected October 2005-February 2006 | One hospital (including two clinics with high patient satisfaction and four with low); Estonia | Clinics with high patient satisfaction did not score more than clinics with low patient satisfaction in terms of the Human Relations type<br><br>Clinics with high patient satisfaction were less oriented towards Rational Goal type values than clinics with low patient satisfaction | Medium         |

| Study                 | Study objective(s)                                                                                                                                                                     | Study design                        | Measures                                                                                                                                                                                                                                                                                                                                                                                  | Participants; Duration                                                                                   | Context; Setting                                                | Key findings                                                                                                                                                                                                                                                                                                                                                                            | Quality rating |
|-----------------------|----------------------------------------------------------------------------------------------------------------------------------------------------------------------------------------|-------------------------------------|-------------------------------------------------------------------------------------------------------------------------------------------------------------------------------------------------------------------------------------------------------------------------------------------------------------------------------------------------------------------------------------------|----------------------------------------------------------------------------------------------------------|-----------------------------------------------------------------|-----------------------------------------------------------------------------------------------------------------------------------------------------------------------------------------------------------------------------------------------------------------------------------------------------------------------------------------------------------------------------------------|----------------|
| Scotti et al., 2007   | Examine how a high-involvement approach to the work environment of healthcare employees may lead to exceptional service quality, satisfied patients, and ultimately to loyal customers | Mixed-methods cross-sectional study | <p><b>Work climate:</b><br/>Questionnaire assessing human resource practices, customer orientation and employee-perceived service quality based on pre-existing Veterans' Affairs Questionnaire</p> <p><b>Patient outcome(s):</b><br/>Questionnaire assessing customer perceived quality and customer satisfaction based on pre-existing Veterans Health Administration Questionnaire</p> | 59,464 employees; 212,874 respondents<br><br>Data collected 2001                                         | 113 Veterans Health Administration ambulatory care centres; USA | <p>High-performance work systems are linked to employee perceptions of their ability to deliver high-quality customer service, both directly and through their perceptions of customer orientation</p> <p>Employee perceptions of customer service are linked to customer perceptions of high-quality service</p> <p>Perceived service quality is linked with customer satisfaction</p> | High           |
| Shortell et al., 1995 | Examine the relationships between organisational culture, quality improvement processes and selected                                                                                   | Quantitative, cross-sectional study | <b>Organisational culture:</b><br>20-item questionnaire developed by Zammuto and Krakower (1991) assessing group culture, developmental culture, hierarchical culture, and rational culture scales                                                                                                                                                                                        | Continuous quality improvement and total quality management: an unspecified number of CEOs and person in | 61 hospitals; USA                                               | A participative, flexible, risk-taking organisational culture was significantly related to quality improvement implementation                                                                                                                                                                                                                                                           | Medium         |

| Study                 | Study objective(s)                                                                                                                                                   | Study design                     | Measures                                                                                                                                                                                                                                                                                                                                    | Participants; Duration                                                                                                                                                                      | Context; Setting                                                                                                       | Key findings                                                                                                                                                                                                                                                                                                    | Quality rating |
|-----------------------|----------------------------------------------------------------------------------------------------------------------------------------------------------------------|----------------------------------|---------------------------------------------------------------------------------------------------------------------------------------------------------------------------------------------------------------------------------------------------------------------------------------------------------------------------------------------|---------------------------------------------------------------------------------------------------------------------------------------------------------------------------------------------|------------------------------------------------------------------------------------------------------------------------|-----------------------------------------------------------------------------------------------------------------------------------------------------------------------------------------------------------------------------------------------------------------------------------------------------------------|----------------|
|                       | patient outcomes                                                                                                                                                     |                                  | <p><b>Patient outcome(s):</b> A patient outcome impact scale assessing improved patient outcomes, reduced errors and inappropriate treatment, increased patient satisfaction, and improved continuity of patient care</p>                                                                                                                   | <p>charge of quality assessment</p> <p>Organisational culture: 7,337 hospital staff</p> <p>Implementation: Approximately 50 respondents from per hospital</p> <p>Duration not specified</p> |                                                                                                                        | <p>Quality improvement implementation was significantly associated with greater perceived patient outcomes and human resource development, but not financial outcomes</p>                                                                                                                                       |                |
| Shortell et al., 2000 | Test impact of total quality management (TQM) and organisational culture on a comprehensive set of endpoints of care for coronary artery bypass graft surgery (CABG) | Quantitative, longitudinal study | <p><b>Organisational culture:</b> Previously validated 20-item questionnaire developed by Zammuto and Krakower (1991)</p> <p><b>Patient outcome(s):</b> CABG care endpoints (mortality, adverse outcome, clinical efficiency); Patient satisfaction questionnaire consisting of Patient Judgment System 24-item (PJS-24) questionnaire,</p> | <p>3,045 patients; an average of 54 staff per hospital</p> <p>Data collected 1995-1996</p>                                                                                                  | <p>16 nongovernmental, not-for-profit, short-term-care general service hospitals engaged in TQM interventions; USA</p> | <p>A supportive group culture was significantly associated with shorter postoperative intubation times, and higher patient physical and mental functional health status scores six months after CABG, but also with longer operating room times</p> <p>There was little effect of organisational culture on</p> | High           |

| Study               | Study objective(s)                                                                                          | Study design                        | Measures                                                                                                                                                                                          | Participants; Duration                                       | Context; Setting  | Key findings                                                                                                                                                                                                                                                                                                                                                                                                                                                     | Quality rating |
|---------------------|-------------------------------------------------------------------------------------------------------------|-------------------------------------|---------------------------------------------------------------------------------------------------------------------------------------------------------------------------------------------------|--------------------------------------------------------------|-------------------|------------------------------------------------------------------------------------------------------------------------------------------------------------------------------------------------------------------------------------------------------------------------------------------------------------------------------------------------------------------------------------------------------------------------------------------------------------------|----------------|
|                     |                                                                                                             |                                     | 'returning to home issues' items, and 'the needs of heart patients' items                                                                                                                         |                                                              |                   | multiple end-points of care for CABG patients                                                                                                                                                                                                                                                                                                                                                                                                                    |                |
| Singer et al., 2009 | Study the relationship between safety climate and safety performance using Patient Safety Indicators (PSIs) | Quantitative, cross-sectional study | <p><b>Safety climate:</b> Patient Safety Climate in Healthcare Organizations (PSCHO) 2004</p> <p><b>Patient outcome(s):</b> The Medicare Provider Analysis and Review (MEDPAR) File from 2005</p> | <p>18,223 hospital staff</p> <p>Data collected 2004-2005</p> | 91 hospitals; USA | <p>Higher levels of safety climate were associated with higher safety performance</p> <p>Hospitals in which personnel reported more problems with fear of shame and blame had significantly greater risk of experiencing PSIs</p> <p>Perceptions of higher safety climate overall among frontline personnel were associated with a relative increase in the risk of experiencing PSIs, but safety climate perceptions overall among senior managers were not</p> | High           |



| Study              | Study objective(s)                                                                                                      | Study design                        | Measures                                                                                                                                                                                                                                                                                                                                                                                                                                                                                                                                                                                                       | Participants; Duration                                   | Context; Setting                                       | Key findings                                                                                                                                                                                                                                                                                                                                                                                                                                                                                                   | Quality rating |
|--------------------|-------------------------------------------------------------------------------------------------------------------------|-------------------------------------|----------------------------------------------------------------------------------------------------------------------------------------------------------------------------------------------------------------------------------------------------------------------------------------------------------------------------------------------------------------------------------------------------------------------------------------------------------------------------------------------------------------------------------------------------------------------------------------------------------------|----------------------------------------------------------|--------------------------------------------------------|----------------------------------------------------------------------------------------------------------------------------------------------------------------------------------------------------------------------------------------------------------------------------------------------------------------------------------------------------------------------------------------------------------------------------------------------------------------------------------------------------------------|----------------|
| Stone et al., 2007 | Examine effects of a comprehensive set of working conditions on elderly patient safety outcomes in intensive care units | Quantitative, cross-sectional study | <p><b>Organisational climate:</b><br/>Perceptions of Nurse Work Environment Scale; administrative processes derived from monthly payroll data; monthly total ICU patient census data; Bureau of Labor Statistics regional estimates of RN salary</p> <p><b>Patient outcome(s):</b><br/>Central line associated bloodstream infection (CLBSI), ventilator associated pneumonia (VAP), and catheter-associated urinary tract infection (CAUTI) derived from Nosocomial Infections Surveillance's (NNIS) system of infection surveillance; 30-day mortality and decubiti were determined using Medicare files</p> | 15,846 patients; 1,095 nurses<br><br>Data collected 2002 | 51 adult intensive care units across 31 hospitals; USA | <p>Units with higher staffing had lower incidence of CLBSI, VAP, 30-day mortality, and decubiti</p> <p>Increased overtime was associated with higher rates of CAUTI and decubiti, but slightly lower rates of CLBSI</p> <p>The effects of organisational climate on patient safety outcomes were inconsistent. Patients admitted to ICUs in which the nurses' perceived a more positive organisational climate had slightly higher odds of developing a CLBSI, but were 39% less likely to develop a CAUTI</p> | High           |

1  
2  
3  
4  
5  
6  
7  
8  
9  
10  
11  
12  
13  
14  
15  
16  
17  
18  
19  
20  
21  
22  
23  
24  
25  
26  
27  
28  
29  
30  
31  
32  
33  
34  
35  
36  
37  
38  
39  
40  
41  
42  
43  
44  
45  
46  
47

| Study                       | Study objective(s)                                                                                                                              | Study design                        | Measures                                                                                                                                                                                                                                                                                                                                                 | Participants; Duration                                                                                             | Context; Setting                                | Key findings                                                                                                                                                                                                                                                | Quality rating |
|-----------------------------|-------------------------------------------------------------------------------------------------------------------------------------------------|-------------------------------------|----------------------------------------------------------------------------------------------------------------------------------------------------------------------------------------------------------------------------------------------------------------------------------------------------------------------------------------------------------|--------------------------------------------------------------------------------------------------------------------|-------------------------------------------------|-------------------------------------------------------------------------------------------------------------------------------------------------------------------------------------------------------------------------------------------------------------|----------------|
| Taylor et al., 2012         | Investigate the extent to which organisational characteristics (working conditions and safety climate) predict injuries for patients and nurses | Quantitative, cross-sectional study | <p><b>Safety climate:</b> Safety Attitudes Questionnaire (SAQ); unit turnover rates; registered nursing hours per day data obtained from Human Resources</p> <p><b>Patient outcome(s):</b> Patient injuries (falls, pressure ulcers, and pulmonary embolism/deep vein thrombosis) from administrative discharge data and Patient Safety Net software</p> | <p>723 nurses; 28,876 patient discharges</p> <p>Data collected: Safety climate: 2004<br/>Injury outcomes: 2005</p> | A trauma centre with Magnet nursing status; USA | <p>Safety culture was significantly associated with patient outcomes e.g., falls, decubitus ulcers and PE/DVT</p> <p>Working conditions were significantly associated with patient and nurse injury</p>                                                     | High           |
| Tei-Tominaga and Sato, 2016 | Examine the effect of nurses' work environment with characteristics that are similar to those of Magnet hospitals on patient                    | Quantitative, cross-sectional study | <p><b>Work environment:</b> Japanese version of the Practice Environment Scale of the Nursing Work Index (PES-NWI)</p> <p><b>Patient outcome(s):</b> Questionnaire assessing information about hospitalisation (number of hospitalisations, duration of hospitalisation, having</p>                                                                      | <p>425 nurses; 379 inpatients</p> <p>Data collected August 2011</p>                                                | Four hospitals; Japan                           | <p>Hospitals in Japan with a work environment that nurses perceive to be similar to the work environment in Magnet hospitals were associated with patient satisfaction</p> <p>Specifically, collegial nurse-physician relations was associated with low</p> | High           |

| Study                       | Study objective(s)                                                                                                                                                                      | Study design                        | Measures                                                                                                                                                                                                                                               | Participants; Duration                                                    | Context; Setting                      | Key findings                                                                                                                                                                                                                                                                                                                                                                                                        | Quality rating |
|-----------------------------|-----------------------------------------------------------------------------------------------------------------------------------------------------------------------------------------|-------------------------------------|--------------------------------------------------------------------------------------------------------------------------------------------------------------------------------------------------------------------------------------------------------|---------------------------------------------------------------------------|---------------------------------------|---------------------------------------------------------------------------------------------------------------------------------------------------------------------------------------------------------------------------------------------------------------------------------------------------------------------------------------------------------------------------------------------------------------------|----------------|
|                             | satisfaction in Japan                                                                                                                                                                   |                                     | operative treatment), and patient satisfaction                                                                                                                                                                                                         |                                                                           |                                       | patient satisfaction, however this association was weak, and diminished when hospital characteristics were considered in the analysis                                                                                                                                                                                                                                                                               |                |
| Temkin-Greener et al., 2010 | Examine the association between nursing home (NH) work environment attributes such as teams, consistent assignment and staff cohesion, and the risk of pressure ulcers and incontinence | Quantitative, cross-sectional study | <p><b>Work environment:</b><br/>Questionnaire purpose designed for the study assessing staff cohesion, presence of teams and consistent assignment</p> <p><b>Patient outcome(s):</b><br/>Pressure ulcer and incontinence from the Minimum Data Set</p> | 46,044 residents; 7,418 workers<br><br>Data collected June 2006-July 2007 | 162 long-term care nursing homes; USA | <p>Residents in facilities with worse staff cohesion had significantly greater odds of pressure ulcers and incontinence, compared with residents in facilities with better cohesion scores</p> <p>Residents in facilities with greater penetration of self-managed teams had lower risk of pressure ulcers, but not of incontinence</p> <p>Prevalence of consistent assignment was not significantly associated</p> | High           |

| Study                        | Study objective(s)                                                                                                                         | Study design                        | Measures                                                                                                                                                                                                                                              | Participants; Duration                                                       | Context; Setting                                                                                   | Key findings                                                                                                                                          | Quality rating |
|------------------------------|--------------------------------------------------------------------------------------------------------------------------------------------|-------------------------------------|-------------------------------------------------------------------------------------------------------------------------------------------------------------------------------------------------------------------------------------------------------|------------------------------------------------------------------------------|----------------------------------------------------------------------------------------------------|-------------------------------------------------------------------------------------------------------------------------------------------------------|----------------|
|                              |                                                                                                                                            |                                     |                                                                                                                                                                                                                                                       |                                                                              |                                                                                                    | with pressure ulcers or incontinence                                                                                                                  |                |
| Tervo-Heikkinen et al., 2008 | Assess the interrelationships between nurses' work environment and nursing outcomes                                                        | Quantitative, cross-sectional study | <b>Work environment:</b> Registered Nurse Working Conditions Barometry Index-revised (RN-WCBI-R); items from the Nurse Work Index-revised (NWI-R)<br><br><b>Patient outcome(s):</b> Total satisfaction indicator from the Humane Caring Scale-revised | 664 registered nurses (RN); 1,730 patients<br><br>Data collected during 2005 | 34 acute care inpatient hospital wards across four hospitals; Finland                              | Professional nursing standards staffing adequacy, and nursing respect and relationships were found to be important predictors of patient satisfaction | High           |
| Tzeng et al., 2002           | Investigate the relationship among staff nurses' assessment of organisational culture and general inpatient satisfaction with nursing care | Quantitative, cross-sectional study | <b>Organisational culture:</b> Nurse Assessment Survey (NAS)<br><br><b>Patient outcome(s):</b> Nursing Services Inpatient Satisfaction Survey (NSISS)                                                                                                 | 520 registered nurses; 345 patients<br><br>Duration not specified            | 13 medical/surgical adult units; two adult psychiatric units; two gynaecology/obstetric units; USA | Strength of culture had indirect positive effects (through nurse satisfaction) on patient satisfaction                                                | Medium         |
| Virtanen et al., 2009        | Examine the association                                                                                                                    | Quantitative, cross-                | <b>Organisational climate:</b> Questionnaire measuring                                                                                                                                                                                                | 1,092 patients; 1,159 staff                                                  | Six hospitals; Finland                                                                             | Long working hours among staff, high work                                                                                                             | High           |

| Study               | Study objective(s)                                                                                                                        | Study design                        | Measures                                                                                                                                                                                                                                                                                                                                                                               | Participants; Duration                                        | Context; Setting        | Key findings                                                                                                                                                                                                                                                                                                                            | Quality rating |
|---------------------|-------------------------------------------------------------------------------------------------------------------------------------------|-------------------------------------|----------------------------------------------------------------------------------------------------------------------------------------------------------------------------------------------------------------------------------------------------------------------------------------------------------------------------------------------------------------------------------------|---------------------------------------------------------------|-------------------------|-----------------------------------------------------------------------------------------------------------------------------------------------------------------------------------------------------------------------------------------------------------------------------------------------------------------------------------------|----------------|
|                     | between work hours, work stress, and collaboration among the ward personnel, and the risk of hospital-associated infection among patients | sectional study                     | <p>mean working hours, work stress (job strain and effort-reward imbalance), and collaboration (communication, justice in the distribution of work, support from supervisor, and quality of the collaboration between supervisors in the ward)</p> <p><b>Patient outcome(s):</b><br/>Hospital-associated infection derived from medical records and infection surveillance records</p> | Data collected March 2004-June 2004                           |                         | <p>stress, and problems in collaboration between personnel were related to infection among patients</p> <p>High effort-reward imbalance, low trust between ward members, injustice in the distribution of work, and poor collaboration between supervisors were all related to approximately a 2-fold infection risk among patients</p> |                |
| Warren et al., 2007 | Explore the association between health care employees' perceptions of their organisations and objective measures of                       | Quantitative, cross-sectional study | <p><b>Organisational climate:</b><br/>All Employee Survey (AES) comprising questions from the National Institute for Occupational Safety and Health (NIOSH) Instrument and the Organizational Assessment Survey (OAS); Bureau of Labor Statistics Survey of Employment;</p>                                                                                                            | <p>74,662 employees of the VHA</p> <p>Data collected 2001</p> | 141 VHA facilities; USA | <p>There was a relationship between some patient outcomes and organisational culture</p> <p>Patient satisfaction demonstrated the strongest connection with organisational climate. Inpatient and outpatient satisfaction</p>                                                                                                           | High           |

1  
2  
3  
4  
5  
6  
7  
8  
9  
10  
11  
12  
13  
14  
15  
16  
17  
18  
19  
20  
21  
22  
23  
24  
25  
26  
27  
28  
29  
30  
31  
32  
33  
34  
35  
36  
37  
38  
39  
40  
41  
42  
43  
44  
45  
46  
47

| Study                 | Study objective(s)                                                                                        | Study design                        | Measures                                                                                                                                                                                                                                                                                                                             | Participants; Duration                                                                             | Context; Setting                                             | Key findings                                                                                                                                                                      | Quality rating |
|-----------------------|-----------------------------------------------------------------------------------------------------------|-------------------------------------|--------------------------------------------------------------------------------------------------------------------------------------------------------------------------------------------------------------------------------------------------------------------------------------------------------------------------------------|----------------------------------------------------------------------------------------------------|--------------------------------------------------------------|-----------------------------------------------------------------------------------------------------------------------------------------------------------------------------------|----------------|
|                       | system performance (including employee and patient outcomes).                                             |                                     | Federal Aviation Administration Instrument<br><br><b>Patient outcome(s):</b> AES measuring attitudinal outcomes, and health and safety outcomes; Administrative Veterans Health Administration (VHA) Data Sets                                                                                                                       |                                                                                                    |                                                              | was strongly related to increased levels of support, and increased inpatient satisfaction is also associated with higher levels of Professional Demands                           |                |
| Weinberg et al., 2013 | Examine the benefits of a high-performance work environment (HPWE) for employees, patients, and hospitals | Quantitative, cross-sectional study | <b>Work environment:</b> Questionnaire based on Revised Nursing Work Index, Picker Hospital Employee Survey; variety of tools from other workplace settings, with particular focus on research on high-performance work systems and teams<br><br><b>Patient outcome(s):</b> Hospital Consumer Assessment of Healthcare Providers and | 16,459 discharge records; 2,920 patient surveys; 1,527 staff surveys<br><br>Duration not specified | 45 units across nine hospitals and seven health systems; USA | HPWE was significantly associated with patients' experience and safety. HPWE was related to lower odds that a patient will experience an adverse outcome during the hospital stay | High           |

| Study            | Study objective(s)                                                                                       | Study design                        | Measures                                                                                                                                                                                                                                                                          | Participants; Duration                                                                  | Context; Setting     | Key findings                                                                                                                                                                                                                                                                                                                                                         | Quality rating |
|------------------|----------------------------------------------------------------------------------------------------------|-------------------------------------|-----------------------------------------------------------------------------------------------------------------------------------------------------------------------------------------------------------------------------------------------------------------------------------|-----------------------------------------------------------------------------------------|----------------------|----------------------------------------------------------------------------------------------------------------------------------------------------------------------------------------------------------------------------------------------------------------------------------------------------------------------------------------------------------------------|----------------|
|                  |                                                                                                          |                                     | Systems (HCAHPS); discharge data                                                                                                                                                                                                                                                  |                                                                                         |                      |                                                                                                                                                                                                                                                                                                                                                                      |                |
| You et al., 2013 | Evaluate the link between nurse resources and nurse and patient outcomes                                 | Quantitative, cross-sectional study | <p><b>Work environment:</b><br/>Four of the five subscales of the Practice Environment Scale of the Nursing Work Index (PES-NWI)</p> <p><b>Patient outcome(s):</b><br/>Adapted version of the Consumer Assessment of Healthcare Providers and Systems (CAHPS) Hospital Survey</p> | <p>9,688 staff (nurses in particular); 5,786 patients</p> <p>Duration not specified</p> | 181 hospitals; China | <p>Patients in hospitals with better work environments were more likely to rate their hospital highly, to be satisfied with nursing communications, and to recommend their hospitals</p> <p>Higher patient-to-nurse ratios were unrelated to patient outcomes</p> <p>Higher percentages of baccalaureate nurses were strongly related to better patient outcomes</p> | High           |
| Zhou P, 2011     | Determine whether perceptions of organisational culture among employees of public hospitals in China are | Quantitative, cross-sectional study | <p><b>Organisational culture:</b><br/>Employee questionnaire measuring organisational culture</p> <p><b>Patient outcome(s):</b><br/>Hospital questionnaire assessing performance</p>                                                                                              | <p>3,437 staff; 8,276 patients</p> <p>Data collected June-October 2009</p>              | 87 hospitals; China  | <p>Culture emphasising social responsibility was negatively associated with length of stay</p> <p>Hospitals with culture emphasising cost control had higher rates of</p>                                                                                                                                                                                            | High           |

| Study | Study objective(s)                   | Study design | Measures                                                                                                                                           | Participants;<br>Duration | Context; Setting | Key findings                                                                                                                                                                                                          | Quality rating |
|-------|--------------------------------------|--------------|----------------------------------------------------------------------------------------------------------------------------------------------------|---------------------------|------------------|-----------------------------------------------------------------------------------------------------------------------------------------------------------------------------------------------------------------------|----------------|
|       | associated with hospital performance |              | outcomes such as LOS, outpatient visits per year, bed days per year, patient satisfaction; patient survey measuring satisfaction with medical care |                           |                  | outpatient visits and BDPPPD, as well as lower levels of patient satisfaction<br><br>Hospitals in which employees perceived the culture as customer-focused had longer length of stays but lower patient satisfaction |                |



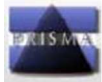

# PRISMA 2009 Checklist

1  
2  
3  
4  
5  
6  
7  
8  
9  
10  
11  
12  
13  
14  
15  
16  
17  
18  
19  
20  
21  
22  
23  
24  
25  
26  
27  
28  
29  
30  
31  
32  
33  
34  
35  
36  
37  
38  
39  
40  
41  
42  
43  
44  
45  
46  
47  
48  
49

| Section/topic                      | #  | Checklist item                                                                                                                                                                                                                                                                                              | Reported on page # |
|------------------------------------|----|-------------------------------------------------------------------------------------------------------------------------------------------------------------------------------------------------------------------------------------------------------------------------------------------------------------|--------------------|
| <b>TITLE</b>                       |    |                                                                                                                                                                                                                                                                                                             |                    |
| Title                              | 1  | Identify the report as a systematic review, meta-analysis, or both.                                                                                                                                                                                                                                         | 1, 4               |
| <b>ABSTRACT</b>                    |    |                                                                                                                                                                                                                                                                                                             |                    |
| Structured summary                 | 2  | Provide a structured summary including, as applicable: background; objectives; data sources; study eligibility criteria, participants, and interventions; study appraisal and synthesis methods; results; limitations; conclusions and implications of key findings; systematic review registration number. | 2-3                |
| <b>INTRODUCTION</b>                |    |                                                                                                                                                                                                                                                                                                             |                    |
| Rationale                          | 3  | Describe the rationale for the review in the context of what is already known.                                                                                                                                                                                                                              | 4-5                |
| Objectives                         | 4  | Provide an explicit statement of questions being addressed with reference to participants, interventions, comparisons, outcomes, and study design (PICOS).                                                                                                                                                  | 7-9                |
| <b>METHODS</b>                     |    |                                                                                                                                                                                                                                                                                                             |                    |
| Protocol and registration          | 5  | Indicate if a review protocol exists, if and where it can be accessed (e.g., Web address), and, if available, provide registration information including registration number.                                                                                                                               | 8                  |
| Eligibility criteria               | 6  | Specify study characteristics (e.g., PICOS, length of follow-up) and report characteristics (e.g., years considered, language, publication status) used as criteria for eligibility, giving rationale.                                                                                                      | 9                  |
| Information sources                | 7  | Describe all information sources (e.g., databases with dates of coverage, contact with study authors to identify additional studies) in the search and date last searched.                                                                                                                                  | 7-8                |
| Search                             | 8  | Present full electronic search strategy for at least one database, including any limits used, such that it could be repeated.                                                                                                                                                                               | 8                  |
| Study selection                    | 9  | State the process for selecting studies (i.e., screening, eligibility, included in systematic review, and, if applicable, included in the meta-analysis).                                                                                                                                                   | 6-7                |
| Data collection process            | 10 | Describe method of data extraction from reports (e.g., piloted forms, independently, in duplicate) and any processes for obtaining and confirming data from investigators.                                                                                                                                  | 6-7                |
| Data items                         | 11 | List and define all variables for which data were sought (e.g., PICOS, funding sources) and any assumptions and simplifications made.                                                                                                                                                                       | 6-7                |
| Risk of bias in individual studies | 12 | Describe methods used for assessing risk of bias of individual studies (including specification of whether this was done at the study or outcome level), and how this information is to be used in any data synthesis.                                                                                      | 12                 |
| Summary measures                   | 13 | State the principal summary measures (e.g., risk ratio, difference in means).                                                                                                                                                                                                                               | 8-9                |
| Synthesis of results               | 14 | Describe the methods of handling data and combining results of studies, if done, including measures of consistency (e.g., $I^2$ for each meta-analysis).                                                                                                                                                    | N/A                |

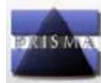

# PRISMA 2009 Checklist

Page 1 of 2

| Section/topic                 | #  | Checklist item                                                                                                                                                                                           | Reported on page # |
|-------------------------------|----|----------------------------------------------------------------------------------------------------------------------------------------------------------------------------------------------------------|--------------------|
| Risk of bias across studies   | 15 | Specify any assessment of risk of bias that may affect the cumulative evidence (e.g., publication bias, selective reporting within studies).                                                             | 12                 |
| Additional analyses           | 16 | Describe methods of additional analyses (e.g., sensitivity or subgroup analyses, meta-regression), if done, indicating which were pre-specified.                                                         | N/A                |
| <b>RESULTS</b>                |    |                                                                                                                                                                                                          |                    |
| Study selection               | 17 | Give numbers of studies screened, assessed for eligibility, and included in the review, with reasons for exclusions at each stage, ideally with a flow diagram.                                          | 10                 |
| Study characteristics         | 18 | For each study, present characteristics for which data were extracted (e.g., study size, PICOS, follow-up period) and provide the citations.                                                             | 10-12              |
| Risk of bias within studies   | 19 | Present data on risk of bias of each study and, if available, any outcome level assessment (see item 12).                                                                                                | 12                 |
| Results of individual studies | 20 | For all outcomes considered (benefits or harms), present, for each study: (a) simple summary data for each intervention group (b) effect estimates and confidence intervals, ideally with a forest plot. | 13-18              |
| Synthesis of results          | 21 | Present results of each meta-analysis done, including confidence intervals and measures of consistency.                                                                                                  | N/A                |
| Risk of bias across studies   | 22 | Present results of any assessment of risk of bias across studies (see Item 15).                                                                                                                          | 12                 |
| Additional analysis           | 23 | Give results of additional analyses, if done (e.g., sensitivity or subgroup analyses, meta-regression [see Item 16]).                                                                                    | N/A                |
| <b>DISCUSSION</b>             |    |                                                                                                                                                                                                          |                    |
| Summary of evidence           | 24 | Summarize the main findings including the strength of evidence for each main outcome; consider their relevance to key groups (e.g., healthcare providers, users, and policy makers).                     | 18-19              |
| Limitations                   | 25 | Discuss limitations at study and outcome level (e.g., risk of bias), and at review-level (e.g., incomplete retrieval of identified research, reporting bias).                                            | 19-20              |
| Conclusions                   | 26 | Provide a general interpretation of the results in the context of other evidence, and implications for future research.                                                                                  | 20                 |
| <b>FUNDING</b>                |    |                                                                                                                                                                                                          |                    |
| Funding                       | 27 | Describe sources of funding for the systematic review and other support (e.g., supply of data); role of funders for the systematic review.                                                               | 21                 |

From: Moher D, Liberati A, Tetzlaff J, Altman DG, The PRISMA Group (2009). Preferred Reporting Items for Systematic Reviews and Meta-Analyses: The PRISMA Statement. PLoS Med 6(7): e1000097. doi:10.1371/journal.pmed1000097

For more information, visit: [www.prisma-statement.org](http://www.prisma-statement.org).

Page 2 of 2

For peer review only - <http://bmjopen.bmj.com/site/about/guidelines.xhtml>
