# Supplementary material for: Association between organisational and workplace cultures, and patient outcomes: systematic review
Source: PubMed Central journal article supplement — BMJ Open. 2017 Nov 8;7(11):e017708. doi: 10.1136/bmjopen-2017-017708 (PMC5695304; doi:10.1136/bmjopen-2017-017708), 2017-11-08
Supplement: bmjopen-2017-017708supp002.pdf [file bmjopen-2017-017708supp002.pdf]

## Supplementary File B. Data Extraction Sheet

| Parameters                  | Detail                                                                                                                                                                                       | Reviewer entry                                                                                                                                                                                                                                                          |
|-----------------------------|----------------------------------------------------------------------------------------------------------------------------------------------------------------------------------------------|-------------------------------------------------------------------------------------------------------------------------------------------------------------------------------------------------------------------------------------------------------------------------|
| <b>Endnote ref #</b>        |                                                                                                                                                                                              |                                                                                                                                                                                                                                                                         |
| <b>Reference</b>            | <i>Authors, year, article title, journal name, vol, issue, page numbers (use Harvard Ref Style)</i>                                                                                          |                                                                                                                                                                                                                                                                         |
| <b>Location</b>             | <i>Country</i>                                                                                                                                                                               |                                                                                                                                                                                                                                                                         |
| <b>Language</b>             | <i>English only</i>                                                                                                                                                                          |                                                                                                                                                                                                                                                                         |
| <b>Time frame</b>           | <i>Period of data collection</i>                                                                                                                                                             |                                                                                                                                                                                                                                                                         |
| <b>Study type</b>           | <i>e.g., qualitative, mixed methods, intervention study</i>                                                                                                                                  |                                                                                                                                                                                                                                                                         |
| <b>Study primary aim</b>    | <i>e.g., test performance of organisations with different cultures; test an intervention</i>                                                                                                 |                                                                                                                                                                                                                                                                         |
| <b>Study secondary aims</b> | <i>e.g., identify factors associated with organisational culture</i>                                                                                                                         |                                                                                                                                                                                                                                                                         |
| <b>Exclude?</b>             | <i>Circle include or exclude, + reason if excluded</i>                                                                                                                                       | <ol style="list-style-type: none"> <li>1. Other languages</li> <li>2. Not peer reviewed literature</li> <li>3. Not healthcare setting</li> <li>4. Not primary empirical research</li> <li>5. Does not include organisational culture and/or patient outcomes</li> </ol> |
| <b>Data</b>                 | <i>Total N of organisation participants (e.g. three hospitals)</i>                                                                                                                           |                                                                                                                                                                                                                                                                         |
|                             | <i>Type of organisation participant (e.g. teaching hospital)</i>                                                                                                                             |                                                                                                                                                                                                                                                                         |
|                             | <i>Data types and sources used to performance and/or outcomes</i>                                                                                                                            |                                                                                                                                                                                                                                                                         |
|                             | <i>Methodological/statistical approach to identifying performance and/or outcomes</i>                                                                                                        |                                                                                                                                                                                                                                                                         |
| <b>Methods</b>              | <i>Methods used to study organisational or workplace culture or climate, and patient outcomes—summarise content of tools (e.g., interview questions/topics, surveys) used where possible</i> |                                                                                                                                                                                                                                                                         |

|                     |                                                                                                                                                        |  |
|---------------------|--------------------------------------------------------------------------------------------------------------------------------------------------------|--|
|                     | <i>Participants (e.g., nurses)</i>                                                                                                                     |  |
|                     | <i>Data analysis methods (e.g., statistical or quantitative method)</i>                                                                                |  |
| <b>Findings</b>     | <i>Quantitative results</i>                                                                                                                            |  |
|                     | <i>Qualitative results/ contextual factors most important for explaining relationship between culture and patient outcomes. Include example quotes</i> |  |
| <b>Implications</b> | <i>Recommendations for healthcare made based on the findings</i>                                                                                       |  |

*Note.* Table adapted from Taylor N, Clay-Williams R, Hogden E, Braithwaite J, Groene O. High performing hospitals: a qualitative systematic review of associated factors and practical strategies for improvement. *BMC Health Serv Res.* 2015;15(1):244.
