# Supplementary material for: Association between organisational and workplace cultures, and patient outcomes: systematic review
Source: PubMed Central journal article supplement — BMJ Open. 2017 Nov 8;7(11):e017708. doi: 10.1136/bmjopen-2017-017708 (PMC5695304; doi:10.1136/bmjopen-2017-017708), 2017-11-08
Supplement: bmjopen-2017-017708supp003.pdf [file bmjopen-2017-017708supp003.pdf]

## Supplementary File C. Risk of Bias Template

| Type of Bias            | Description                                                                                    | Example in Intervention Studies                                                                                                                                                                                  | Example of an Equivalent Scenario in Included Studies                                                                                |
|-------------------------|------------------------------------------------------------------------------------------------|------------------------------------------------------------------------------------------------------------------------------------------------------------------------------------------------------------------|--------------------------------------------------------------------------------------------------------------------------------------|
| <b>Selection bias</b>   | The bias that occurs when groups are not randomised and thus comparisons cannot be made        | Systematic differences in baseline characteristics between the groups, leading to biases when comparing results after an intervention; randomised groups being used                                              | That the context of the study was a convenience or purposive sample, or was not the most appropriate context for the study           |
| <b>Performance bias</b> | When study participants or researchers have knowledge of the study or its aims                 | Systematic differences in the care provided between the groups, or exposure to other confounding variables that influence results; can be minimised through double blinding (and reporting on its effectiveness) | Performance of the nurses or health professionals altering due to knowledge that patient outcomes are being measured                 |
| <b>Detection bias</b>   | Systematic differences in results due to the assessor's knowledge of study or group allocation | Differences in how outcomes are determined between groups; can be prevented through blinding of researchers                                                                                                      | Researchers interpreting the results have knowledge of the aims and hypotheses of the study, and the results are altered accordingly |
| <b>Attrition bias</b>   | The incompleteness of data due to participants withdrawing from the study                      | Systematic differences in withdrawals of groups from studies, leading to incomplete outcome data                                                                                                                 | The rate of non-participation e.g., in survey responses, the dropout rates between nurses and doctors                                |
| <b>Reporting bias</b>   | Selective reporting of outcomes                                                                | Difference in the probability of reporting significant verses insignificant findings                                                                                                                             | Significant findings more likely to be published than less important results                                                         |
| <b>Other bias</b>       | Any other important concerns regarding the study                                               | Biases that are found in a particular study setting                                                                                                                                                              | Bias due to issues not otherwise outlined here                                                                                       |

*Note.* Table descriptions derived from Higgins J, Altman D, Sterne J. Chapter 8. Assessing risk of bias in included studies. In: Higgins J, Green S, eds. *Cochrane Handbook for Systematic Reviews of Interventions Version 5.1.0*: The Cochrane Collaboration; 2011. Examples are the authors', based on included studies.
