# Supplementary material for: Association between organisational and workplace cultures, and patient outcomes: systematic review
Source: PubMed Central journal article supplement — BMJ Open. 2017 Nov 8;7(11):e017708. doi: 10.1136/bmjopen-2017-017708 (PMC5695304; doi:10.1136/bmjopen-2017-017708), 2017-11-08
Supplement: bmjopen-2017-017708supp004.pdf [file bmjopen-2017-017708supp004.pdf]

Supplementary File D. Summary of Included Articles

| Study              | Study objective(s)                                                                                                                     | Study design                        | Measures                                                                                                                                                                                                                                                                                                                                                      | Participants; Duration                                                                 | Context; Setting   | Key findings                                                                                                                                                                                                                                                                                                      | Quality rating |
|--------------------|----------------------------------------------------------------------------------------------------------------------------------------|-------------------------------------|---------------------------------------------------------------------------------------------------------------------------------------------------------------------------------------------------------------------------------------------------------------------------------------------------------------------------------------------------------------|----------------------------------------------------------------------------------------|--------------------|-------------------------------------------------------------------------------------------------------------------------------------------------------------------------------------------------------------------------------------------------------------------------------------------------------------------|----------------|
| Aiken et al., 2008 | Analyse the net effects of nurse practice environments on nurse and patient outcomes after accounting for nurse staffing and education | Quantitative, cross-sectional study | <p><b>Work environment:</b> Practice Environment Scale of the Nursing Work Index (PES-NWI); six survey measures assessing job satisfaction, burnout, and intent to leave job within the next year; three questions assessing nurses' perceptions of quality of care</p> <p><b>Patient outcome(s):</b> 30-day mortality rates from discharge abstract data</p> | <p>232,342 patients; 10,184 nurses</p> <p>Data collected April 1998- November 1999</p> | 168 hospitals; USA | <p>Care environment, along with nurses' education levels and nurse staffing, contributed to failure to rescue and mortality rates. Poorer environment had higher rates of mortality and failure-to-rescue</p> <p>Surgical mortality rates were more than 60% higher in hospitals with a poor work environment</p> | High           |
| Aiken et al., 2011 | Determine the conditions under which the impact of hospital nurse staffing, nurse education, and work environment are associated       | Quantitative, cross-sectional study | <p><b>Work environment:</b> Practice Environment Scale of the Nursing Work Index (PES-NWI)</p> <p><b>Patient outcome(s):</b> Patient deaths within 30 days of hospital admission and failure to rescue from the American Hospital</p>                                                                                                                         | <p>1,262,120 patients, 39,038 nurses</p> <p>Data collected 2005-2006</p>               | 665 hospitals; USA | Lowering the patient-to-nurse ratios significantly improved patient outcomes in hospitals with good work environments, somewhat improved patient outcomes in hospitals with average work environments, and had no effect on patient                                                                               | Medium         |

| Study                 | Study objective(s)                                                                                                                                                | Study design                        | Measures                                                                                                                                                                                                                                                                                                  | Participants; Duration                                            | Context; Setting                       | Key findings                                                                                                                                                                                                                                                                                                                                                                                   | Quality rating |
|-----------------------|-------------------------------------------------------------------------------------------------------------------------------------------------------------------|-------------------------------------|-----------------------------------------------------------------------------------------------------------------------------------------------------------------------------------------------------------------------------------------------------------------------------------------------------------|-------------------------------------------------------------------|----------------------------------------|------------------------------------------------------------------------------------------------------------------------------------------------------------------------------------------------------------------------------------------------------------------------------------------------------------------------------------------------------------------------------------------------|----------------|
|                       | with patient outcomes                                                                                                                                             |                                     | Association (AHA) Annual Survey                                                                                                                                                                                                                                                                           |                                                                   |                                        | outcomes in hospitals with poor work environments                                                                                                                                                                                                                                                                                                                                              |                |
| Aiken et al., 2013    | Determine the association between the use of agency-employed supplemental registered nurses (SRNs) to staff hospitals and patient mortality and failure to rescue | Quantitative, cross-sectional study | <p><b>Work environment:</b> Hospital use of SRNs; Practice Environment Scale of the Nursing Work Index (PES-NWI); nurse staffing metrics; nurse education metrics</p> <p><b>Patient outcome(s):</b> 30-day inpatient mortality and failure to rescue obtained from annual patient discharge summaries</p> | 40,356 registered nurses<br><br>Data collected 2005-2006          | 665 hospitals; USA                     | <p>Before controlling for nurse and hospital characteristics, higher proportions of SRNs nurses in hospitals were associated with higher mortality and failure to rescue</p> <p>This relationship became insignificant when work environments were taken into account</p> <p>Hospitals with higher proportions of supplemental registered nurses had significantly worse work environments</p> | Medium         |
| Ancarani et al., 2009 | Analyse the relation between different organisational                                                                                                             | Quantitative, cross-sectional study | <b>Organisation climate:</b> Interviews based on the Competing Value Framework                                                                                                                                                                                                                            | 1,018 patients; 625 medical staff (470 nurses and 155 physicians) | 47 wards across seven hospitals; Italy | An organisational model climate accentuating openness, change and innovation and a model emphasising cohesion                                                                                                                                                                                                                                                                                  | High           |

| Study                 | Study objective(s)                                                                                                                                                       | Study design                        | Measures                                                                                                                                                                                                                 | Participants; Duration                                                                   | Context; Setting                    | Key findings                                                                                                                                                                                                                                                                           | Quality rating |
|-----------------------|--------------------------------------------------------------------------------------------------------------------------------------------------------------------------|-------------------------------------|--------------------------------------------------------------------------------------------------------------------------------------------------------------------------------------------------------------------------|------------------------------------------------------------------------------------------|-------------------------------------|----------------------------------------------------------------------------------------------------------------------------------------------------------------------------------------------------------------------------------------------------------------------------------------|----------------|
|                       | climate models and patient satisfaction                                                                                                                                  |                                     | <b>Patient outcome(s):</b><br>Interviews based on SERVQUAL instrument, measuring consumer expectations and perceptions of a service                                                                                      | Data collected November 2007-May 2009                                                    |                                     | and workers' morale were positively related to patient satisfaction, whereas a model based on managerial control where negatively associated with patient satisfaction<br><br>Ward organisational climate significantly positively affected patient perceptions of the quality of care |                |
| Ancarani et al., 2011 | Test a model in which the ward manager's orientation towards a given organisational climate contributes to determine the climate perceived by medical and nursing staff. | Quantitative, cross-sectional study | <b>Organisational climate:</b><br>Organizational Climate Measure (OCM)<br><br><b>Patient outcome(s):</b><br>Questionnaire based on the SERVQUAL instrument, measuring consumer expectations and perceptions of a service | 57 managers; 621 nurses; 277 physicians; 1,598 patients.<br><br>Data collected 2007-2009 | 57 wards across 10 hospitals; Italy | Ward managers' Human Relations climate orientation is positively related to patient satisfaction                                                                                                                                                                                       | High           |

| Study                | Study objective(s)                                                                                                                                                | Study design                        | Measures                                                                                                                                                                                                                                                                                                                                                                                                                                                                                                                                                                     | Participants; Duration                                                                                                                                        | Context; Setting                           | Key findings                                                                                                                                                                            | Quality rating |
|----------------------|-------------------------------------------------------------------------------------------------------------------------------------------------------------------|-------------------------------------|------------------------------------------------------------------------------------------------------------------------------------------------------------------------------------------------------------------------------------------------------------------------------------------------------------------------------------------------------------------------------------------------------------------------------------------------------------------------------------------------------------------------------------------------------------------------------|---------------------------------------------------------------------------------------------------------------------------------------------------------------|--------------------------------------------|-----------------------------------------------------------------------------------------------------------------------------------------------------------------------------------------|----------------|
|                      | Test whether this, in turn, has an impact on patient satisfaction                                                                                                 |                                     |                                                                                                                                                                                                                                                                                                                                                                                                                                                                                                                                                                              |                                                                                                                                                               |                                            |                                                                                                                                                                                         |                |
| Ansmann et al., 2014 | Identify associations between hospital structures, physicians' social resources as well as job demands and control and patients perceived support from physicians | Quantitative, cross-sectional study | <p><b>Work environment:</b> Social capital measured by a six-item scale developed by Pfaff et al., 2004; Social support from colleagues measured using an adaptation of the original Caplan scales by Udris and Riemann; Job Content Questionnaire; Leadership survey measuring surgery volume and the number of hospitals constituting the breast cancer centre</p> <p><b>Patient outcome(s):</b> Three item questionnaire designed by authors assessing patients' perceptions of the support provided by physicians to help them cope with their illness and treatment</p> | <p>348 physicians; 108 leadership positions; 1,844 patients</p> <p>Physician survey November 2010-March 2011</p> <p>Leadership survey July-September 2010</p> | 35 breast cancer centre hospitals; Germany | Patients felt better supported by their physicians in hospitals with high social capital, a high percentage of permanently employed physicians, and less physically strained physicians | High           |

| Study                    | Study objective(s)                                                                                                                                                                                                                                    | Study design                        | Measures                                                                                                                                                                                                                                       | Participants; Duration                                                                                                                     | Context; Setting                                                       | Key findings                                                                                        | Quality rating |
|--------------------------|-------------------------------------------------------------------------------------------------------------------------------------------------------------------------------------------------------------------------------------------------------|-------------------------------------|------------------------------------------------------------------------------------------------------------------------------------------------------------------------------------------------------------------------------------------------|--------------------------------------------------------------------------------------------------------------------------------------------|------------------------------------------------------------------------|-----------------------------------------------------------------------------------------------------|----------------|
| Arnetz and Arnetz, 1996  | Develop a reliable and valid instrument, to determine the predictors of patients' ratings of quality and to measure patient satisfaction at two points in time to determine whether patient ratings change following a quality improvement initiative | Quantitative, interventional study  | <p><b>Work environment:</b><br/>Questionnaire assessing patients' perceptions of quality of care and staff work environment</p> <p><b>Patient outcome(s):</b><br/>Questionnaire assessing overall patient satisfaction with pain treatment</p> | <p>1,834 patients (1994); 2,499 patients (1995); unspecified numbers of hospital staff</p> <p>Data collected August 1994-November 1995</p> | One hospital, Sweden                                                   | Perceived work environment was a significant predictor for a positive overall patient quality grade | Medium         |
| Ausserhofer et al., 2013 | Explore the relationship between patient safety climate and patient                                                                                                                                                                                   | Quantitative, cross-sectional study | <p><b>Work environment:</b><br/>Safety Organizing Scale; Practice Environment Scale of the Nursing Work Index (PES-NWI); Basel Extent of Rationing of</p>                                                                                      | <p>1,633 RNs; 997 patients</p> <p>Data collected October 2009-June 2010</p>                                                                | 132 surgical, medical and mixed surgical-medical units across 35 acute | Patient safety climate was not found to be a significant predictor of patient satisfaction          | High           |

| Study                     | Study objective(s)                                                                                                                             | Study design                     | Measures                                                                                                                                                                                                                                                                   | Participants; Duration                                                                                                                                                                                                        | Context; Setting                                            | Key findings                                                                                                                                                                                                                                                                                                   | Quality rating |
|---------------------------|------------------------------------------------------------------------------------------------------------------------------------------------|----------------------------------|----------------------------------------------------------------------------------------------------------------------------------------------------------------------------------------------------------------------------------------------------------------------------|-------------------------------------------------------------------------------------------------------------------------------------------------------------------------------------------------------------------------------|-------------------------------------------------------------|----------------------------------------------------------------------------------------------------------------------------------------------------------------------------------------------------------------------------------------------------------------------------------------------------------------|----------------|
|                           | outcomes in Swiss acute care hospitals, adjusting for major organisational variables                                                           |                                  | <p>Nursing Care (BERNCA-R); nurse staffing level and skill mix items from the RN4CAST study nurse questionnaire</p> <p><b>Patient outcome(s):</b><br/>Patient satisfaction item from the Hospital Consumer Assessment of Healthcare Providers and Systems</p>              |                                                                                                                                                                                                                               | care hospitals; Switzerland                                 |                                                                                                                                                                                                                                                                                                                |                |
| Barsade and O'Neill, 2014 | Examine the influence of a culture of compassionate love, on outcomes for employees, residents in a long-term care setting, and their families | Quantitative, longitudinal study | <p><b>Organisational culture:</b><br/>Culture of Companionate Love Scale</p> <p><b>Patient outcome(s):</b><br/>Questionnaires measuring mood, satisfaction and quality of life; medical database records of weight gain, emergency room transfers, and pressure ulcers</p> | <p>185 employees (certified nursing assistants, nurses, social workers, physicians, food service workers, and employees and other employees); 108 residents; 42 family members of residents</p> <p>Duration not specified</p> | 13 units across three long-term care residential sites; USA | <p>There was a significant positive association between companionate love culture, patient mood, quality of life, satisfaction, and fewer trips to the emergency room</p> <p>There was no significant association between compassionate love culture and weight gain or lower incidence of pressure ulcers</p> | Medium         |

| Study                | Study objective(s)                                                                                                                                                                                                                                                                       | Study design                        | Measures                                                                                                                                                                                                                                                                                                                     | Participants; Duration                                                                                                                                                                                                                | Context; Setting                                                                                    | Key findings                                                                                                                                                                                                                                                                                                                                                                                     | Quality rating |
|----------------------|------------------------------------------------------------------------------------------------------------------------------------------------------------------------------------------------------------------------------------------------------------------------------------------|-------------------------------------|------------------------------------------------------------------------------------------------------------------------------------------------------------------------------------------------------------------------------------------------------------------------------------------------------------------------------|---------------------------------------------------------------------------------------------------------------------------------------------------------------------------------------------------------------------------------------|-----------------------------------------------------------------------------------------------------|--------------------------------------------------------------------------------------------------------------------------------------------------------------------------------------------------------------------------------------------------------------------------------------------------------------------------------------------------------------------------------------------------|----------------|
| Benning et al., 2011 | Evaluation of the first phase of the Health Foundation's Safer Patients Initiative (SPI): organisational intervention that focused on improving the reliability of specific frontline care processes in designated clinical specialties and promoting organisational and cultural change | Mixed methods, interventional study | <p><b>Organisational culture:</b> Semi-structured interviews investigating understanding of and enthusiasm for the SPI1; NHS Staff Survey</p> <p><b>Patient outcome(s):</b> Errors and adverse events from case notes; mortality rates; patient satisfaction based on the National NHS Acute Inpatient Survey in England</p> | <p>Interviews: 60 senior/strategic staff; 47 ward staff</p> <p>Survey: 3,397 staff in hospitals enrolled in the intervention; 15,300 staff in control hospitals</p> <p>Case notes: 1,237 patients</p> <p>Data collected 2005-2006</p> | Four hospitals participating in the first phase of the SPI and 18 control hospitals; United Kingdom | <p>There was a small improvement in staff attitudes to organisational climate in intervention hospitals</p> <p>On a range of other measures and outcomes related to patient safety, there was no additive effect attributable to the SPI</p> <p>Survey of patients showed no significant differences apart from an increase in perception of cleanliness in favour of intervention hospitals</p> | High           |
| Borg et al., 2015    | Establish the applicability of the Hofstede survey tool to measure and quantify organisational                                                                                                                                                                                           | Quantitative, cross-sectional study | <p><b>Organisational culture:</b> Hofstede Survey Tool</p> <p><b>Patient outcome(s):</b> Methicillin resistant Staphylococcus aureus (MRSA) prevalence</p>                                                                                                                                                                   | <p>135 doctors and nurses</p> <p>Data collected July-August 2012</p>                                                                                                                                                                  | Intensive care departments of seven tertiary care hospitals; four European countries                | Hospitals with a history of consistently low prevalence of MRSA exhibited high scores for change facilitation and change readiness,                                                                                                                                                                                                                                                              | Low            |

| Study              | Study objective(s)                                                                                                                                                                       | Study design                        | Measures                                                                                                                                                                                                                                                             | Participants; Duration                                                                                                 | Context; Setting                           | Key findings                                                                                                                                                                          | Quality rating |
|--------------------|------------------------------------------------------------------------------------------------------------------------------------------------------------------------------------------|-------------------------------------|----------------------------------------------------------------------------------------------------------------------------------------------------------------------------------------------------------------------------------------------------------------------|------------------------------------------------------------------------------------------------------------------------|--------------------------------------------|---------------------------------------------------------------------------------------------------------------------------------------------------------------------------------------|----------------|
|                    | culture in healthcare settings, and attempt to evaluate any associations between Infection Prevention and Control (IPC) outcomes and organisational culture scores                       |                                     | identified from blood cultures                                                                                                                                                                                                                                       |                                                                                                                        |                                            | together with perceptions of trust.<br><br>Hospitals with high prevalence of MRSA exhibited low scores for change readiness and change facilitation, but high scores for job security |                |
| Bosch et al., 2008 | Test the introduction of the diabetes passport and assess to what extent important aspects of restructured care such as multidisciplinary teamwork and different types of organisational | Quantitative, cross-sectional study | <p><b>Team climate:</b> Team Climate Inventory</p> <p><b>Organisational culture:</b> Competing Values Framework</p> <p><b>Patient outcome(s):</b> Measures of quality of diabetes care and clinical patient characteristics from medical records and self-report</p> | 752 patients with Diabetes mellitus type II; 83 Dutch health care professionals<br><br>Data collected during 2003-2004 | 30 primary care practices; The Netherlands | None of the selected clinical patient outcomes demonstrated significant associations with team climate or culture.                                                                    | High           |



| Study                | Study objective(s)                                                                             | Study design                        | Measures                                                                                                                                                                             | Participants; Duration                                                                                                        | Context; Setting               | Key findings                                                                                                                                                                                                                                                                                                                                      | Quality rating |
|----------------------|------------------------------------------------------------------------------------------------|-------------------------------------|--------------------------------------------------------------------------------------------------------------------------------------------------------------------------------------|-------------------------------------------------------------------------------------------------------------------------------|--------------------------------|---------------------------------------------------------------------------------------------------------------------------------------------------------------------------------------------------------------------------------------------------------------------------------------------------------------------------------------------------|----------------|
|                      | culture are associated with high quality diabetes care in small office-based general practices |                                     |                                                                                                                                                                                      |                                                                                                                               |                                |                                                                                                                                                                                                                                                                                                                                                   |                |
| Bradley et al., 2012 | Identify hospital strategies associated with lower RSMR (risk standardised mortality rates)    | Quantitative, cross-sectional study | <p><b>Organisational environment:</b> Questionnaire assessing the use of hospital strategies</p> <p><b>Patient outcome(s):</b> 30-day hospital RSMR based on hospital discharges</p> | <p>Unspecified number of patients hospitalised with acute myocardial infarction</p> <p>Data collected July 2005-June 2008</p> | 533 acute care hospitals; USA  | Key aspects of organisational environment (measured through hospital strategies) including effective communication and collaboration among groups, broad staff (cardiologist and pharmacist) presence and expertise, and a culture of creative problem solving and learning amongst cardiologists, were statistically associated with lower RSMRs | Medium         |
| Brewer, 2006         | Test the transtheoretical integration model (TIM)                                              | Quantitative, cross-sectional study | <b>Organisational culture:</b> Questionnaire measuring two hospital culture variables (group culture                                                                                 | 411 hospital employees (nurse and multi-                                                                                      | Four acute care hospitals; USA | A group-type culture (affiliation among all levels of hospital staff)                                                                                                                                                                                                                                                                             | High           |

| Study                | Study objective(s)                                                                                                                                                                                                                                                | Study design                        | Measures                                                                                                                                                                                                                                                                                                                                  | Participants; Duration                                          | Context; Setting              | Key findings                                                                                                                                                                                               | Quality rating |
|----------------------|-------------------------------------------------------------------------------------------------------------------------------------------------------------------------------------------------------------------------------------------------------------------|-------------------------------------|-------------------------------------------------------------------------------------------------------------------------------------------------------------------------------------------------------------------------------------------------------------------------------------------------------------------------------------------|-----------------------------------------------------------------|-------------------------------|------------------------------------------------------------------------------------------------------------------------------------------------------------------------------------------------------------|----------------|
|                      | <p>which proposes relationships among team-based phenomena and patient safety and resource-use outcome variables. TIM consists of Work Group Design, Hospital Culture, Positive Inrateam Process, Negative Inrateam Process, and Organisational Effectiveness</p> |                                     | <p>and developmental culture) through staff members' perceptions of hospital culture, work group design, and positive and negative team processes</p> <p><b>Patient outcome(s):</b><br/>Administrative quality reports recording patient falls with injury; financial reports measuring patient care unit expenses and length of stay</p> | <p>disciplinary team members)</p> <p>Duration not specified</p> |                               | <p>was inversely related to patient falls with injury</p> <p>Developmental culture (innovation and risk taking) was positively related to patient falls with injury and total expenses per patient day</p> |                |
| Carthon et al., 2015 | Examine the relationship between missing nursing care and                                                                                                                                                                                                         | Quantitative, cross-sectional study | <b>Work environment:</b><br>Practice Environment Scale of the Nursing Work Index (PES-NWI)                                                                                                                                                                                                                                                | 20,605 bedside nurses; 160,930 patients with heart failure      | 419 acute care hospitals; USA | Before adjusting for patient and hospital characteristics, patients were more likely to experience a                                                                                                       | Medium         |

| Study                   | Study objective(s)                                                                                           | Study design                        | Measures                                                                                                                                                                                                                                 | Participants; Duration                                                   | Context; Setting                            | Key findings                                                                                                                                                                                                                                                                      | Quality rating |
|-------------------------|--------------------------------------------------------------------------------------------------------------|-------------------------------------|------------------------------------------------------------------------------------------------------------------------------------------------------------------------------------------------------------------------------------------|--------------------------------------------------------------------------|---------------------------------------------|-----------------------------------------------------------------------------------------------------------------------------------------------------------------------------------------------------------------------------------------------------------------------------------|----------------|
|                         | hospital readmissions                                                                                        |                                     | <b>Patient outcome(s):</b> All-cause readmission within 30 days of discharge from an index admission for heart failure                                                                                                                   | Data collected 2005-2006                                                 |                                             | readmission when nursing care activities were more frequently missed (exception: pain management and timely medication administration)<br><br>Once adjusting for work environment, the effects of missing essential nursing was no longer a significant predictor of readmissions |                |
| Cassie and Cassie, 2012 | Examine the effect of organisational culture and climate on depressive symptoms among nursing home residents | Quantitative, cross-sectional study | <b>Organisational culture:</b> Organizational Social Context Scale<br><br><b>Patient outcome(s):</b> Minimum Data Set (Depression Rating Scale (DRS); Cognitive Performance Scale (CPS); Activities of Daily Living - Long Form (ADL-L)) | 1,114 employees; 5,497 residents<br><br>Data collected Jan 2007-May 2008 | 23 nursing homes; USA                       | Depressive symptoms were associated with two dimensions of organisational culture (proficiency and resistance), and three dimensions of climate (stress, engagement, and functionality)                                                                                           | High           |
| Chang and Mark, 2011    | Investigate whether learning                                                                                 | Quantitative, cross-                | <b>Work environment:</b> Questionnaires assessing work dynamics and                                                                                                                                                                      | 2,744 patients; 4,954 nurses                                             | 279 nursing units across 146 hospitals; USA | Significant negative relationship between learning climate and                                                                                                                                                                                                                    | Medium         |

| Study            | Study objective(s)                                                                          | Study design                        | Measures                                                                                                                                                                       | Participants; Duration                | Context; Setting                   | Key findings                                                                                                                                                                                                                                                                                                                                                                                                                               | Quality rating |
|------------------|---------------------------------------------------------------------------------------------|-------------------------------------|--------------------------------------------------------------------------------------------------------------------------------------------------------------------------------|---------------------------------------|------------------------------------|--------------------------------------------------------------------------------------------------------------------------------------------------------------------------------------------------------------------------------------------------------------------------------------------------------------------------------------------------------------------------------------------------------------------------------------------|----------------|
|                  | climate moderates the relationship between error producing conditions and medication errors | sectional study                     | <p>communication with physicians</p> <p><b>Learning climate:</b> Error Orientation Scale</p> <p><b>Patient outcome(s):</b> Medication error obtained from incident reports</p> | Data collected 2003-2004              |                                    | <p>medication errors (the more positive the learning environment was, the fewer medication errors occurred). However, there was no significant difference when the learning culture was average compared to when it was good</p> <p>Communication and experience were not associated with medication errors significantly</p> <p>Work dynamics was not significantly associated with medication errors, regardless of learning climate</p> |                |
| Cho et al., 2015 | Examine the effects of nurse staffing, work environment,                                    | Quantitative, cross-sectional study | <b>Work environment:</b> Practice Environment Scale of the Nursing Work Index (PES-NWI)                                                                                        | 1,024 staff; 76,036 surgical patients | 14 teaching hospitals; South Korea | Patient mortality was nearly 48% lower in hospitals with better nurse work                                                                                                                                                                                                                                                                                                                                                                 |                |

| Study                  | Study objective(s)                                                                                                                              | Study design                           | Measures                                                                                                                                                                                                                                       | Participants; Duration                                                                                                                                                                                                                                                                | Context; Setting            | Key findings                                                                                               | Quality rating |
|------------------------|-------------------------------------------------------------------------------------------------------------------------------------------------|----------------------------------------|------------------------------------------------------------------------------------------------------------------------------------------------------------------------------------------------------------------------------------------------|---------------------------------------------------------------------------------------------------------------------------------------------------------------------------------------------------------------------------------------------------------------------------------------|-----------------------------|------------------------------------------------------------------------------------------------------------|----------------|
|                        | and education on patient mortality                                                                                                              |                                        | <b>Patient outcome(s):</b><br>Patient discharge data recording patient characteristics and 30-day mortality rates                                                                                                                              | Data was collected January-December 2008                                                                                                                                                                                                                                              |                             | environments compared to hospitals with mixed or poor nurse work environments                              |                |
| Coustasse et al., 2008 | Analyse organisational culture in a community hospital in Texas to measure organisational culture change and its impact on patient satisfaction | Mixed methods, longitudinal case study | <b>Organisational culture:</b><br>Two sets of open-ended semi-structured interviews assessing organisational culture<br><br><b>Patient outcome(s):</b><br>Patient satisfaction scores and percentiles from Inpatient and Outpatient care areas | Semi-structured interviews: 162 Hospital staff<br><br>Culture interview: 29 members of the executive team<br><br>Surveys: 600 staff employees<br><br>Field experiment data collected January 2003-December 2003<br><br>Patient satisfaction data collected January 1998-December 2003 | One community hospital; USA | The shared vision of one subculture within the hospital was associated with increased patient satisfaction | Medium         |

| Study                   | Study objective(s)                                                                                                    | Study design                         | Measures                                                                                                                                                                                                                                               | Participants; Duration                                                                                                                                                                | Context; Setting                                            | Key findings                                                                                                                                                                                                                                                                                                                                                   | Quality rating |
|-------------------------|-----------------------------------------------------------------------------------------------------------------------|--------------------------------------|--------------------------------------------------------------------------------------------------------------------------------------------------------------------------------------------------------------------------------------------------------|---------------------------------------------------------------------------------------------------------------------------------------------------------------------------------------|-------------------------------------------------------------|----------------------------------------------------------------------------------------------------------------------------------------------------------------------------------------------------------------------------------------------------------------------------------------------------------------------------------------------------------------|----------------|
| Davenport et al., 2007  | Measure the impact of organisational climate safety factors (OCSFs) on risk-adjusted surgical morbidity and mortality | Quantitative, cross-sectional survey | <p><b>Organisational climate:</b> Safety Attitudes Questionnaire (SAQ)</p> <p><b>Patient outcome(s):</b> Risk-adjusted morbidity and mortality outcomes derived using the National Surgical Quality Improvement Program (NSQIP) dataset and models</p> | <p>6,083 attending and resident doctors, nurses, and other providers</p> <p>Models derived from data on more than 100,000 patients</p> <p>Data collected July 2003-September 2004</p> | 44 Veterans Affairs and eight academic medical centres; USA | <p>The OCSF measures of teamwork climate, safety climate, working conditions, recognition of stress effects, job satisfaction, and burnout were not correlated with risk-adjusted morbidity and mortality</p> <p>Reported levels of positive communication/collaboration with attending and resident doctors correlated with lower risk-adjusted morbidity</p> | High           |
| Dubois C-A et al., 2013 | Examine the associations of four distinct nursing care organisational models with patient safety outcomes             | Quantitative, cross sectional study  | <p><b>Organisational culture:</b> Four category variable representing nursing care organisational models</p> <p><b>Patient outcome(s):</b> Patient records reporting medication errors, falls, pneumonia, urinary tract infections, unjustified</p>    | <p>2,699 patients</p> <p>Data collected in a 30-day period, undocumented timeframe</p>                                                                                                | 11 hospitals; Canada                                        | After controlling for patient characteristics, patient risk of experiencing one or more events and of experience an event with consequences was significantly lower in the innovative professional and basic models compared to the                                                                                                                            | High           |

| Study                 | Study objective(s)                                                                                                                                  | Study design                                                    | Measures                                                                                                                                                                                                                                                                | Participants; Duration                                                                                                                                  | Context; Setting                                                                                                                                                 | Key findings                                                                                                                                                                                                                                                                                                           | Quality rating |
|-----------------------|-----------------------------------------------------------------------------------------------------------------------------------------------------|-----------------------------------------------------------------|-------------------------------------------------------------------------------------------------------------------------------------------------------------------------------------------------------------------------------------------------------------------------|---------------------------------------------------------------------------------------------------------------------------------------------------------|------------------------------------------------------------------------------------------------------------------------------------------------------------------|------------------------------------------------------------------------------------------------------------------------------------------------------------------------------------------------------------------------------------------------------------------------------------------------------------------------|----------------|
|                       |                                                                                                                                                     |                                                                 | restraints and pressure ulcers                                                                                                                                                                                                                                          |                                                                                                                                                         |                                                                                                                                                                  | <p>adaptive functional and basic functional models</p> <p>The lowest rates of negative outcomes were seen in the innovative professional model, characterised by richer staff skill mix, higher staffing intensity, and an environment with greater support of professional practice and investments in innovation</p> |                |
| Duffield et al., 2011 | What are the relationships among patient outcomes (OPSN (Outcomes Potentially Sensitive to Nursing) [consisting of 11 patient outcomes], falls, and | Quantitative, longitudinal and concurrent cross-sectional study | <p><b>Work environment:</b> The Area Health Services database; NWI-R; Nurse questionnaire measuring perceptions about the work environment and quality of care on the unit; Environmental Complexity Scale</p> <p><b>Patient outcome(s):</b> The Health Information</p> | Longitudinal study: 10,132,246 (4,964,924 matched to wards) ward stay records, 10,963,806 (2,675,428 matched to wards) nurse roster and payroll records | <p>Longitudinal study: Patient data from 80 hospitals; nursing staff data from 27 hospitals; Australia</p> <p>Cross-sectional study: 19 hospitals; Australia</p> | <p>Increased medication errors were associated with more nurses experiencing a threat of violence and tasks delayed</p> <p>Time-based medication errors were associated with perceptions of physical violence, emotional abuse, the amount of additional</p>                                                           | Medium         |

| Study                   | Study objective(s)                                                                                                                                                          | Study design                        | Measures                                                                                                                                                                                                                                                                                                            | Participants; Duration                                                                                                                                              | Context; Setting                | Key findings                                                                                                                                                                             | Quality rating |
|-------------------------|-----------------------------------------------------------------------------------------------------------------------------------------------------------------------------|-------------------------------------|---------------------------------------------------------------------------------------------------------------------------------------------------------------------------------------------------------------------------------------------------------------------------------------------------------------------|---------------------------------------------------------------------------------------------------------------------------------------------------------------------|---------------------------------|------------------------------------------------------------------------------------------------------------------------------------------------------------------------------------------|----------------|
|                         | medication errors), nurse skill mix, nursing workload, and the nursing work environment                                                                                     |                                     | Exchange (HIE) database; patient discharge data                                                                                                                                                                                                                                                                     | Data collected from 2000-2006<br><br>Cross-sectional study:<br>5,885 patient records, 22,497 patient-days, 13,442 nurse shifts<br><br>Data collected from 2004-2005 |                                 | time needed for patient care per shift, higher turnover of patients, and the proportion of patients waiting for a care facility                                                          |                |
| Estabrooks et al., 2011 | Assess the relative effects and importance of nursing education and skill mix, continuity of care, and quality of the work environment on 30-day mortality rate of patients | Quantitative, cross-sectional study | <b>Work environment:</b><br>Questionnaire assessing nursing skill mix, use of casual and temporary nurses, quality of care, job satisfaction, and educational preparation<br><br><b>Patient outcome(s):</b><br>Discharge abstracts reporting patient information (age, sex, vital status at discharge, and comorbid | 18,142 patients; 6,526 nurses<br><br>Data collected April 1998-March 1999                                                                                           | 49 acute care hospitals; Canada | Factors associated with a lower patient mortality rate included high nurse education levels, richer skill mix, better nurse-physician relationship, less casual and temporary employment | High           |



| Study                   | Study objective(s)                                                                                                                                                                | Study design                     | Measures                                                                                                                                                                        | Participants; Duration                                                                                                                                                                                     | Context; Setting                                                       | Key findings                                                                                                                                                                                                                                                                                                                                                                                                                                                                            | Quality rating |
|-------------------------|-----------------------------------------------------------------------------------------------------------------------------------------------------------------------------------|----------------------------------|---------------------------------------------------------------------------------------------------------------------------------------------------------------------------------|------------------------------------------------------------------------------------------------------------------------------------------------------------------------------------------------------------|------------------------------------------------------------------------|-----------------------------------------------------------------------------------------------------------------------------------------------------------------------------------------------------------------------------------------------------------------------------------------------------------------------------------------------------------------------------------------------------------------------------------------------------------------------------------------|----------------|
|                         | (after adjusting for institutional factors and patient characteristics)                                                                                                           |                                  | conditions, and primary diagnosis)                                                                                                                                              |                                                                                                                                                                                                            |                                                                        |                                                                                                                                                                                                                                                                                                                                                                                                                                                                                         |                |
| Estabrooks et al., 2015 | Examine the influence of organisational context on symptom burden and to compare symptom burden in the last year of life between nursing home residents with and without dementia | Quantitative, longitudinal study | <p><b>Organisational environment:</b> In-person interviews using the Alberta Content Tool</p> <p><b>Patient outcome(s):</b> Resident Assessment Instrument-Minimum Data Set</p> | <p>3,647 residents (2,635 with dementia and 1,012 without); 1381 front-line care</p> <p>Organisational environment data collected July 2009-June 2010</p> <p>Patient outcomes data collected 2008-2012</p> | 36 nursing homes (including both high and low care facilities); Canada | <p>Symptom burden at end of life differs between low- and high-context facilities</p> <p>Residents of high-context facilities had longer average length of stay, more unstable health and aggressive and challenging behaviour, and higher prevalence of dementia and delirium, compared to low-context facilities</p> <p>The prevalence of dyspnea, pain, urinary tract infections, cancer diagnosis and use of antipsychotics without a diagnosis of psychosis was lower in high-</p> | High           |

| Study                   | Study objective(s)                                                                | Study design                        | Measures                                                                                                                                                                      | Participants; Duration                                                                                                                                      | Context; Setting                                                              | Key findings                                                                                                                                                                                                                                                                                                                                                                                                             | Quality rating |
|-------------------------|-----------------------------------------------------------------------------------|-------------------------------------|-------------------------------------------------------------------------------------------------------------------------------------------------------------------------------|-------------------------------------------------------------------------------------------------------------------------------------------------------------|-------------------------------------------------------------------------------|--------------------------------------------------------------------------------------------------------------------------------------------------------------------------------------------------------------------------------------------------------------------------------------------------------------------------------------------------------------------------------------------------------------------------|----------------|
|                         |                                                                                   |                                     |                                                                                                                                                                               |                                                                                                                                                             |                                                                               | context facilities                                                                                                                                                                                                                                                                                                                                                                                                       |                |
| Fan et al., 2016        | Evaluate the association between safety culture and surgical site infection (SSI) | Quantitative, cross-sectional study | <p><b>Safety culture:</b> Hospital Survey on Patient Safety Culture (HSOPS)</p> <p><b>Patient outcome(s):</b> Postoperative colon surgery SSI data reported by hospitals</p>  | <p>1,926 personnel from surgical units</p> <p>Safety culture data collected November 2012-December 2013</p> <p>SSI data collected January-December 2013</p> | Seven hospitals; USA                                                          | Ten of the 12 safety culture dimensions were associated with colon SSI rate (perceptions of patient safety, teamwork across units, organisational learning, feedback and communication about error, management support for patient safety, teamwork within units, communication openness, supervisor/manager expectations and actions promoting safety, non-punitive response to error and frequency of events reported) | Medium         |
| Fedorowsky et al., 2015 | Assess the association between organisational culture and health care workers'    | Quantitative, cross-sectional study | <p><b>Organisational culture:</b> Questionnaire assessing staff engagement, overwhelmed/stress-chaos, hospital leadership, health care workers' knowledge, attitudes, and</p> | 268 health care workers (registered/academic nurses, practical nurses/auxiliary staff, physicians,                                                          | One Post-acute care facility (PACF) and one acute care hospital (ACH); Israel | The organisational culture factor known as staff engagement was negatively correlated with CRE acquisition rate                                                                                                                                                                                                                                                                                                          | Medium         |

| Study                | Study objective(s)                                                                                                           | Study design                        | Measures                                                                                                                                                                                                    | Participants;<br>Duration                                                                                                                                                                                                          | Context; Setting            | Key findings                                                                                                                                                                                                   | Quality rating |
|----------------------|------------------------------------------------------------------------------------------------------------------------------|-------------------------------------|-------------------------------------------------------------------------------------------------------------------------------------------------------------------------------------------------------------|------------------------------------------------------------------------------------------------------------------------------------------------------------------------------------------------------------------------------------|-----------------------------|----------------------------------------------------------------------------------------------------------------------------------------------------------------------------------------------------------------|----------------|
|                      | attitudes, knowledge, practices, and CRE (Carbapenem-Resistant Enterobacteriaceae) acquisition rates                         |                                     | practices regarding CRE prevention<br><br><b>Patient outcome(s):</b> CRE acquisition rates from the Israeli National Infection Prevention Center                                                            | and paramedical staff, e.g., radiology technicians and physiotherapists)<br><br>Organisational culture questionnaire distributed in January-February 2013<br><br>CRE acquisition rates obtained from January-December 2013 records |                             | Overwhelmed/stress-chaos was positively correlated with CRE acquisitions<br><br>Hospital leadership showed no significant correlation with CRE acquisition in either contexts                                  |                |
| Gardner et al., 2007 | Examine the relationships between staff nurses' perceptions of dialysis work environments, nurses' intentions to leave their | Quantitative, cross-sectional study | <b>Work environment:</b> Practice Environment Scale of the Nursing Work Index (PES-NWI)<br><br><b>Patient outcome(s):</b> Dialysis facility patient satisfaction survey; Number of patient hospitalisations | 199 nurses<br><br>Duration not specified                                                                                                                                                                                           | 56 dialysis facilities; USA | Negative overall ratings of the dialysis work environment were significantly related to hospitalisations for patients on dialysis greater than 90 days<br><br>PES-NWI scores were not significantly related to | High           |

| Study                          | Study objective(s)                                                                                                                          | Study design                       | Measures                                                                                                                                                                                                                                                                                                      | Participants; Duration                                                                        | Context; Setting         | Key findings                                                                                                                                                                                                                                                                                                                                                                                                                         | Quality rating |
|--------------------------------|---------------------------------------------------------------------------------------------------------------------------------------------|------------------------------------|---------------------------------------------------------------------------------------------------------------------------------------------------------------------------------------------------------------------------------------------------------------------------------------------------------------|-----------------------------------------------------------------------------------------------|--------------------------|--------------------------------------------------------------------------------------------------------------------------------------------------------------------------------------------------------------------------------------------------------------------------------------------------------------------------------------------------------------------------------------------------------------------------------------|----------------|
|                                | current jobs, nurse turnover, patient satisfaction, and patient hospitalisation rates                                                       |                                    |                                                                                                                                                                                                                                                                                                               |                                                                                               |                          | patient satisfaction scores                                                                                                                                                                                                                                                                                                                                                                                                          |                |
| Greenslade and Jimmieson, 2011 | Test the model that service climate would increase the effort and performance of nursing groups and, in turn, increase patient satisfaction | Qualitative, cross-sectional study | <p><b>Organisational climate:</b> Global Service Climate Scale; questionnaire measuring the effort exerted on specific tasks and effort intensity for contextual performance; Technical Care Scale; Job-Task Support Scale</p> <p><b>Patient outcome(s):</b> Questionnaire assessing patient satisfaction</p> | <p>156 nurses; 39 nurse unit managers (NUMs); 171 patients</p> <p>Data collected May 2007</p> | Two hospitals; Australia | <p>Patient satisfaction was positively associated with nurses' perception that there was a positive service climate</p> <p>Perceptions of service climate were associated with task and contextual effort, suggesting that a positive climate motivates nurses to provide quality patient care. Nurses felt that they exerted more effort towards providing technical care than towards performing extra-role tasks for patients</p> | High           |

| Study                  | Study objective(s)                                                                                                                                                                                                                                                                      | Study design                        | Measures                                                                                                                                                                                                                                                                                      | Participants; Duration                                                                         | Context; Setting                      | Key findings                                                                                                                                                                                                                                                                                              | Quality rating |
|------------------------|-----------------------------------------------------------------------------------------------------------------------------------------------------------------------------------------------------------------------------------------------------------------------------------------|-------------------------------------|-----------------------------------------------------------------------------------------------------------------------------------------------------------------------------------------------------------------------------------------------------------------------------------------------|------------------------------------------------------------------------------------------------|---------------------------------------|-----------------------------------------------------------------------------------------------------------------------------------------------------------------------------------------------------------------------------------------------------------------------------------------------------------|----------------|
| Hallowell et al., 2016 | Examine the association of the neonatal intensive care unit (NICU) work environment, staffing levels, level of nurse education, lactation consultant availability, and nurse-reported breastfeeding support with very low birth weight (VLBW) infant receipt of human milk at discharge | Quantitative, longitudinal study    | <p><b>Work environment:</b> Practice Environment Scale of the Nursing Work Index (PES-NWI); nursing metrics e.g., staffing, education, and experience</p> <p><b>Patient outcome(s):</b> Rate of very low birth weight infants discharged on “any human milk” from hospitalisation records</p> | <p>5,614 nurses; 6,997 patients (very low weight birth infants)</p> <p>Data collected 2008</p> | 97 neonatal intensive care units; USA | <p>Better nurse work environments and better educated nurses in US NICUs were associated with a higher provision of human milk for VLBW infants</p> <p>In NICUs where more infants receive breastfeeding support from nurses, more VLBW infants received human milk at the point of discharge to home</p> | High           |
| Hansen et al., 2011    | Define the relationship between hospital safety climate and readmission rates within 30                                                                                                                                                                                                 | Quantitative, cross-sectional study | <p><b>Organisational culture:</b> Patient Safety Climate in Healthcare Organizations (PSCHO)</p> <p><b>Patient outcome(s):</b> Risk-standardised hospital</p>                                                                                                                                 | 36,375 employees (frontline staff, nurses, physicians and senior managers)                     | 67 acute care hospitals; USA          | There was a significant positive association between lower safety climate and higher readmission rates for acute myocardial infarction (AMI) and                                                                                                                                                          | High           |

| Study              | Study objective(s)                                                                                                                                           | Study design                        | Measures                                                                                                                                                                                 | Participants; Duration                                                                                    | Context; Setting                    | Key findings                                                                                                                                                                                                                                                                                                    | Quality rating |
|--------------------|--------------------------------------------------------------------------------------------------------------------------------------------------------------|-------------------------------------|------------------------------------------------------------------------------------------------------------------------------------------------------------------------------------------|-----------------------------------------------------------------------------------------------------------|-------------------------------------|-----------------------------------------------------------------------------------------------------------------------------------------------------------------------------------------------------------------------------------------------------------------------------------------------------------------|----------------|
|                    | days following discharge                                                                                                                                     |                                     | readmission rates from Centers for Medicare and Medicaid Services (CMS)                                                                                                                  | Survey data collected July 2006-May 2007<br><br>Admission rate data collected 2008                        |                                     | heart failure (HF), but not pneumonia. Perceptions of frontline staff associated with readmission rates but not those of senior management<br><br>Physician and nurse perceptions of safety climate were associated with AMI and HF readmission rates, respectively, but senior management perceptions were not |                |
| Kelly et al., 2014 | Determine the extent to which variation in ICU nursing characteristics—staffing, work environment, education, and experience—is associated with mortality. A | Quantitative, cross-sectional study | <b>Organisational environment:</b> Two databases: University of Pennsylvania Multi-State Nursing Care and Patient Safety Study and the American Hospital Association (AHA) Annual Survey | 55,159 older adults on mechanical ventilation; 3,193 critical care nurses<br><br>Data collected 2006-2008 | 303 adult acute care hospitals; USA | Patients in critical care units with better nurse work environments experienced lower odds of 30-day mortality than those in worse nurse work environments                                                                                                                                                      | High           |

| Study                   | Study objective(s)                                                                                                                                                          | Study design                        | Measures                                                                                                                                                                                                                   | Participants; Duration                                 | Context; Setting              | Key findings                                                                                                                                                                                                                                                                                                | Quality rating |
|-------------------------|-----------------------------------------------------------------------------------------------------------------------------------------------------------------------------|-------------------------------------|----------------------------------------------------------------------------------------------------------------------------------------------------------------------------------------------------------------------------|--------------------------------------------------------|-------------------------------|-------------------------------------------------------------------------------------------------------------------------------------------------------------------------------------------------------------------------------------------------------------------------------------------------------------|----------------|
|                         | secondary result of this would be illuminating strategies to improve patient outcomes                                                                                       |                                     | Critical care nurses' reports; the Practice Environment Scale of the Nursing Work Index (PES-NWI)<br><br><b>Patient outcome(s):</b> The Medicare Provider Analysis and Review (MedPAR) database reporting 30-day mortality |                                                        |                               |                                                                                                                                                                                                                                                                                                             |                |
| Kutney-Lee et al., 2009 | Examine the contribution of nurses' work environments to patient satisfaction using national Hospital Consumer Assessment of Healthcare Providers and Systems (HCAHPS) data | Quantitative, cross-sectional study | <b>Work environment:</b> Practice Environment Scale of the Nursing Work Index (PES-NWI)<br><br><b>Patient outcome(s):</b> HCAHPS                                                                                           | 20,984 resident nurses<br><br>Data collected 2006-2009 | 430 acute care hospitals; USA | The nurse work environment was significantly related to all HCAHPS patient satisfaction measures<br><br>Patient-to-nurse workloads were significantly associated with patients' ratings and recommendation of the hospital to others, and with their satisfaction with the receipt of discharge information | Medium         |

| Study                   | Study objective(s)                                                                                                                                                                                                         | Study design                       | Measures                                                                                                                                                                                                                                                                                                                                                                                                                                                                                                                       | Participants; Duration                                                         | Context; Setting                                             | Key findings                                                                                                                                                                                                                                                                                                                                                                | Quality rating |
|-------------------------|----------------------------------------------------------------------------------------------------------------------------------------------------------------------------------------------------------------------------|------------------------------------|--------------------------------------------------------------------------------------------------------------------------------------------------------------------------------------------------------------------------------------------------------------------------------------------------------------------------------------------------------------------------------------------------------------------------------------------------------------------------------------------------------------------------------|--------------------------------------------------------------------------------|--------------------------------------------------------------|-----------------------------------------------------------------------------------------------------------------------------------------------------------------------------------------------------------------------------------------------------------------------------------------------------------------------------------------------------------------------------|----------------|
| Kutney-Lee et al., 2015 | Compare changes over time in surgical patient outcomes, nurse-reported quality, and nurse outcomes in a sample of hospitals that attained Magnet recognition between 1999 and 2007 with hospitals that remained non-Magnet | Quantitative, longitudinal study   | <p><b>Work environment:</b><br/>A binary variable measuring Magnetic status; Pennsylvania Registered Nurse Survey; Multi-State Nursing Care and Patient Safety Survey; The American Hospital Association (AHA) Annual Survey; Practice Environment Scale of the Nursing Work Index (PES-NWI)</p> <p><b>Patient outcome(s):</b><br/>Pennsylvania Health Care Cost Containment Council (PHC4) administrative discharge abstract files and death record files measuring 30-day surgical mortality and failure-to-rescue (FTR)</p> | 20,984 staff nurses; unspecified number of patients<br><br>Data collected 2007 | 136 hospitals (11 emerging Magnets and 125 non-Magnets); USA | <p>Emerging Magnet hospitals demonstrated markedly greater improvements over time on the PES-NWI overall score and all five subscales compared to hospitals that remained non-Magnet</p> <p>Emerging Magnet hospitals experienced significantly greater improvement 30-day surgical mortality and failure to rescue rates over time, compared to non-Magnetic hospitals</p> | Medium         |
| Larson et al., 2000     | Assess the impact of an intervention to change                                                                                                                                                                             | Quantitative, interventional study | <b>Organisational culture:</b><br>Handwashing frequency rates estimated from records of activation of                                                                                                                                                                                                                                                                                                                                                                                                                          | All staff in adult medical intensive care unit (MICU) and a neonatal           | Two hospitals (one intervention hospital, once               | Over a period of eight months, 860,567 soap dispensings were recorded, with                                                                                                                                                                                                                                                                                                 | High           |



| Study             | Study objective(s)                                                                                                                                                                                                                                                                                  | Study design         | Measures                                                                                                                                                                              | Participants; Duration                                          | Context; Setting          | Key findings                                                                                                                                                                                                                                                   | Quality rating |
|-------------------|-----------------------------------------------------------------------------------------------------------------------------------------------------------------------------------------------------------------------------------------------------------------------------------------------------|----------------------|---------------------------------------------------------------------------------------------------------------------------------------------------------------------------------------|-----------------------------------------------------------------|---------------------------|----------------------------------------------------------------------------------------------------------------------------------------------------------------------------------------------------------------------------------------------------------------|----------------|
|                   | organisational culture on frequency of staff handwashing (as measured by counting devices inserted into soap dispensers on four critical care units) and nosocomial infections associated with methicillin-resistant <i>Staphylococcus aureus</i> (MRSA) and vancomycin-resistant enterococci (VRE) |                      | <p>soap dispensers in study units</p> <p><b>Patient outcome(s):</b> Rates of nosocomial infections with MRSA and VRE. Data collected by infection control staff in each hospital.</p> | <p>intensive care unit (NICU)</p> <p>Duration not specified</p> | comparison hospital); USA | significant improvements in the study hospital after six months of follow-up. There were no significant differences in rates of MRSA between the two hospitals, but rates of VRE were significantly reduced in the intervention hospital during implementation |                |
| Ma and Park, 2015 | Examine the effects of work environment                                                                                                                                                                                                                                                             | Quantitative, cross- | <b>Work environment:</b><br>Practice Environment                                                                                                                                      | 33,845 registered nurses                                        | 373 hospitals; USA        | Units in Magnet hospitals had lower rates of pressure ulcers and                                                                                                                                                                                               | High           |

| Study           | Study objective(s)                                                                                                                                                                  | Study design                        | Measures                                                                                                                                                                                                                                                                                                | Participants; Duration                                                                      | Context; Setting   | Key findings                                                                                                                                                                                                                                                                                              | Quality rating |
|-----------------|-------------------------------------------------------------------------------------------------------------------------------------------------------------------------------------|-------------------------------------|---------------------------------------------------------------------------------------------------------------------------------------------------------------------------------------------------------------------------------------------------------------------------------------------------------|---------------------------------------------------------------------------------------------|--------------------|-----------------------------------------------------------------------------------------------------------------------------------------------------------------------------------------------------------------------------------------------------------------------------------------------------------|----------------|
|                 | on patient outcomes at the unit level while adjusting for the influence on hospital-level organisational factors such as Magnet status                                              | sectional study                     | Scale of the Nursing Work Index (PES-NWI)<br><br><b>Patient outcome(s):</b> Hospital-acquired pressure ulcer rates from the National Database of Nursing Quality Indicators (NDNQI)                                                                                                                     | Data collected 2013                                                                         |                    | better work environments<br><br>Hospital Magnet status and work environments were significantly associated with pressure ulcer rates after controlling for unit level covariates                                                                                                                          |                |
| Ma et al., 2015 | Determine the relationships between hospital nursing factors—nurse work environment, nurse staffing, and nurse education—and 30-day readmissions among Medicare patients undergoing | Quantitative, cross-sectional study | <b>Work environment:</b> Two databases: University of Pennsylvania Multi-State Nursing Care and Patient Safety Study and the American Hospital Association (AHA) Annual Survey<br><br><b>Patient outcome(s):</b> Medicare Provider and Analysis Review File (MedPAR) measuring 30-day readmission rates | 220,914 Medicare surgical patients; 25,082 nurses<br><br>Data collected July 2006-June 2007 | 258 hospitals; USA | Patients cared for in hospitals with better nurse work environments had lower odds of readmission, independent of nurse staffing levels. Administrative support to nursing practice and nurse-physician relations were two main attributes of the work environment that were associated with readmissions | High           |

| Study              | Study objective(s)                                                                                                                           | Study design                                                  | Measures                                                                                                                                                                                                                                                                                            | Participants; Duration                                                                                                                 | Context; Setting                                                                          | Key findings                                                                                                                                                                                                                                                                                     | Quality rating |
|--------------------|----------------------------------------------------------------------------------------------------------------------------------------------|---------------------------------------------------------------|-----------------------------------------------------------------------------------------------------------------------------------------------------------------------------------------------------------------------------------------------------------------------------------------------------|----------------------------------------------------------------------------------------------------------------------------------------|-------------------------------------------------------------------------------------------|--------------------------------------------------------------------------------------------------------------------------------------------------------------------------------------------------------------------------------------------------------------------------------------------------|----------------|
|                    | general, orthopaedic, and vascular surgery                                                                                                   |                                                               |                                                                                                                                                                                                                                                                                                     |                                                                                                                                        |                                                                                           |                                                                                                                                                                                                                                                                                                  |                |
| Maben et al., 2012 | Examine the links between staff experience of work and patient experience of care in a 'Medicine for Older People' (MfOP) service in England | Mixed-methods, cross-sectional study                          | <p><b>Organisational climate:</b> Questionnaire assessing organisational and local climate</p> <p><b>Patient outcome(s):</b> Patient Evaluation of Emotional Care During Hospitalisation (PEECH); short-form Picker Instrument; additional items from the longer UK NHS National Patient Survey</p> | <p>Survey: 66 staff; 26 patients</p> <p>Interview: 18 staff; 18 patients and carers</p> <p>Data collected January 2010-August 2010</p> | A dedicated service for older people situated in a large acute teaching hospital; England | <p>Patients experienced more varied and unpredictable nursing care on those wards with a poor local work climate for staff</p> <p>Emotional labour involved in being a patient was greater in poor care climates where the quality of care was unpredictable and patient experience variable</p> | Medium         |
| Mahl et al., 2015  | Evaluate the association of perceived organisational culture and quality improvement with the outcomes of                                    | Quantitative, combined cross-sectional and longitudinal study | <p><b>Organisational culture:</b> Quality Improvement Implementation Survey (QIIS)</p> <p><b>Patient outcome(s):</b> Survival without major morbidity from patient records</p>                                                                                                                      | <p>1,133 health care professional; 1,028 extremely pre-term infants</p> <p>Data collected April 2008-March 2009</p>                    | 18 neonatal ICUs; Canada                                                                  | <p>Higher group culture scores were associated with significantly lower rates of survival without major morbidity</p> <p>Higher hierarchical culture and higher quality improvement</p>                                                                                                          | High           |

| Study               | Study objective(s)                                                                                                                                                                                                                                 | Study design                        | Measures                                                                                                                                                                                                              | Participants; Duration                                    | Context; Setting   | Key findings                                                                                                                                                                                                                                                                                                                                                                                                                                                                 | Quality rating |
|---------------------|----------------------------------------------------------------------------------------------------------------------------------------------------------------------------------------------------------------------------------------------------|-------------------------------------|-----------------------------------------------------------------------------------------------------------------------------------------------------------------------------------------------------------------------|-----------------------------------------------------------|--------------------|------------------------------------------------------------------------------------------------------------------------------------------------------------------------------------------------------------------------------------------------------------------------------------------------------------------------------------------------------------------------------------------------------------------------------------------------------------------------------|----------------|
|                     | infants admitted to level III NICUs in Canada                                                                                                                                                                                                      |                                     |                                                                                                                                                                                                                       |                                                           |                    | scores were associated with higher rates of survival without major morbidity                                                                                                                                                                                                                                                                                                                                                                                                 |                |
| Mardon et al., 2010 | Examine relationships between the Agency for Healthcare Research and Quality's (AHRQ) Hospital Survey of Patient Safety Culture and rates of in-hospital complications and adverse events as measured by the AHRQ Patient Safety Indicators (PSIs) | Quantitative, cross-sectional study | <p><b>Safety culture:</b> The Agency for Healthcare Research and Quality (AHRQ) Hospital Survey on Patient Safety Culture (HSOPS)</p> <p><b>Patient outcome(s):</b> Selected AHRQ Patient Safety Indicators (PSI)</p> | 56,480 hospital employees<br><br>Data collected 2004-2006 | 179 hospitals; USA | Hospitals with higher patient safety culture scores tended to have lower rates of documented adverse events:<br>12/15 HSOPS variables were negatively correlated with PSIs. After controlling for hospital characteristics, seven HSOPS (frequency of events reported, handoffs and transitions, organisational learning—continuous improvement, staffing, teamwork across units, teamwork within units, HSOP composite average) remained statistically correlated with PSIs | High           |

| Study                   | Study objective(s)                                                | Study design                        | Measures                                                                                                                                                                                                                                                                         | Participants; Duration                                            | Context; Setting   | Key findings                                                                                                                                                                                                                                                                                                                                                                                                                                                          | Quality rating |
|-------------------------|-------------------------------------------------------------------|-------------------------------------|----------------------------------------------------------------------------------------------------------------------------------------------------------------------------------------------------------------------------------------------------------------------------------|-------------------------------------------------------------------|--------------------|-----------------------------------------------------------------------------------------------------------------------------------------------------------------------------------------------------------------------------------------------------------------------------------------------------------------------------------------------------------------------------------------------------------------------------------------------------------------------|----------------|
| McHugh and Ma, 2013     | Understand how the nursing care environment affects readmissions  | Quantitative, cross-sectional study | <p><b>Work environment:</b> Practice Environment Scale of the Nursing Work Index (PES-NWI); nurse staffing levels; nurse educational attainment</p> <p><b>Patient outcome(s):</b> Data on index admissions and readmissions obtained from state discharge abstract databases</p> | <p>375,681 patients; 20,585 nurses</p> <p>Data collected 2006</p> | 412 hospitals; USA | <p>Care in a hospital with a good versus poor work environment was associated with 7% lower odds of 30-day readmission for heart failure patients, 6% lower odds for acute myocardial infarction patients and 10% lower odds for pneumonia patients</p> <p>The odds of readmission was 4% lower for heart failure, 3% lower for acute myocardial infarction and 6% lower for pneumonia patients cared for in a hospital with a mixed versus poor work environment</p> | High           |
| Meraviglia et al., 2008 | Assist rural or small hospitals (average daily census < 100) with | Quantitative, interventional study  | <b>Work environment:</b> Nursing Work Index-Revised (NWI-R)                                                                                                                                                                                                                      | <p>1,150 nurses</p> <p>Duration not specified</p>                 | 30 hospitals; USA  | There were positive changes in the nurses' perception of their work environment (indicating that that the                                                                                                                                                                                                                                                                                                                                                             | Medium         |

| Study                  | Study objective(s)                                                                                                                                          | Study design                        | Measures                                                                                                                                                                                                                                     | Participants; Duration                                                                                                                                 | Context; Setting                                      | Key findings                                                                                                                                                                      | Quality rating |
|------------------------|-------------------------------------------------------------------------------------------------------------------------------------------------------------|-------------------------------------|----------------------------------------------------------------------------------------------------------------------------------------------------------------------------------------------------------------------------------------------|--------------------------------------------------------------------------------------------------------------------------------------------------------|-------------------------------------------------------|-----------------------------------------------------------------------------------------------------------------------------------------------------------------------------------|----------------|
|                        | implementing 12 nurse friendly criteria into the policies and practices of the hospital to create a positive work environment                               |                                     | <b>Patient outcome(s):</b><br>Hospital reported prevalence of pressure ulcers, patient falls, and hospital-acquired pneumonia and urinary tract infections                                                                                   |                                                                                                                                                        |                                                       | intervention successfully improved organisational culture)<br><br>Quality of care improved at participating hospitals, as measured by the nurse-sensitive quality indicators (QI) |                |
| Morris A et al., 2007  | Examine the effects of organisational culture and climate, as well as individual characteristics, on outcomes of care for adults with severe mental illness | Quantitative, longitudinal study    | <b>Organisational culture and climate:</b><br>Questionnaire assessing organisational culture and climate<br><br><b>Patient outcome(s):</b><br>Quality of Life (QOL) index; SF-36; Medicaid claims data; Clinician diagnoses using the DSM IV | 424 Patients with chronic mental illness; 274 administrators and health workers<br><br>Data collected over three years; collection dates not specified | 14 Community Mental Health Organizations (CMHOs); USA | Organisational culture and climate were strong predictors of perceived improvements in physical and mental health status over time, but were not associated with changes in QOL   | High           |
| Nasirpour et al., 2010 | Determine the relationship of Centralisation and organisational culture and                                                                                 | Quantitative, cross-sectional study | <b>Organisational culture:</b><br>Robbin's organizational culture questionnaire                                                                                                                                                              | 441 personnel<br><br>Data collected 2007                                                                                                               | 13 hospitals; Iran                                    | No significant correlation was observed between organisational culture and hospital performance indexes                                                                           | Low            |

| Study                 | Study objective(s)                                                                                                  | Study design                     | Measures                                                                                                                                                                                                    | Participants; Duration                                                                             | Context; Setting     | Key findings                                                                                                                                                                                                                                                                                                                                                                                                    | Quality rating |
|-----------------------|---------------------------------------------------------------------------------------------------------------------|----------------------------------|-------------------------------------------------------------------------------------------------------------------------------------------------------------------------------------------------------------|----------------------------------------------------------------------------------------------------|----------------------|-----------------------------------------------------------------------------------------------------------------------------------------------------------------------------------------------------------------------------------------------------------------------------------------------------------------------------------------------------------------------------------------------------------------|----------------|
|                       | performance indexes in Teaching Hospitals affiliated to Tehran University of Medical Sciences                       |                                  | <b>Patient outcome(s):</b><br>Performance indexes (average length of stay, inpatient bed occupancy ratio, rate of admissions per active bed, net death rate and ratio of surgical operations to inpatients) |                                                                                                    |                      |                                                                                                                                                                                                                                                                                                                                                                                                                 |                |
| Nowinski et al., 2007 | Monitor changes in organisational culture, continuous quality improvement (QI), maturity and QI indicators overtime | Quantitative, longitudinal study | <b>Organisational culture:</b><br>Culture and Quality Questionnaire (CQQ)<br><br><b>Patient outcome(s):</b> Press Ganey patient satisfaction survey; multiple standard quality indicators                   | 621 employees at Baseline and 471 employees at Time 2<br><br>Data collected March 2003- March 2006 | Three hospitals; USA | Several strong correlations were found between changes in culture score and changes in quality indicators at the three facilities. Appropriate discharge of patients with chest pain was negatively correlated with developmental culture; use of antibiotics within four hours of admission was positively associated with rational culture and quality management and negatively related to group culture and | Medium         |

| Study                   | Study objective(s)                                                                        | Study design                        | Measures                                                                                                                                                                                                                                                                    | Participants; Duration                               | Context; Setting                                          | Key findings                                                                                                                                                                                                                               | Quality rating |
|-------------------------|-------------------------------------------------------------------------------------------|-------------------------------------|-----------------------------------------------------------------------------------------------------------------------------------------------------------------------------------------------------------------------------------------------------------------------------|------------------------------------------------------|-----------------------------------------------------------|--------------------------------------------------------------------------------------------------------------------------------------------------------------------------------------------------------------------------------------------|----------------|
|                         |                                                                                           |                                     |                                                                                                                                                                                                                                                                             |                                                      |                                                           | human resource utilisation; and patient satisfaction was positively correlated with group culture and negatively correlated with rational culture                                                                                          |                |
| Prezerakos et al., 2015 | Investigate the correlation between haemodialysis work environment and patients' outcomes | Quantitative, cross-sectional study | <p><b>Work environment:</b> Practice Environment Scale of the Nursing Work Index (PES-NWI)</p> <p><b>Patient outcome(s):</b> Questionnaire assessing how often selected errors and adverse events have occurred under the nursing care during the previous three months</p> | 133 nurses<br>Data collected June-July 2012          | 11 hospital-based dialysis units; Greece                  | <p>Hypotension, venous needle disconnection and patient falls were associated with non-favourable work environment</p> <p>Hypoglycaemia, medication error and catheter-associated infections were not associated with work environment</p> | High           |
| Purdy et al., 2010      | Determine impact of the work environment on patient care                                  | Quantitative, cross-sectional study | <p><b>Work environment:</b> Work Effectiveness Questionnaire (CWEQ-II); Work Group Characteristics Measure; Psychological</p>                                                                                                                                               | 679 nurses; 1,005 patients<br>Duration not specified | 61 medical and surgical units across 21 hospitals; Canada | Structural empowerment, mediated through group processes, significantly impacted a variety of patient outcomes including nurse-assessed                                                                                                    | High           |



| Study              | Study objective(s)                                                                | Study design                        | Measures                                                                                                                                                                                                                                                                             | Participants;<br>Duration                                                                         | Context; Setting                                                                               | Key findings                                                                                                                                                                                                                                                                                   | Quality rating |
|--------------------|-----------------------------------------------------------------------------------|-------------------------------------|--------------------------------------------------------------------------------------------------------------------------------------------------------------------------------------------------------------------------------------------------------------------------------------|---------------------------------------------------------------------------------------------------|------------------------------------------------------------------------------------------------|------------------------------------------------------------------------------------------------------------------------------------------------------------------------------------------------------------------------------------------------------------------------------------------------|----------------|
|                    |                                                                                   |                                     | <p>Empowerment Questionnaire (PEQ)</p> <p><b>Patient outcome(s):</b><br/>Patient falls and nurse assessed risks, measured using an instrument developed by Sochalski (2001); Nursing Care Quality Questionnaire (PSNCQQ); Therapeutic Self-care Questionnaire-Acute Care Version</p> |                                                                                                   |                                                                                                | <p>quality and risk as well as an objective measure of patient falls although no significant effect was found for variables assessed using the patient's perspective</p>                                                                                                                       |                |
| Saame et al., 2011 | Outline the relationships between organisational culture and patient satisfaction | Quantitative, cross-sectional study | <p><b>Organisational culture:</b><br/>Organisational Values Questionnaire (OVQ)</p> <p><b>Patient outcome(s):</b><br/>Patient satisfaction ratings</p>                                                                                                                               | <p>456 medical and non-medical professionals</p> <p>Data collected October 2005-February 2006</p> | One hospital (including two clinics with high patient satisfaction and four with low); Estonia | <p>Clinics with high patient satisfaction did not score more than clinics with low patient satisfaction in terms of the Human Relations type</p> <p>Clinics with high patient satisfaction were less oriented towards Rational Goal type values than clinics with low patient satisfaction</p> | Medium         |

| Study                 | Study objective(s)                                                                                                                                                                     | Study design                        | Measures                                                                                                                                                                                                                                                                                                                                                                                  | Participants; Duration                                                                                   | Context; Setting                                                | Key findings                                                                                                                                                                                                                                                                                                                                                                            | Quality rating |
|-----------------------|----------------------------------------------------------------------------------------------------------------------------------------------------------------------------------------|-------------------------------------|-------------------------------------------------------------------------------------------------------------------------------------------------------------------------------------------------------------------------------------------------------------------------------------------------------------------------------------------------------------------------------------------|----------------------------------------------------------------------------------------------------------|-----------------------------------------------------------------|-----------------------------------------------------------------------------------------------------------------------------------------------------------------------------------------------------------------------------------------------------------------------------------------------------------------------------------------------------------------------------------------|----------------|
| Scotti et al., 2007   | Examine how a high-involvement approach to the work environment of healthcare employees may lead to exceptional service quality, satisfied patients, and ultimately to loyal customers | Mixed-methods cross-sectional study | <p><b>Work climate:</b><br/>Questionnaire assessing human resource practices, customer orientation and employee-perceived service quality based on pre-existing Veterans' Affairs Questionnaire</p> <p><b>Patient outcome(s):</b><br/>Questionnaire assessing customer perceived quality and customer satisfaction based on pre-existing Veterans Health Administration Questionnaire</p> | 59,464 employees; 212,874 respondents<br><br>Data collected 2001                                         | 113 Veterans Health Administration ambulatory care centres; USA | <p>High-performance work systems are linked to employee perceptions of their ability to deliver high-quality customer service, both directly and through their perceptions of customer orientation</p> <p>Employee perceptions of customer service are linked to customer perceptions of high-quality service</p> <p>Perceived service quality is linked with customer satisfaction</p> | High           |
| Shortell et al., 1995 | Examine the relationships between organisational culture, quality improvement processes and selected                                                                                   | Quantitative, cross-sectional study | <b>Organisational culture:</b><br>20-item questionnaire developed by Zammuto and Krakower (1991) assessing group culture, developmental culture, hierarchical culture, and rational culture scales                                                                                                                                                                                        | Continuous quality improvement and total quality management: an unspecified number of CEOs and person in | 61 hospitals; USA                                               | A participative, flexible, risk-taking organisational culture was significantly related to quality improvement implementation                                                                                                                                                                                                                                                           | Medium         |

| Study                 | Study objective(s)                                                                                                                                                   | Study design                     | Measures                                                                                                                                                                                                                                                                                                                                    | Participants; Duration                                                                                                                                                                      | Context; Setting                                                                                                       | Key findings                                                                                                                                                                                                                                                                                                    | Quality rating |
|-----------------------|----------------------------------------------------------------------------------------------------------------------------------------------------------------------|----------------------------------|---------------------------------------------------------------------------------------------------------------------------------------------------------------------------------------------------------------------------------------------------------------------------------------------------------------------------------------------|---------------------------------------------------------------------------------------------------------------------------------------------------------------------------------------------|------------------------------------------------------------------------------------------------------------------------|-----------------------------------------------------------------------------------------------------------------------------------------------------------------------------------------------------------------------------------------------------------------------------------------------------------------|----------------|
|                       | patient outcomes                                                                                                                                                     |                                  | <p><b>Patient outcome(s):</b> A patient outcome impact scale assessing improved patient outcomes, reduced errors and inappropriate treatment, increased patient satisfaction, and improved continuity of patient care</p>                                                                                                                   | <p>charge of quality assessment</p> <p>Organisational culture: 7,337 hospital staff</p> <p>Implementation: Approximately 50 respondents from per hospital</p> <p>Duration not specified</p> |                                                                                                                        | <p>Quality improvement implementation was significantly associated with greater perceived patient outcomes and human resource development, but not financial outcomes</p>                                                                                                                                       |                |
| Shortell et al., 2000 | Test impact of total quality management (TQM) and organisational culture on a comprehensive set of endpoints of care for coronary artery bypass graft surgery (CABG) | Quantitative, longitudinal study | <p><b>Organisational culture:</b> Previously validated 20-item questionnaire developed by Zammuto and Krakower (1991)</p> <p><b>Patient outcome(s):</b> CABG care endpoints (mortality, adverse outcome, clinical efficiency); Patient satisfaction questionnaire consisting of Patient Judgment System 24-item (PJS-24) questionnaire,</p> | <p>3,045 patients; an average of 54 staff per hospital</p> <p>Data collected 1995-1996</p>                                                                                                  | <p>16 nongovernmental, not-for-profit, short-term-care general service hospitals engaged in TQM interventions; USA</p> | <p>A supportive group culture was significantly associated with shorter postoperative intubation times, and higher patient physical and mental functional health status scores six months after CABG, but also with longer operating room times</p> <p>There was little effect of organisational culture on</p> | High           |

| Study               | Study objective(s)                                                                                          | Study design                        | Measures                                                                                                                                                                                          | Participants; Duration                                       | Context; Setting  | Key findings                                                                                                                                                                                                                                                                                                                                                                                                                                                     | Quality rating |
|---------------------|-------------------------------------------------------------------------------------------------------------|-------------------------------------|---------------------------------------------------------------------------------------------------------------------------------------------------------------------------------------------------|--------------------------------------------------------------|-------------------|------------------------------------------------------------------------------------------------------------------------------------------------------------------------------------------------------------------------------------------------------------------------------------------------------------------------------------------------------------------------------------------------------------------------------------------------------------------|----------------|
|                     |                                                                                                             |                                     | 'returning to home issues' items, and 'the needs of heart patients' items                                                                                                                         |                                                              |                   | multiple end-points of care for CABG patients                                                                                                                                                                                                                                                                                                                                                                                                                    |                |
| Singer et al., 2009 | Study the relationship between safety climate and safety performance using Patient Safety Indicators (PSIs) | Quantitative, cross-sectional study | <p><b>Safety climate:</b> Patient Safety Climate in Healthcare Organizations (PSCHO) 2004</p> <p><b>Patient outcome(s):</b> The Medicare Provider Analysis and Review (MEDPAR) File from 2005</p> | <p>18,223 hospital staff</p> <p>Data collected 2004-2005</p> | 91 hospitals; USA | <p>Higher levels of safety climate were associated with higher safety performance</p> <p>Hospitals in which personnel reported more problems with fear of shame and blame had significantly greater risk of experiencing PSIs</p> <p>Perceptions of higher safety climate overall among frontline personnel were associated with a relative increase in the risk of experiencing PSIs, but safety climate perceptions overall among senior managers were not</p> | High           |

| Study              | Study objective(s)                                                                                                      | Study design                        | Measures                                                                                                                                                                                                                                                                                                                                                                                                                                                                                                                                                                                                       | Participants;<br>Duration                                | Context; Setting                                       | Key findings                                                                                                                                                                                                                                                                                                                                                                                                                                                                                                   | Quality rating |
|--------------------|-------------------------------------------------------------------------------------------------------------------------|-------------------------------------|----------------------------------------------------------------------------------------------------------------------------------------------------------------------------------------------------------------------------------------------------------------------------------------------------------------------------------------------------------------------------------------------------------------------------------------------------------------------------------------------------------------------------------------------------------------------------------------------------------------|----------------------------------------------------------|--------------------------------------------------------|----------------------------------------------------------------------------------------------------------------------------------------------------------------------------------------------------------------------------------------------------------------------------------------------------------------------------------------------------------------------------------------------------------------------------------------------------------------------------------------------------------------|----------------|
| Stone et al., 2007 | Examine effects of a comprehensive set of working conditions on elderly patient safety outcomes in intensive care units | Quantitative, cross-sectional study | <p><b>Organisational climate:</b><br/>Perceptions of Nurse Work Environment Scale; administrative processes derived from monthly payroll data; monthly total ICU patient census data; Bureau of Labor Statistics regional estimates of RN salary</p> <p><b>Patient outcome(s):</b><br/>Central line associated bloodstream infection (CLBSI), ventilator associated pneumonia (VAP), and catheter-associated urinary tract infection (CAUTI) derived from Nosocomial Infections Surveillance's (NNIS) system of infection surveillance; 30-day mortality and decubiti were determined using Medicare files</p> | 15,846 patients; 1,095 nurses<br><br>Data collected 2002 | 51 adult intensive care units across 31 hospitals; USA | <p>Units with higher staffing had lower incidence of CLBSI, VAP, 30-day mortality, and decubiti</p> <p>Increased overtime was associated with higher rates of CAUTI and decubiti, but slightly lower rates of CLBSI</p> <p>The effects of organisational climate on patient safety outcomes were inconsistent. Patients admitted to ICUs in which the nurses' perceived a more positive organisational climate had slightly higher odds of developing a CLBSI, but were 39% less likely to develop a CAUTI</p> | High           |

| Study                       | Study objective(s)                                                                                                                              | Study design                        | Measures                                                                                                                                                                                                                                                                                                                                                 | Participants; Duration                                                                                             | Context; Setting                                | Key findings                                                                                                                                                                                                                                                | Quality rating |
|-----------------------------|-------------------------------------------------------------------------------------------------------------------------------------------------|-------------------------------------|----------------------------------------------------------------------------------------------------------------------------------------------------------------------------------------------------------------------------------------------------------------------------------------------------------------------------------------------------------|--------------------------------------------------------------------------------------------------------------------|-------------------------------------------------|-------------------------------------------------------------------------------------------------------------------------------------------------------------------------------------------------------------------------------------------------------------|----------------|
| Taylor et al., 2012         | Investigate the extent to which organisational characteristics (working conditions and safety climate) predict injuries for patients and nurses | Quantitative, cross-sectional study | <p><b>Safety climate:</b> Safety Attitudes Questionnaire (SAQ); unit turnover rates; registered nursing hours per day data obtained from Human Resources</p> <p><b>Patient outcome(s):</b> Patient injuries (falls, pressure ulcers, and pulmonary embolism/deep vein thrombosis) from administrative discharge data and Patient Safety Net software</p> | <p>723 nurses; 28,876 patient discharges</p> <p>Data collected: Safety climate: 2004<br/>Injury outcomes: 2005</p> | A trauma centre with Magnet nursing status; USA | <p>Safety culture was significantly associated with patient outcomes e.g., falls, decubitus ulcers and PE/DVT</p> <p>Working conditions were significantly associated with patient and nurse injury</p>                                                     | High           |
| Tei-Tominaga and Sato, 2016 | Examine the effect of nurses' work environment with characteristics that are similar to those of Magnet hospitals on patient                    | Quantitative, cross-sectional study | <p><b>Work environment:</b> Japanese version of the Practice Environment Scale of the Nursing Work Index (PES-NWI)</p> <p><b>Patient outcome(s):</b> Questionnaire assessing information about hospitalisation (number of hospitalisations, duration of hospitalisation, having</p>                                                                      | <p>425 nurses; 379 inpatients</p> <p>Data collected August 2011</p>                                                | Four hospitals; Japan                           | <p>Hospitals in Japan with a work environment that nurses perceive to be similar to the work environment in Magnet hospitals were associated with patient satisfaction</p> <p>Specifically, collegial nurse-physician relations was associated with low</p> | High           |

| Study                       | Study objective(s)                                                                                                                                                                      | Study design                        | Measures                                                                                                                                                                                                                                               | Participants; Duration                                                           | Context; Setting                      | Key findings                                                                                                                                                                                                                                                                                                                                                                                                        | Quality rating |
|-----------------------------|-----------------------------------------------------------------------------------------------------------------------------------------------------------------------------------------|-------------------------------------|--------------------------------------------------------------------------------------------------------------------------------------------------------------------------------------------------------------------------------------------------------|----------------------------------------------------------------------------------|---------------------------------------|---------------------------------------------------------------------------------------------------------------------------------------------------------------------------------------------------------------------------------------------------------------------------------------------------------------------------------------------------------------------------------------------------------------------|----------------|
|                             | satisfaction in Japan                                                                                                                                                                   |                                     | operative treatment), and patient satisfaction                                                                                                                                                                                                         |                                                                                  |                                       | patient satisfaction, however this association was weak, and diminished when hospital characteristics were considered in the analysis                                                                                                                                                                                                                                                                               |                |
| Temkin-Greener et al., 2010 | Examine the association between nursing home (NH) work environment attributes such as teams, consistent assignment and staff cohesion, and the risk of pressure ulcers and incontinence | Quantitative, cross-sectional study | <p><b>Work environment:</b><br/>Questionnaire purpose designed for the study assessing staff cohesion, presence of teams and consistent assignment</p> <p><b>Patient outcome(s):</b><br/>Pressure ulcer and incontinence from the Minimum Data Set</p> | <p>46,044 residents; 7,418 workers</p> <p>Data collected June 2006-July 2007</p> | 162 long-term care nursing homes; USA | <p>Residents in facilities with worse staff cohesion had significantly greater odds of pressure ulcers and incontinence, compared with residents in facilities with better cohesion scores</p> <p>Residents in facilities with greater penetration of self-managed teams had lower risk of pressure ulcers, but not of incontinence</p> <p>Prevalence of consistent assignment was not significantly associated</p> | High           |

| Study                        | Study objective(s)                                                                                                                         | Study design                        | Measures                                                                                                                                                                                                                                                     | Participants; Duration                                                       | Context; Setting                                                                                   | Key findings                                                                                                                                          | Quality rating |
|------------------------------|--------------------------------------------------------------------------------------------------------------------------------------------|-------------------------------------|--------------------------------------------------------------------------------------------------------------------------------------------------------------------------------------------------------------------------------------------------------------|------------------------------------------------------------------------------|----------------------------------------------------------------------------------------------------|-------------------------------------------------------------------------------------------------------------------------------------------------------|----------------|
|                              |                                                                                                                                            |                                     |                                                                                                                                                                                                                                                              |                                                                              |                                                                                                    | with pressure ulcers or incontinence                                                                                                                  |                |
| Tervo-Heikkinen et al., 2008 | Assess the interrelationships between nurses' work environment and nursing outcomes                                                        | Quantitative, cross-sectional study | <p><b>Work environment:</b> Registered Nurse Working Conditions Barometry Index-revised (RN-WCBI-R); items from the Nurse Work Index-revised (NWI-R)</p> <p><b>Patient outcome(s):</b> Total satisfaction indicator from the Humane Caring Scale-revised</p> | 664 registered nurses (RN); 1,730 patients<br><br>Data collected during 2005 | 34 acute care inpatient hospital wards across four hospitals; Finland                              | Professional nursing standards staffing adequacy, and nursing respect and relationships were found to be important predictors of patient satisfaction | High           |
| Tzeng et al., 2002           | Investigate the relationship among staff nurses' assessment of organisational culture and general inpatient satisfaction with nursing care | Quantitative, cross-sectional study | <p><b>Organisational culture:</b> Nurse Assessment Survey (NAS)</p> <p><b>Patient outcome(s):</b> Nursing Services Inpatient Satisfaction Survey (NSISS)</p>                                                                                                 | 520 registered nurses; 345 patients<br><br>Duration not specified            | 13 medical/surgical adult units; two adult psychiatric units; two gynaecology/obstetric units; USA | Strength of culture had indirect positive effects (through nurse satisfaction) on patient satisfaction                                                | Medium         |
| Virtanen et al., 2009        | Examine the association                                                                                                                    | Quantitative, cross-                | <b>Organisational climate:</b> Questionnaire measuring                                                                                                                                                                                                       | 1,092 patients; 1,159 staff                                                  | Six hospitals; Finland                                                                             | Long working hours among staff, high work                                                                                                             | High           |



| Study               | Study objective(s)                                                                                                                        | Study design                        | Measures                                                                                                                                                                                                                                                                                                                                                                               | Participants; Duration                                        | Context; Setting        | Key findings                                                                                                                                                                                                                                                                                                                            | Quality rating |
|---------------------|-------------------------------------------------------------------------------------------------------------------------------------------|-------------------------------------|----------------------------------------------------------------------------------------------------------------------------------------------------------------------------------------------------------------------------------------------------------------------------------------------------------------------------------------------------------------------------------------|---------------------------------------------------------------|-------------------------|-----------------------------------------------------------------------------------------------------------------------------------------------------------------------------------------------------------------------------------------------------------------------------------------------------------------------------------------|----------------|
|                     | between work hours, work stress, and collaboration among the ward personnel, and the risk of hospital-associated infection among patients | sectional study                     | <p>mean working hours, work stress (job strain and effort-reward imbalance), and collaboration (communication, justice in the distribution of work, support from supervisor, and quality of the collaboration between supervisors in the ward)</p> <p><b>Patient outcome(s):</b><br/>Hospital-associated infection derived from medical records and infection surveillance records</p> | Data collected March 2004-June 2004                           |                         | <p>stress, and problems in collaboration between personnel were related to infection among patients</p> <p>High effort-reward imbalance, low trust between ward members, injustice in the distribution of work, and poor collaboration between supervisors were all related to approximately a 2-fold infection risk among patients</p> |                |
| Warren et al., 2007 | Explore the association between health care employees' perceptions of their organisations and objective measures of                       | Quantitative, cross-sectional study | <p><b>Organisational climate:</b><br/>All Employee Survey (AES) comprising questions from the National Institute for Occupational Safety and Health (NIOSH) Instrument and the Organizational Assessment Survey (OAS); Bureau of Labor Statistics Survey of Employment;</p>                                                                                                            | <p>74,662 employees of the VHA</p> <p>Data collected 2001</p> | 141 VHA facilities; USA | <p>There was a relationship between some patient outcomes and organisational culture</p> <p>Patient satisfaction demonstrated the strongest connection with organisational climate. Inpatient and outpatient satisfaction</p>                                                                                                           | High           |

| Study                 | Study objective(s)                                                                                        | Study design                        | Measures                                                                                                                                                                                                                                                                                                                             | Participants; Duration                                                                             | Context; Setting                                             | Key findings                                                                                                                                                                      | Quality rating |
|-----------------------|-----------------------------------------------------------------------------------------------------------|-------------------------------------|--------------------------------------------------------------------------------------------------------------------------------------------------------------------------------------------------------------------------------------------------------------------------------------------------------------------------------------|----------------------------------------------------------------------------------------------------|--------------------------------------------------------------|-----------------------------------------------------------------------------------------------------------------------------------------------------------------------------------|----------------|
|                       | system performance (including employee and patient outcomes).                                             |                                     | Federal Aviation Administration Instrument<br><br><b>Patient outcome(s):</b> AES measuring attitudinal outcomes, and health and safety outcomes; Administrative Veterans Health Administration (VHA) Data Sets                                                                                                                       |                                                                                                    |                                                              | was strongly related to increased levels of support, and increased inpatient satisfaction is also associated with higher levels of Professional Demands                           |                |
| Weinberg et al., 2013 | Examine the benefits of a high-performance work environment (HPWE) for employees, patients, and hospitals | Quantitative, cross-sectional study | <b>Work environment:</b> Questionnaire based on Revised Nursing Work Index, Picker Hospital Employee Survey; variety of tools from other workplace settings, with particular focus on research on high-performance work systems and teams<br><br><b>Patient outcome(s):</b> Hospital Consumer Assessment of Healthcare Providers and | 16,459 discharge records; 2,920 patient surveys; 1,527 staff surveys<br><br>Duration not specified | 45 units across nine hospitals and seven health systems; USA | HPWE was significantly associated with patients' experience and safety. HPWE was related to lower odds that a patient will experience an adverse outcome during the hospital stay | High           |

| Study            | Study objective(s)                                                                                       | Study design                        | Measures                                                                                                                                                                                                                                                                          | Participants; Duration                                                                  | Context; Setting     | Key findings                                                                                                                                                                                                                                                                                                                                                         | Quality rating |
|------------------|----------------------------------------------------------------------------------------------------------|-------------------------------------|-----------------------------------------------------------------------------------------------------------------------------------------------------------------------------------------------------------------------------------------------------------------------------------|-----------------------------------------------------------------------------------------|----------------------|----------------------------------------------------------------------------------------------------------------------------------------------------------------------------------------------------------------------------------------------------------------------------------------------------------------------------------------------------------------------|----------------|
|                  |                                                                                                          |                                     | Systems (HCAHPS); discharge data                                                                                                                                                                                                                                                  |                                                                                         |                      |                                                                                                                                                                                                                                                                                                                                                                      |                |
| You et al., 2013 | Evaluate the link between nurse resources and nurse and patient outcomes                                 | Quantitative, cross-sectional study | <p><b>Work environment:</b><br/>Four of the five subscales of the Practice Environment Scale of the Nursing Work Index (PES-NWI)</p> <p><b>Patient outcome(s):</b><br/>Adapted version of the Consumer Assessment of Healthcare Providers and Systems (CAHPS) Hospital Survey</p> | <p>9,688 staff (nurses in particular); 5,786 patients</p> <p>Duration not specified</p> | 181 hospitals; China | <p>Patients in hospitals with better work environments were more likely to rate their hospital highly, to be satisfied with nursing communications, and to recommend their hospitals</p> <p>Higher patient-to-nurse ratios were unrelated to patient outcomes</p> <p>Higher percentages of baccalaureate nurses were strongly related to better patient outcomes</p> | High           |
| Zhou P, 2011     | Determine whether perceptions of organisational culture among employees of public hospitals in China are | Quantitative, cross-sectional study | <p><b>Organisational culture:</b><br/>Employee questionnaire measuring organisational culture</p> <p><b>Patient outcome(s):</b><br/>Hospital questionnaire assessing performance</p>                                                                                              | <p>3,437 staff; 8,276 patients</p> <p>Data collected June-October 2009</p>              | 87 hospitals; China  | <p>Culture emphasising social responsibility was negatively associated with length of stay</p> <p>Hospitals with culture emphasising cost control had higher rates of</p>                                                                                                                                                                                            | High           |

| Study | Study objective(s)                   | Study design | Measures                                                                                                                                           | Participants; Duration | Context; Setting | Key findings                                                                                                                                                                                                                 | Quality rating |
|-------|--------------------------------------|--------------|----------------------------------------------------------------------------------------------------------------------------------------------------|------------------------|------------------|------------------------------------------------------------------------------------------------------------------------------------------------------------------------------------------------------------------------------|----------------|
|       | associated with hospital performance |              | outcomes such as LOS, outpatient visits per year, bed days per year, patient satisfaction; patient survey measuring satisfaction with medical care |                        |                  | <p>outpatient visits and BDPPPD, as well as lower levels of patient satisfaction</p> <p>Hospitals in which employees perceived the culture as customer-focused had longer length of stays but lower patient satisfaction</p> |                |
